# Supplementary material for: Cobalt nanoparticle-catalysed N-alkylation of amides with alcohols
Source: Royal Society of Chemistry journal article supplement (doi:10.1039/d3gc03286h), 2023-12-08
Supplement: d3gc03286h1.pdf [file d3gc03286h1.pdf]

## **Supporting Information**

### **Cobalt-nanoparticles catalysed *N*-alkylation of amides with alcohols**

Rui Ma,<sup>a</sup> Jie Gao,<sup>a</sup> Lan Zhang,<sup>b</sup> Ning Wang,<sup>b</sup> Yue Hu,<sup>a</sup> Stephan Bartling,<sup>a</sup> Henrik Lund,<sup>a</sup> Sebastian Wohlrab,<sup>\*a</sup> Rajenahally V. Jagadeesh,<sup>\*a,c</sup> and Matthias Beller<sup>\*a</sup>

<sup>a</sup>Leibniz-Institut für Katalyse e.V., Albert-Einstein-Str. 29a, 18059 Rostock, Germany.

<sup>b</sup>Faculty of Environment and Life, Beijing University of Technology, 100124 Beijing, China.

<sup>c</sup> Nanotechnology Centre, Centre for Energy and Environmental Technologies, VŠB-Technical University of Ostrava, Ostrava-Poruba, Czech Republic.

#### **Table of Contents**

1. Materials and methods
2. Preparation of catalysts
3. Screening of bases
4. Procedure for catalytic reactions
5. Characterization of Co-materials
6. NMR data
7. NMR spectra
8. References

## 1. Materials and methods

All the alcohols and amides were purchased from various chemical companies. Cobalt(II) nitrate hexahydrate (cat no.139267-100G) was provided by Sigma-Aldrich. Toluene solvent (analytic reagent grade) was obtained from Fischer scientific chemicals. Carbon powder, VULCAN® XC72R with Code XVC72R and CAS No. 1333-86-4 was obtained from Cabot Corporation Prod.

XRD powder pattern were recorded on a Panalytical X'Pert  $\theta/2\theta$  -diffractometer equipped with Xcelerator detector using automatic divergence slits and Cu  $k\alpha_1/\alpha_2$  radiation (40 kV, 40 mA;  $\lambda = 0.15406$  nm,  $0.154443$  nm). Cu beta-radiation was excluded using a nickel filter foil. Measurements were performed with  $0.005^\circ\text{s}^{-1}$ . Finely crushed samples were mounted on silicon zero background holders. After data collection obtained intensities were converted from automatic to fixed divergence slits ( $0.25^\circ$ ) for further analysis. Peak positions and profile were fitted with Pseudo-Voigt function using the HighScore Plus software package (Panalytical). Phase identification was done by using the PDF-2 database of the International Center of Diffraction Data (ICDD).

XPS (X-ray Photoelectron Spectroscopy) measurements were performed on an ESCALAB 220iXL (Thermo Fisher Scientific) with monochromated Al  $K\alpha$  radiation ( $E = 1486.6$  eV). Samples are prepared on a stainless-steel holder with conductive double-sided adhesive carbon tape. The electron binding energies were obtained with charge compensation using a flood electron source and referenced to the C 1s core level of adventitious carbon at 284.8 eV (C-C and C-H bonds). For quantitative analysis the peaks were deconvoluted with Gaussian-Lorentzian curves using the software Unifit 2021. The peak areas were normalized by the transmission function of the spectrometer and the element specific sensitivity factor of Scofield.

The surface area and porosity were carried out by the  $N_2$  adsorption isotherm using the Brunauer-Emmett-Teller (BET) method on an ASAP 2020 Micromeritics instrument. Before analysis, all samples were degassed at  $200^\circ\text{C}$  for 6 h to desorb moisture and impurities from their surfaces. The pore size distributions were calculated using the Barrett-Joyner-Halenda (BJH) model from the desorption branch.

TEM measurements were performed on a JEM-2100 operating at an accelerated voltage of 200 kV. The sample was ultrasonicated in ethanol solution, and a drop was deposited on a copper grid covered with a holey carbon membrane for observation.

GC analyses was performed on an Agilent 7890A instrument (Column: Agilent 19091J-413:  $30\text{ m} \times 320\text{ }\mu\text{m} \times 0.25\text{ }\mu\text{m}$ , carrier gas:  $H_2$ , FID detection).

All catalytic reactions were carried out in pressure tubes by placing them into a heated aluminum block.

## 2. Preparation of catalysts

All catalysts mentioned in this work were prepared via the same procedure. A typical procedure for the preparation of the optimal catalyst (Co-L5@C-800) is as follows: In a round bottomed flask, 0.3 mmol of  $\text{Co}(\text{NO}_3)_2 \cdot 6\text{H}_2\text{O}$ , and 1 mmol of 1,2-phenylenediamine were stirred in methanol (100 mL) for 10 min at room temperature. Then, the carbon (Vulcan XC72R powder) support (2.0 g) without any treatment was added and the mixture was stirred overnight at RT (room temperature). After removing methanol by rotary evaporation at 45 °C, the resulting black solid material was grinded to give a fine powder, which was pyrolyzed under argon at 800 °C for 2 h. The cobalt mass loading in Co-L5@C-800 is found to be 0.937 wt% by ICP-OES analysis (Table 1). A series of catalysts were prepared through the same procedure by changing ligand, support, and calcination temperature. Different catalytic materials such as Co-L1@ZSM-5-800, Co-L1@TiO<sub>2</sub>-800, Co-L1@TiO<sub>2</sub>, Co-L1@Al<sub>2</sub>O<sub>3</sub>, Co-L1@MgO-Al<sub>2</sub>O<sub>3</sub>-800, Co @C-800, Co-L1@C-800, Co-L2@C-800, Co-L3@C-800, Co-L4@C-800, Co-L5@C-400, Co-L5@C-600 and Co-L5@C-1000, were prepared using the described protocol. The procedure, molar amounts or grams of reagents/components used in preparing these catalysts are as follows: 0.3 mmol of  $\text{Co}(\text{NO}_3)_2 \cdot 6\text{H}_2\text{O}$ , and 1 mmol of ligand were stirred in methanol (100 mL) for 10 min at room temperature. Then, the support (2.0 g) without any treatment was added and the mixture was stirred overnight at room temperature. After removing methanol by rotary evaporation at 45 °C, the resulting black solid material was grinded to give a fine powder, which was pyrolyzed under argon at a certain temperature for 2 h. Further, these obtained materials are used as catalysts.

## 3. Screening of bases and solvents

We screened many bases to optimize the reaction conditions (**Table S1**). It was clearly found that catalytic system without base is inactive toward the model reaction (**Table S1**, entry 1). The  $\text{Na}_2\text{CO}_3$ ,  $\text{K}_2\text{CO}_3$  and  $\text{NaHCO}_3$  involved systems did not show any reactivity, too (**Table S1**, entries 2-4). The bases  $\text{Cs}_2\text{CO}_3$ ,  $\text{K}_3\text{PO}_4$ , and  $\text{NaOH}$  exhibited lower to moderate product yields (**Table S1**, entries 5-7).  $\text{KOH}$  and  $t\text{-BuOK}$  showed similar yield of 96-97% (**Table S1**, entries 8-9). Due to the lower price of  $\text{KOH}$ , it was selected as the optimal base.

Next, we investigated the effect of  $\text{KOH}$  loading on the catalytic performance (**Figure S1**). The yield was gradually increased from 30% (0.05 mmol  $\text{KOH}$ ) to 97% (0.3 mmol  $\text{KOH}$ ). However, the yield could not be improved by further increasing the  $\text{KOH}$  loading. Thus, the optimal  $\text{KOH}$  loading is selected as 0.3 mmol.

**Table S1.** Screening the base for the *N*-alkylation of benzamide with benzyl alcohol.

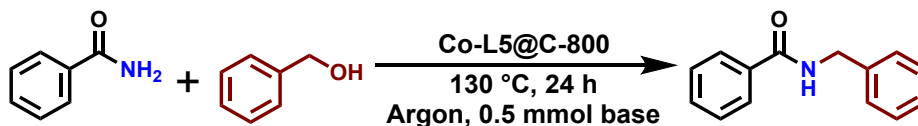

| Entry | Base type                       | Conversion, % | Yield, % |
|-------|---------------------------------|---------------|----------|
| 1     | without base                    | 0             | 0        |
| 2     | Na <sub>2</sub> CO <sub>3</sub> | 0             | 0        |
| 3     | K <sub>2</sub> CO <sub>3</sub>  | 0             | 0        |
| 4     | NaHCO <sub>3</sub>              | 0             | 0        |
| 5     | CsCO <sub>3</sub>               | 88            | 87       |
| 6     | K <sub>3</sub> PO <sub>4</sub>  | 68            | 67       |
| 7     | NaOH                            | 89            | 45       |
| 8     | <i>t</i> -BuOK                  | 97            | 96       |
| 9     | KOH                             | 98            | 97       |

**Reaction conditions:** 0.5 mmol benzamide, 0.55 mmol benzyl alcohol, 60 mg catalyst, 0.5 mmol base, 1 atm argon, 3 mL toluene, 130 °C, 24 h. Yields were determined by GC based on benzamide using *n*-hexadecane as standard.

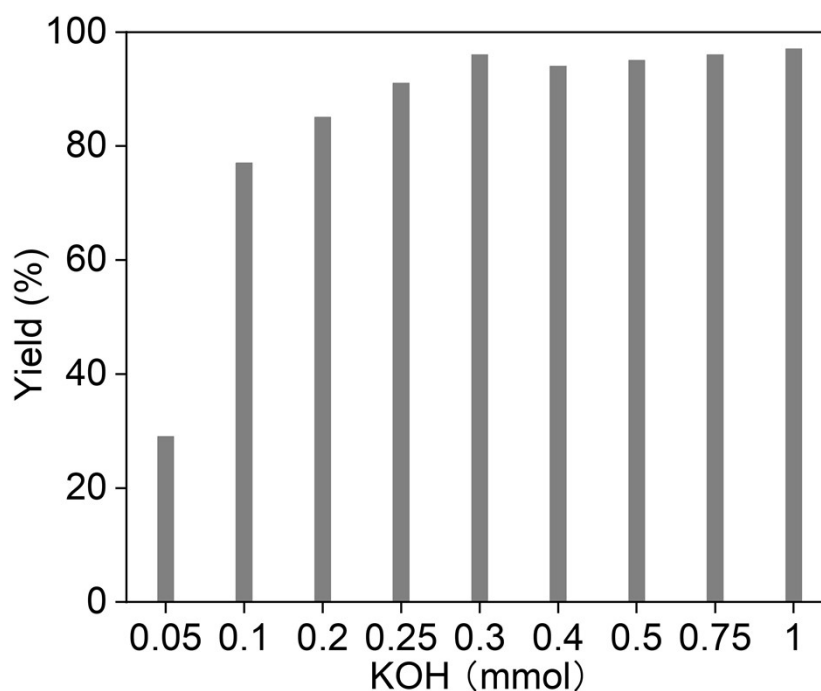

**Figure S1.** Screening the KOH loading for the *N*-alkylation of benzamide with benzyl alcohol. Reaction conditions: 0.5 mmol benzamide, 0.55 mmol benzyl alcohol, 60 mg catalyst, 1 atm argon, 3 mL toluene, 130 °C, 24 h. Yields were determined by GC based on benzamide using *n*-hexadecane as standard.

**Table S2.** Screening the solvents for the *N*-alkylation of benzamide with benzyl alcohol.

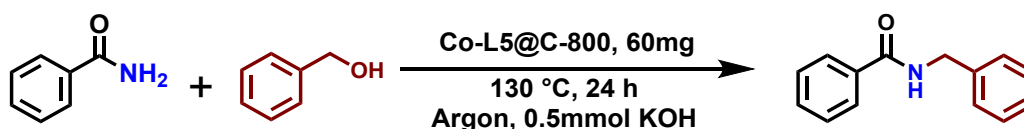

| Entry | Solvent         | Conversion, % | Yield, % |
|-------|-----------------|---------------|----------|
| 1     | Tetrahydrofuran | 16            | 15       |
| 2     | Methanol        | 0             | 0        |
| 3     | Ethanol         | 0             | 0        |
| 4     | Toluene         | 98            | 97       |
| 5     | n-hexane        | 35            | 34       |

**Reaction conditions:** 0.5 mmol benzamide, 0.55 mmol benzyl alcohol, 60 mg catalyst, 0.5 mmol KOH, 1 atm argon, 3 mL solvent, 130 °C, 24 h. Yields were determined by GC based on benzamide using n-hexadecane as standard.

**Table S3.** Screening the metal and ligand content.

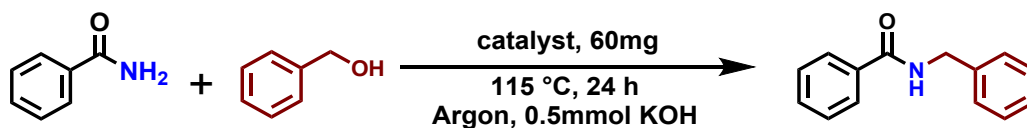

| Entry | catalyst       | Conversion, % | Yield, % |
|-------|----------------|---------------|----------|
| 1     | 0.5Co-L5@C-800 | 82            | 82       |
| 2     | Co-L5@C-800    | 87            | 87       |
| 3     | 1.5Co-L5@C-800 | 88            | 88       |
| 4     | Co-2L5@C-800   | 86            | 86       |
| 5     | Co-3.5L5@C-800 | 90            | 90       |

**Reaction conditions:** 0.5 mmol benzamide, 0.55 mmol benzyl alcohol, 60 mg catalyst, 0.5 mmol KOH, 1 atm argon, 3 mL solvent, 115 °C, 24 h. Yields were determined by GC based on benzamide using n-hexadecane as standard.

#### 4. General procedure for catalytic reactions

A 25 mL pressure tube was charged with magnetic stirring bar, 0.5 mmol benzamide, 0.55 mmol benzyl alcohol. Then, 3 mL of toluene was added followed by the addition of catalyst (60 mg). Then, the pressure tube was flushed with argon gas three times and fitted with septum and cap. The pressure tube was placed into an aluminum block preheated at 135 °C (placed 30 minutes before counting the

reaction time in order to attain reaction temperature) and the reactions were stirred for required time. During the reaction the inside temperature of the pressure tube was measured to be 130 °C and this temperature was used as the reaction temperature. After the completion of the reactions, the pressure tubes were taken out and products were analyzed by GC and GCMS. The corresponding products were purified by column chromatography (silica, n-hexane, ethyl acetate, methanol). The purified products were analyzed by NMR ( $^1\text{H}$ ,  $^{13}\text{C}$ ) and HRMS.

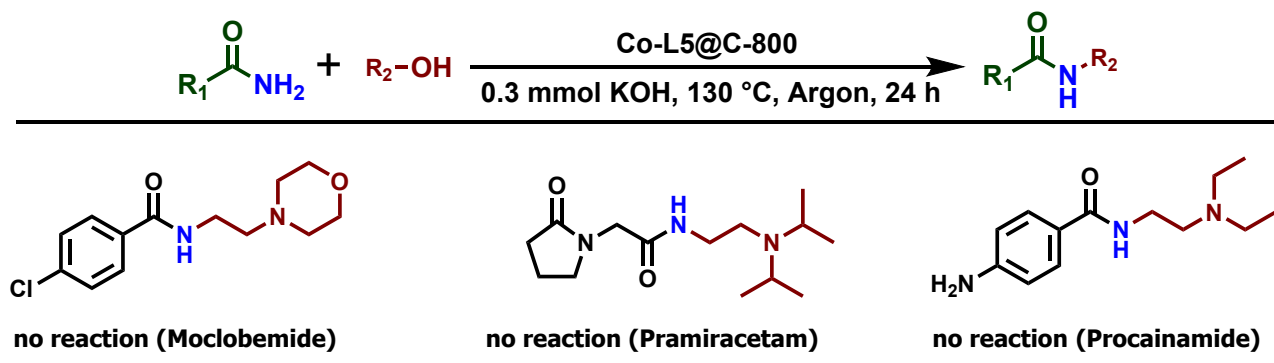

**Scheme S1.** Synthesis of selected drug molecules. Reaction conditions: 0.5mmol amide, 0.55 mmol alcohol, 60 mg Co-L5@C-800 (1.9 mol% Co), 0.3 mmol KOH, 3 mL toluene, 130 °C, 24 h, in 1 atm argon

**Catalyst recycling.** The procedure of catalyst recycling is as following: after the completion of each reaction, the catalyst was separated by centrifugation and washed with methanol followed by drying at 60 °C. Then, the catalyst was reused for the next run without reactivation.

## 5. Characterization of Co-materials

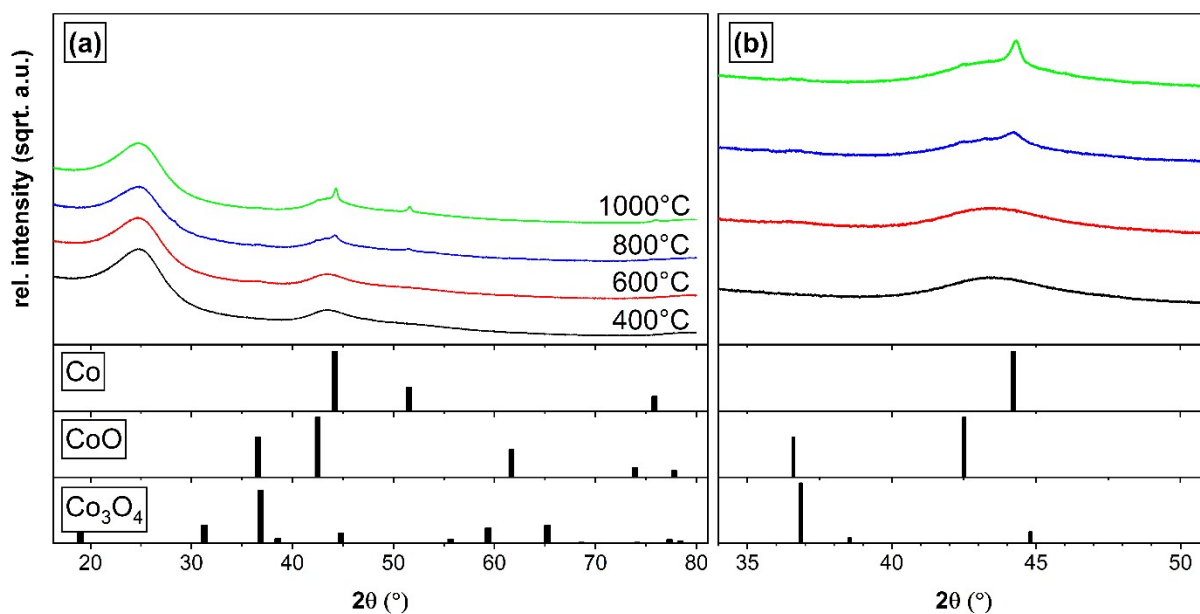

**Fig**

**Figure S2.** (a) Powder diffraction pattern of Co-L5@C-400, 600, 800 and 1000 and references, respectively (Co ICDD pdf 00-015-0806, CoO ICDD pdf 01-074-2391, Co<sub>3</sub>O<sub>4</sub> ICDD pdf 00-024-1467); (b) magnification of angular region  $34^{\circ} \leq 2\theta \leq 51^{\circ}$ .

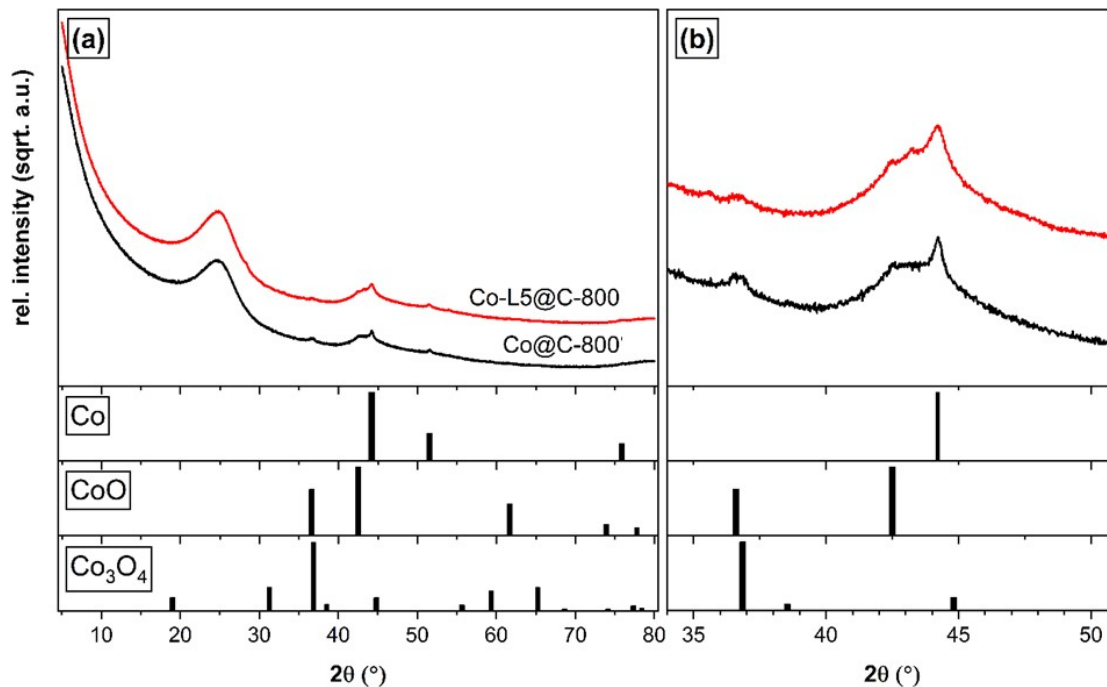

**Figure S3.** (a) Comparison of X-ray powder diffraction pattern of Co-L5@C-800, Co@C-800 and references, respectively (Co ICDD pdf 00-015-0806, CoO ICDD pdf 01-074-2391, Co<sub>3</sub>O<sub>4</sub> ICDD pdf 00-024-1467); (b) magnification of angular region  $32^{\circ} \leq 2\theta \leq 53^{\circ}$ .

**Table S4.** Elemental distribution of the Co@C-800 derived by EDX.

| Element   | Family | Atomic Fraction (%) | Mass Fraction (%) |
|-----------|--------|---------------------|-------------------|
| <b>C</b>  | k      | 98.9                | 97.5              |
| <b>N</b>  | k      | 0.0                 | 0.0               |
| <b>O</b>  | k      | 0.9                 | 1.1               |
| <b>Co</b> | k      | 0.3                 | 1.4               |

**Table S5.** Elemental distribution of the Co-L5@C-800 derived by EDX.

| Element   | Family | Atomic Fraction (%) | Mass Fraction (%) |
|-----------|--------|---------------------|-------------------|
| <b>C</b>  | k      | 97.6                | 93.7              |
| <b>N</b>  | k      | 0.0                 | 0.0               |
| <b>O</b>  | k      | 1.5                 | 1.9               |
| <b>Co</b> | k      | 0.9                 | 4.4               |

**Table S6.** Elemental composition of the near-surface region (at %) derived by XPS.

| Element   | Co-L5@C-400 | Co-L5@C-600 | Co-L5@C-800 | Co-L5@C-1000 | Co@C-800 |
|-----------|-------------|-------------|-------------|--------------|----------|
| <b>C</b>  | 96.8        | 97.9        | 97.3        | 98.8         | 98.3     |
| <b>N</b>  | 1.2         | 0.7         | 0.4         | 0.1          | 0.0      |
| <b>Co</b> | 0.3         | 0.2         | 0.1         | 0.1          | 0.1      |
| <b>O</b>  | 1.2         | 0.8         | 1.6         | 0.6          | 1.0      |
| <b>S</b>  | 0.2         | 0.1         | 0.2         | 0.2          | 0.2      |
| <b>Si</b> | 0.2         | 0.3         | 0.3         | 0.4          | 0.4      |

**Table S7.** The proportion of different forms of cobalt on the near-surface region (%) derived by XPS.

| Co form                            | Co-L5@C-400 | Co-L5@C-600 | Co-L5@C-800 | Co-L5@C-1000 | Co@C-800 |
|------------------------------------|-------------|-------------|-------------|--------------|----------|
| <b>Co<sup>0</sup></b>              | 0           | 0           | 12.0        | 22.7         | 0        |
| <b>Co<sub>x</sub>O<sub>y</sub></b> | 100         | 100         | 88.0        | 77.3         | 100      |

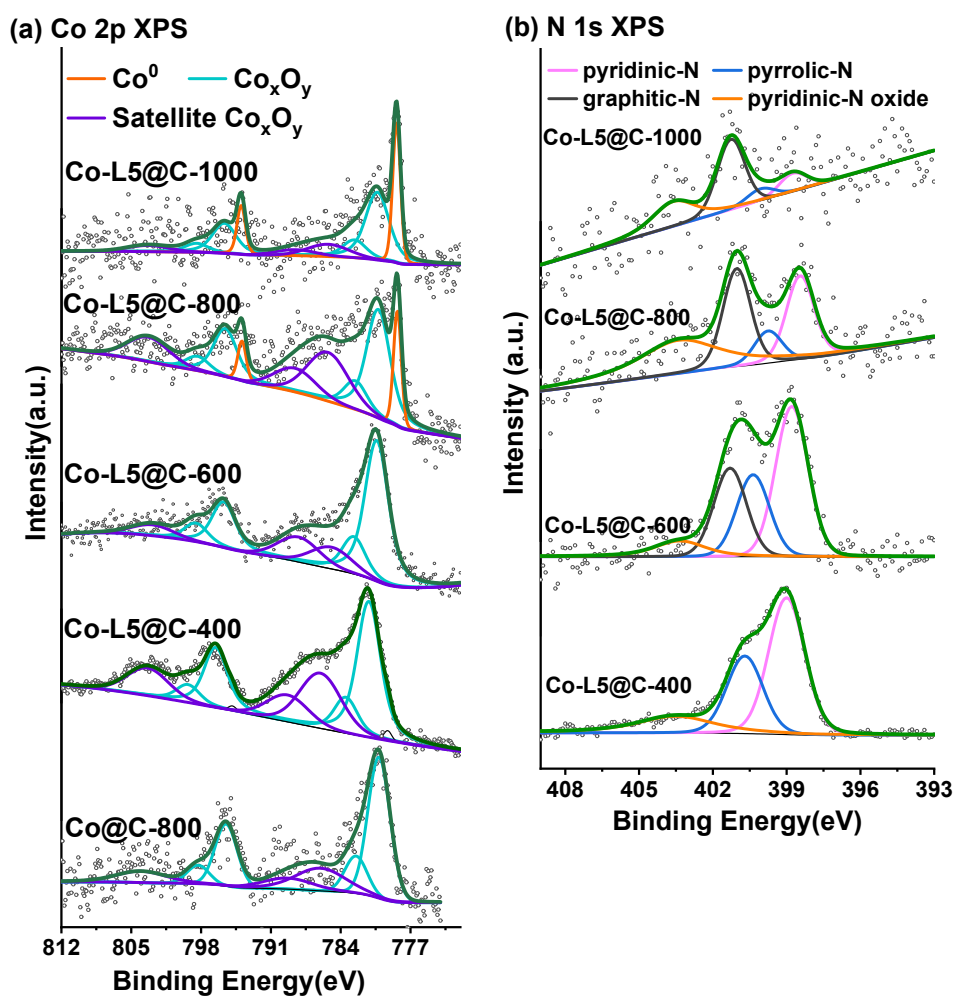

**Figure S4.** (a) Co 2p XPS and (b) N 1s XPS spectra of selected materials.

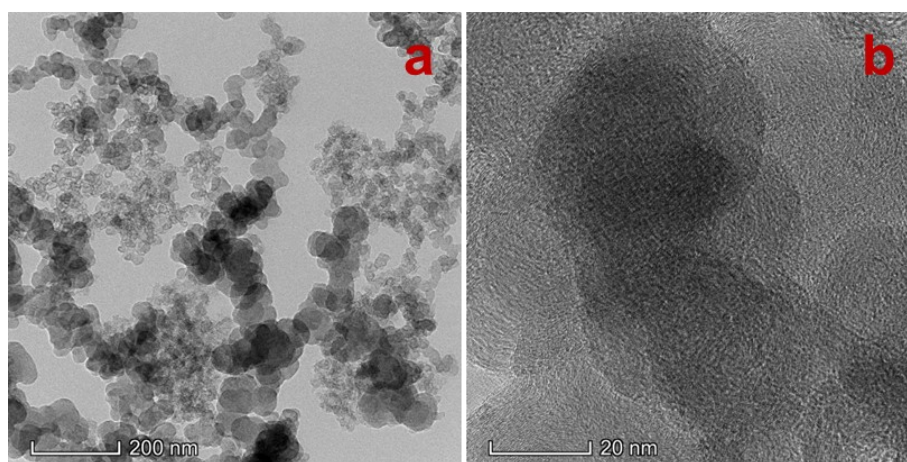

**Figure S5.** Structure characterization of Co-L5@C-400. (a-b) TEM images, (a) shows the metal complexes were uniformly distributed on the carbon support, (b) magnification TEM image at 20 nm.

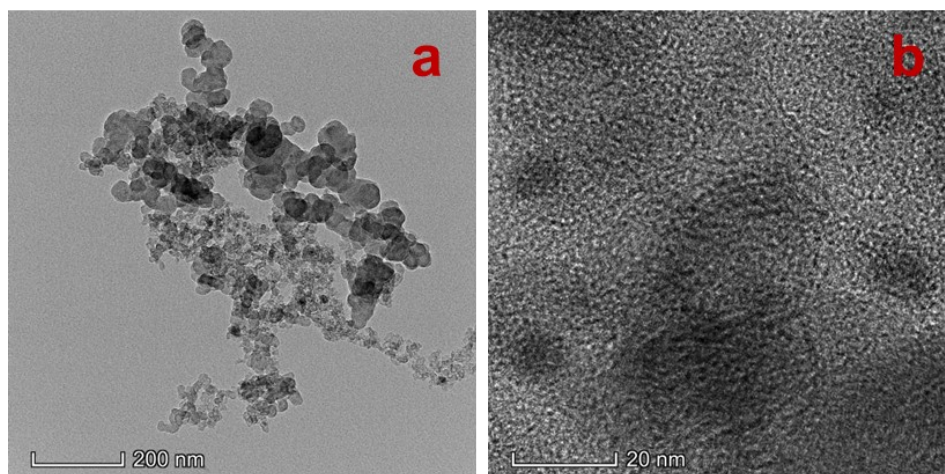

**Figure S6.** Structure characterization of Co-L5@C-600. (a-b) TEM images show (a) the metal complexes were uniformly distributed on the carbon support, (b) magnification TEM image at 20 nm.

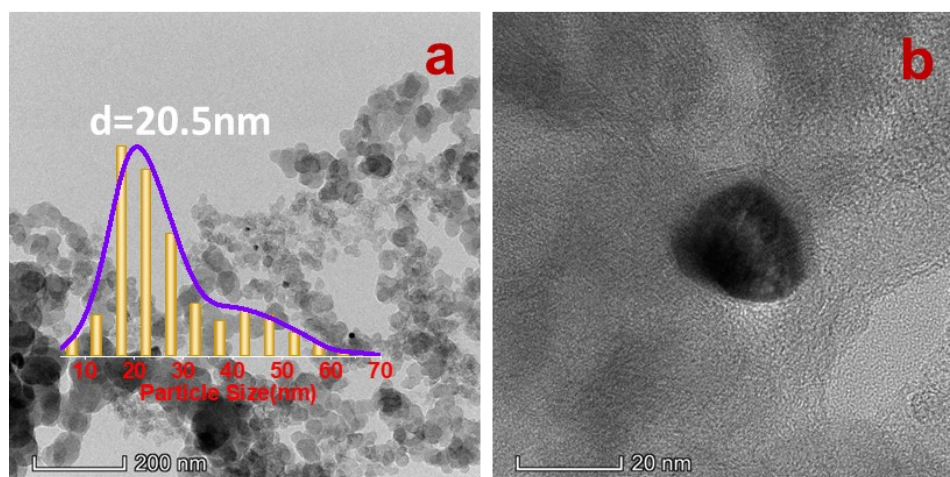

**Figure S7.** Structure characterization of Co-L5@C-1000. (a-b) TEM images, (a) shows the Co nanoparticles were distributed on the carbon support with an average diameter of 20.5 nm, (b) magnification TEM image at 20nm.

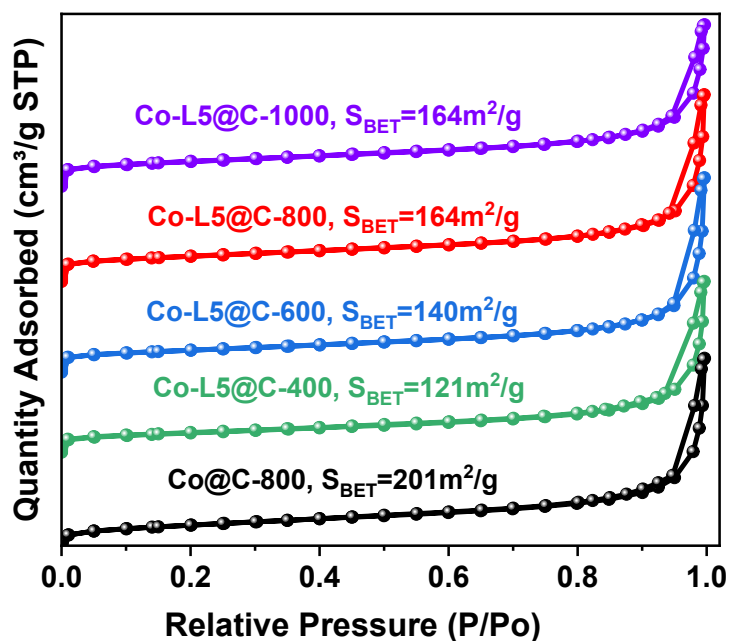

**Figure S8.** BET spectra of selected materials.

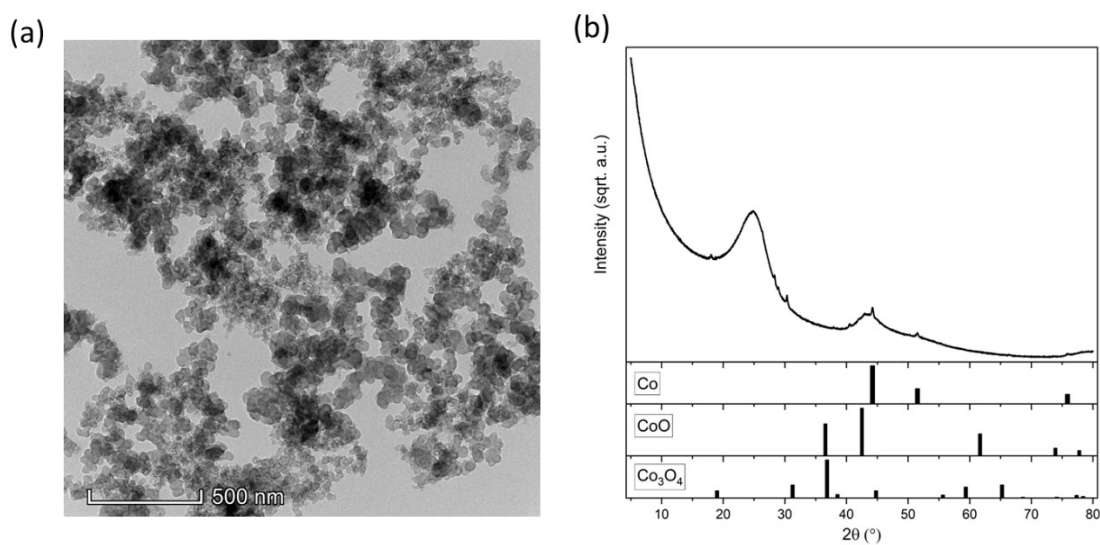

**Figure S9.** Characterization of catalyst Co-L5@C-800 after recycling. (a) TEM image, (b) Comparison of X-ray powder diffraction pattern of Co-L5@C-800, Co@C-800 and references, respectively (Co ICDD pdf 00-015-0806, CoO ICDD pdf 01-074-2391, Co<sub>3</sub>O<sub>4</sub> ICDD pdf 00-024-1467).

## 6. NMR data

NMR spectra were recorded on Bruker AV 300 and 400 spectrometers. All chemical shifts ( $\delta$ ) are reported in parts per million (ppm) and coupling constants ( $J$ ) in Hz. Mass spectra were recorded on an AMD 402/3 or a HP 5973 mass selective detector.

HRMS data were recorded on (1) ESI-HRMS: HPLC System 1200 /ESI-TOF-MS 6210 (Agilent) and (2) EI-HRMS: Mass Spectrometer MAT 95XP (Thermo Electron), 70eV. GC-MS was performed on an ISQ Trace 1300 in the electron ionization (EI) mode.

Isolated yields are reported. In the following, chemical shifts of the products are given.

### **1a:** N-(naphthalen-2-ylmethyl)benzamide<sup>[1]</sup>

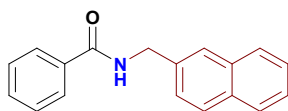

**<sup>1</sup>H NMR (300 MHz, CDCl<sub>3</sub>)**  $\delta$  7.87 – 7.77 (m, 6H), 7.54 – 7.39 (m, 6H), 6.75 (s, 1H), 4.79 (dd,  $J$  = 5.8, 0.8 Hz, 2H). **<sup>13</sup>C NMR (75 MHz, CDCl<sub>3</sub>)**  $\delta$  167.50, 135.70, 134.37, 133.40, 132.82, 131.60, 128.62, 127.78, 127.73, 127.06, 126.52, 126.33, 126.00, 77.52, 77.10, 76.67, 44.25.

### **1b:** N-(4-isopropylbenzyl)benzamide<sup>[2]</sup>

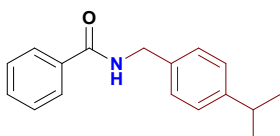

**<sup>1</sup>H NMR (300 MHz, DMSO)**  $\delta$  9.03 (t,  $J$  = 5.9 Hz, 1H), 7.99 – 7.88 (m, 2H), 7.58 – 7.42 (m, 3H), 7.29 – 7.23 (m, 2H), 7.22 – 7.17 (m, 2H), 4.48 (dd,  $J$  = 5.8, 1.7 Hz, 2H), 2.86 (pd,  $J$  = 7.0, 2.1 Hz, 1H), 1.20 (d,  $J$  = 2.6 Hz, 3H), 1.18 (d,  $J$  = 2.6 Hz, 3H). **<sup>13</sup>C NMR (75 MHz, DMSO)**  $\delta$  166.61, 147.36, 147.24, 137.57, 134.89, 131.64, 128.74, 127.80, 127.73, 127.07, 126.62, 126.38, 42.90, 40.83, 40.55, 40.27, 39.99, 39.71, 39.44, 39.16, 33.62, 24.45, 24.40.

### **1c:** N-(4-methoxybenzyl)benzamide<sup>[2]</sup>

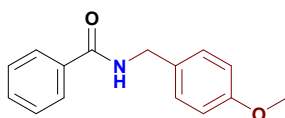

**<sup>1</sup>H NMR (300 MHz, CDCl<sub>3</sub>)**  $\delta$  7.74 – 7.64 (m, 2H), 7.42 – 7.34 (m, 1H), 7.18 – 7.13 (m, 2H), 6.79 – 6.74 (m, 2H), 6.59 (s, 1H), 4.44 (d,  $J$  = 5.6 Hz, 2H), 3.69 (s, 3H). **<sup>13</sup>C NMR (75 MHz, CDCl<sub>3</sub>)**  $\delta$  167.37, 159.06, 134.46, 131.48, 130.38, 129.27, 128.62, 128.54, 127.02, 114.12, 113.90, 77.54, 77.12, 76.69, 55.32, 43.57.

**1d:** N-(4-phenylbenzyl)benzamide<sup>[3]</sup>

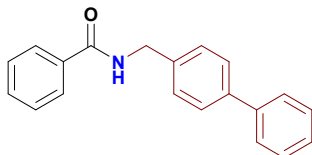

**<sup>1</sup>H NMR (300 MHz, DMSO)**  $\delta$  9.12 (t,  $J$  = 6.0 Hz, 1H), 8.01 – 7.89 (m, 2H), 7.68 – 7.61 (m, 4H), 7.59 – 7.29 (m, 8H), 4.55 (d,  $J$  = 6.2 Hz, 2H). **<sup>13</sup>C NMR (75 MHz, DMSO)**  $\delta$  166.71, 140.48, 139.44, 139.19, 139.03, 134.80, 131.74, 129.38, 128.81, 128.33, 127.78, 127.74, 127.51, 127.10, 127.05, 127.02, 126.86, 42.85, 40.82, 40.54, 40.26, 39.98, 39.70, 39.43, 39.15.

**1e:** N-(4-(benzyloxy)benzyl)benzamide

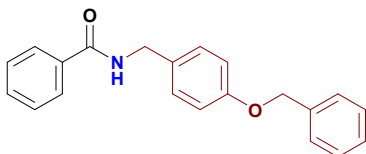

**<sup>1</sup>H NMR (300 MHz, CDCl<sub>3</sub>)**  $\delta$  7.88 – 7.75 (m, 1H), 7.58 – 7.21 (m, 9H), 7.02 – 6.94 (m, 2H), 6.57 (s, 1H), 5.09 (d,  $J$  = 2.7 Hz, 2H), 4.66 – 4.54 (m, 2H). **<sup>13</sup>C NMR (75 MHz, CDCl<sub>3</sub>)**  $\delta$  167.40, 158.37, 158.31, 137.00, 136.93, 134.42, 131.54, 130.59, 129.34, 128.67, 128.64, 128.59, 128.03, 128.00, 127.48, 127.01, 115.38, 115.14, 114.93, 77.53, 77.11, 76.68, 70.07, 70.05, 43.63.

**HRMS (ESI-TOF):**  $m/z$  calcd. for C<sub>21</sub>H<sub>19</sub>NO<sub>2</sub>+H<sup>+</sup> ([M+H<sup>+</sup>]) 318.1494, found 318.1502.

**1f:** N-(4-(trifluoromethyl)benzyl)benzamide<sup>[3]</sup>

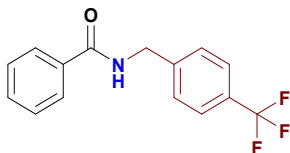

**<sup>1</sup>H NMR (300 MHz, DMSO)**  $\delta$  8.94 (t,  $J$  = 5.8 Hz, 1H), 8.01 – 7.87 (m, 2H), 7.58 – 7.43 (m, 3H), 7.30 – 7.23 (m, 1H), 7.21 – 7.12 (m, 3H), 4.49 (d,  $J$  = 5.9 Hz, 2H). **<sup>13</sup>C NMR (75 MHz, DMSO)**  $\delta$

166.69, 137.65, 135.95, 134.87, 131.67, 130.35, 128.77, 127.78, 127.75, 127.20, 126.19, 41.17, 40.83, 40.55, 40.28, 40.00, 39.72, 39.44, 39.16.

**1g:** N-(2-chlorobenzyl)benzamide<sup>[4]</sup>

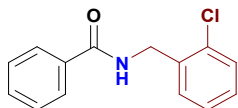

**<sup>1</sup>H NMR (400 MHz, CDCl<sub>3</sub>)**  $\delta$  7.85 – 7.77 (m, 2H), 7.53 – 7.29 (m, 6H), 7.25 – 7.22 (m, 1H), 6.88 (d,  $J$  = 59.5 Hz, 1H), 4.67 (dd,  $J$  = 34.3, 5.8 Hz, 2H). **<sup>13</sup>C NMR (101 MHz, CDCl<sub>3</sub>)**  $\delta$  167.51, 167.49, 138.30, 135.66, 134.38, 134.25, 133.62, 131.61, 131.53, 130.16, 129.55, 128.95, 128.75, 128.59, 128.56, 127.87, 127.55, 127.14, 127.07, 127.05, 77.44, 77.32, 77.12, 76.80, 44.07, 41.99.

**1h:** N-(3-chlorobenzyl)benzamide<sup>[5]</sup>

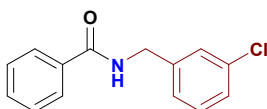

**<sup>1</sup>H NMR (300 MHz, DMSO)**  $\delta$  9.05 (t,  $J$  = 6.2 Hz, 1H), 7.94 – 7.87 (m, 2H), 7.63 – 7.44 (m, 4H), 7.34 – 7.31 (m, 3H), 4.58 – 4.45 (m, 2H). **<sup>13</sup>C NMR (75 MHz, DMSO)**  $\delta$  140.17, 131.71, 128.79, 128.75, 127.70, 127.65, 127.19, 43.05, 40.81, 40.53, 40.25, 39.97, 39.70, 39.42, 39.14.

**1j:** N-(4-bromobenzyl)benzamide<sup>[1]</sup>

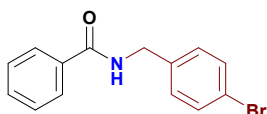

**<sup>1</sup>H NMR (300 MHz, CDCl<sub>3</sub>)**  $\delta$  7.58 – 7.47 (m, 4H), 7.37 (dddd,  $J$  = 8.3, 3.8, 2.8, 0.9 Hz, 4H), 7.31 – 7.12 (m, 1H), 4.68 (d,  $J$  = 7.1 Hz, 2H). **<sup>13</sup>C NMR (75 MHz, CDCl<sub>3</sub>)**  $\delta$  140.68, 139.89, 128.81, 127.49, 127.35, 127.12, 77.46, 77.04, 76.62, 65.43, 65.14, 29.73.

**1k:** N-(4-fluorobenzyl)benzamide<sup>[6]</sup>

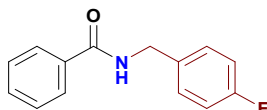

**<sup>1</sup>H NMR (400 MHz, CDCl<sub>3</sub>)**  $\delta$  7.83 – 7.77 (m, 2H), 7.54 – 7.48 (m, 1H), 7.45 – 7.40 (m, 2H), 7.28 (s, 2H), 7.11 – 6.94 (m, 2H), 4.62 – 4.54 (m, 2H). **<sup>13</sup>C NMR (101 MHz, CDCl<sub>3</sub>)**  $\delta$  167.48, 167.40, 163.74, 163.42, 161.29, 160.98, 134.41, 134.26, 134.17, 134.13, 131.63, 131.54, 129.57, 129.49, 129.37, 129.29, 128.60, 128.58, 127.03, 126.99, 115.66, 115.63, 115.45, 115.42, 115.09, 77.41, 77.09, 76.77, 43.32.

**1m:** N-((6-methylpyridin-3-yl)methyl)benzamide<sup>[8]</sup>

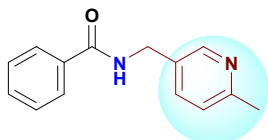

**<sup>1</sup>H NMR (300 MHz, DMSO)**  $\delta$  9.08 (t,  $J$  = 5.9 Hz, 1H), 8.43 (dd,  $J$  = 2.3, 0.8 Hz, 1H), 7.93 – 7.86 (m, 2H), 7.64 – 7.60 (m, 1H), 7.56 – 7.43 (m, 3H), 7.20 (d,  $J$  = 7.9 Hz, 1H), 4.47 (d,  $J$  = 5.9 Hz, 2H), 2.44 (d,  $J$  = 1.9 Hz, 3H). **<sup>13</sup>C NMR (75 MHz, DMSO)**  $\delta$  166.77, 156.78, 156.69, 148.61, 136.00, 134.66, 132.50, 131.76, 128.79, 127.70, 123.16, 122.99, 40.81, 40.66, 40.53, 40.25, 39.97, 39.70, 39.42, 39.14, 24.15, 24.11.

**1n:** N-(pyridin-3-ylmethyl)benzamide<sup>[9]</sup>

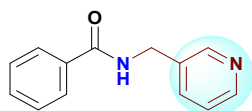

**<sup>1</sup>H NMR (300 MHz, DMSO)**  $\delta$  9.26 – 9.07 (m, 1H), 8.60 – 8.44 (m, 2H), 8.06 – 7.86 (m, 2H), 7.81 – 7.67 (m, 1H), 7.57 – 7.31 (m, 4H), 4.58 – 4.48 (m, 2H). **<sup>13</sup>C NMR (75 MHz, DMSO)**  $\delta$  166.85, 151.17, 151.12, 149.31, 148.58, 148.51, 148.48, 137.07, 135.62, 134.58, 131.80, 129.75, 128.80, 128.50, 127.75, 123.94, 40.90, 40.78, 40.50, 40.22, 39.94, 39.66, 39.39, 39.11.

**1o:** N-(pyridin-2-ylmethyl)benzamide<sup>[8]</sup>

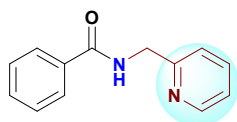

**<sup>1</sup>H NMR (300 MHz, CDCl<sub>3</sub>)**  $\delta$  8.58 – 8.49 (m, 1H), 7.92 – 7.38 (m, 6H), 7.21 (s, 2H), 4.82 – 4.70 (m, 2H). **<sup>13</sup>C NMR (75 MHz, CDCl<sub>3</sub>)**  $\delta$  167.45, 156.37, 148.92, 148.48, 136.92, 136.73, 134.33, 131.49, 128.56, 128.52, 128.50, 127.13, 122.45, 122.28, 122.24, 120.58, 77.54, 77.11, 76.69, 44.76.

**1p:** N-(furan-2-ylmethyl)benzamide<sup>[6]</sup>

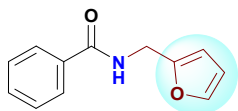

**<sup>1</sup>H NMR (300 MHz, DMSO)**  $\delta$  8.97 (t,  $J$  = 5.7 Hz, 1H), 8.05 – 7.79 (m, 2H), 7.61 – 7.40 (m, 4H), 6.40 (ddd,  $J$  = 3.8, 3.2, 1.8 Hz, 1H), 6.28 (dp,  $J$  = 2.8, 0.9 Hz, 1H), 4.48 (dd,  $J$  = 5.8, 0.9 Hz, 2H). **<sup>13</sup>C NMR (75 MHz, DMSO)**  $\delta$  166.53, 152.92, 142.56, 142.46, 134.58, 131.77, 128.77, 127.75, 110.95, 110.75, 107.31, 107.29, 40.82, 40.54, 40.26, 39.99, 39.71, 39.43, 39.15, 36.51.

**1q:** N-(thiophen-2-ylmethyl)benzamide<sup>[6]</sup>

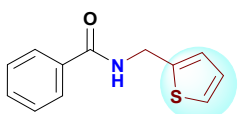

**<sup>1</sup>H NMR (300 MHz, CDCl<sub>3</sub>)**  $\delta$  7.83 – 7.78 (m, 2H), 7.55 – 7.49 (m, 1H), 7.47 – 7.40 (m, 2H), 7.26 (s, 1H), 7.05 (dq,  $J$  = 3.4, 0.9 Hz, 1H), 6.99 (dd,  $J$  = 5.1, 3.5 Hz, 1H), 6.67 (d,  $J$  = 17.0 Hz, 1H), 4.82 (dd,  $J$  = 5.6, 0.8 Hz, 2H).

**<sup>13</sup>C NMR (75 MHz, CDCl<sub>3</sub>)**  $\delta$  167.20, 140.83, 134.16, 131.66, 128.61, 128.59, 127.04, 126.98, 126.90, 126.25, 125.36, 124.97, 77.50, 77.07, 76.65, 39.11, 38.84.

**1r:** N-(4-cyanobenzyl)benzamide<sup>[2]</sup>

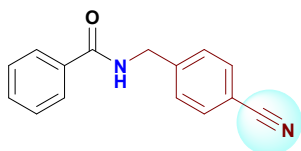

**<sup>1</sup>H NMR (300 MHz, DMSO)**  $\delta$  9.09 (t,  $J$  = 6.0 Hz, 1H), 7.94 – 7.88 (m, 2H), 7.86 – 7.80 (m, 2H), 7.58 – 7.45 (m, 2H), 7.42 – 7.25 (m, 3H), 4.54 (t,  $J$  = 5.8 Hz, 2H). **<sup>13</sup>C NMR (75 MHz, DMSO)**  $\delta$  168.29, 146.37, 133.09, 129.04, 128.83, 128.01, 127.81, 127.35, 126.40, 62.94, 40.80, 40.53, 40.25, 39.97, 39.69, 39.41, 39.13.

**1s:** N-(4-vinylbenzyl)benzamide

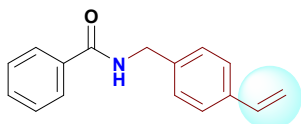

**<sup>1</sup>H NMR (300 MHz, DMSO)**  $\delta$  9.04 (t,  $J$  = 6.0 Hz, 1H), 7.94 – 7.86 (m, 2H), 7.59 – 7.40 (m, 5H), 7.34 – 7.26 (m, 2H), 6.72 (dd,  $J$  = 17.7, 10.9 Hz, 1H), 5.80 (dd,  $J$  = 17.7, 1.1 Hz, 1H), 5.27 – 5.19 (m, 1H), 4.48 (d,  $J$  = 6.0 Hz, 2H). **<sup>13</sup>C NMR (75 MHz, DMSO)**  $\delta$  166.66, 136.87, 131.72, 128.79, 127.95, 127.70, 126.55, 114.29, 42.87, 40.83, 40.55, 40.28, 40.00, 39.72, 39.44, 39.16.

**HRMS** (ESI-TOF):  $m/z$  calcd. for C<sub>16</sub>H<sub>15</sub>NO+H<sup>+</sup> ([M+H<sup>+</sup>]) 238.1232, found 238.1229.

**1t:** N-(3-(pyrimidin-5-yl)benzyl)benzamide

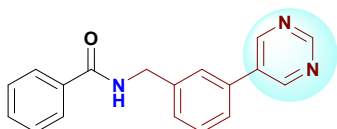

**<sup>1</sup>H NMR (300 MHz, DMSO)**  $\delta$  9.17 (d,  $J$  = 0.9 Hz, 1H), 9.09 (d,  $J$  = 1.7 Hz, 3H), 7.97 – 7.82 (m, 2H), 7.76 – 7.70 (m, 1H), 7.66 (ddd,  $J$  = 7.5, 1.9, 1.4 Hz, 1H), 7.53 – 7.39 (m, 5H), 4.57 (dd,  $J$  = 5.9, 3.8 Hz, 2H). **<sup>13</sup>C NMR (75 MHz, DMSO)**  $\delta$  166.83, 157.78, 157.71, 155.16, 155.14, 141.35, 134.76, 134.23, 133.72, 131.75, 129.85, 129.60, 128.80, 128.21, 127.76, 127.46, 126.46, 125.90, 125.75, 125.38, 43.08, 40.80, 40.52, 40.25, 39.97, 39.69, 39.41, 39.13.

**HRMS** (ESI-TOF):  $m/z$  calcd. for C<sub>18</sub>H<sub>15</sub>N<sub>3</sub>O+Na<sup>+</sup> ([M+Na<sup>+</sup>]) 312.1107, found 312.1110.

**1u:** N-(4-((1H-1,2,4-triazol-1-yl) methyl)benzyl)benzamide

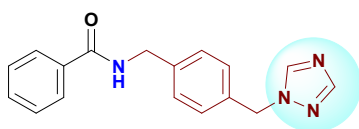

**<sup>1</sup>H NMR (300 MHz, DMSO)**  $\delta$  9.08 (t,  $J$  = 6.0 Hz, 1H), 8.68 (s, 1H), 8.00 (s, 1H), 7.96 – 7.90 (m, 2H), 7.55 – 7.43 (m, 3H), 7.37 – 7.23 (m, 4H), 5.41 (s, 2H), 4.50 (d,  $J$  = 6.0 Hz, 2H). **<sup>13</sup>C NMR (75 MHz, DMSO)**  $\delta$  166.76, 152.18, 144.60, 139.99, 135.23, 134.80, 131.72, 128.78, 128.41, 128.01, 127.74, 52.37, 42.87, 40.80, 40.53, 40.25, 39.97, 39.69, 39.41, 39.13.

**HRMS** (ESI-TOF):  $m/z$  calcd. for C<sub>17</sub>H<sub>16</sub>N<sub>4</sub>O+H<sup>+</sup> ([M+H<sup>+</sup>]) 293.1402, found 293.1403.

**2a:** N-benzyl-4-methoxybenzamide<sup>[11]</sup>

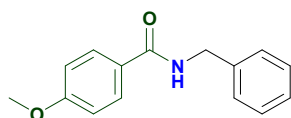

**<sup>1</sup>H NMR (400 MHz, DMSO)**  $\delta$  8.92 (t,  $J$  = 6.0 Hz, 1H), 7.95 – 7.87 (m, 2H), 7.33 (d,  $J$  = 4.6 Hz, 4H), 7.28 – 7.21 (m, 1H), 7.05 – 6.98 (m, 2H), 4.49 (d,  $J$  = 6.0 Hz, 2H), 3.81 (s, 3H). **<sup>13</sup>C NMR (101**

**MHz, DMSO)**  $\delta$  166.19, 162.07, 140.39, 129.56, 128.72, 127.65, 127.14, 127.03, 113.98, 55.80, 43.01, 40.60, 40.39, 40.18, 39.97, 39.76, 39.55, 39.34.

**2b:** 4-methoxy-N-(2-methylbenzyl)benzamide

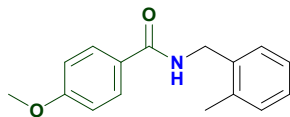

**<sup>1</sup>H NMR (300 MHz, CDCl<sub>3</sub>)**  $\delta$  7.82 – 7.72 (m, 2H), 7.41 – 7.09 (m, 4H), 6.98 – 6.87 (m, 2H), 6.36 (s, 1H), 4.62 (d,  $J$  = 5.3 Hz, 2H), 3.85 (s, 3H), 2.37 (s, 3H). **<sup>13</sup>C NMR (75 MHz, CDCl<sub>3</sub>)**  $\delta$  166.82, 162.21, 136.60, 136.01, 130.59, 128.81, 128.63, 127.81, 126.61, 126.26, 113.76, 77.52, 77.09, 76.67, 55.42, 42.26, 19.08.

**HRMS (ESI-TOF):**  $m/z$  calcd. for C<sub>16</sub>H<sub>17</sub>NO<sub>2</sub>+H<sup>+</sup> ([M+H<sup>+</sup>]) 256.1337, found 256.1340.

**2d:** N-benzyl-3,4,5-trimethoxybenzamide<sup>[13]</sup>

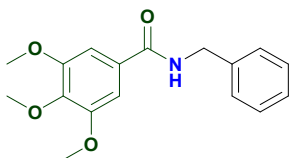

**<sup>1</sup>H NMR (400 MHz, DMSO)**  $\delta$  9.01 (t,  $J$  = 6.0 Hz, 1H), 7.35 – 7.32 (m, 4H), 7.28 – 7.23 (m, 3H), 4.50 (d,  $J$  = 5.9 Hz, 2H), 3.84 (s, 6H), 3.71 (s, 3H). **<sup>13</sup>C NMR (101 MHz, DMSO)**  $\delta$  166.03, 153.07, 140.43, 140.17, 129.88, 128.77, 128.51, 127.72, 127.24, 127.09, 126.88, 105.28, 60.54, 56.45, 43.17, 40.59, 40.38, 40.17, 39.96, 39.76, 39.55, 39.34.

**2e:** 3,4,5-trimethoxy-N-(2-methylbenzyl)benzamide

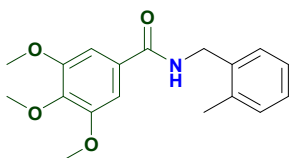

**<sup>1</sup>H NMR (300 MHz, CDCl<sub>3</sub>)**  $\delta$  7.36 – 7.31 (m, 1H), 7.28 – 7.20 (m, 3H), 7.03 (s, 2H), 6.17 (s, 1H), 4.67 (d,  $J$  = 5.3 Hz, 2H), 3.91 (d,  $J$  = 5.4 Hz, 9H), 2.41 (s, 3H). **<sup>13</sup>C NMR (75 MHz, CDCl<sub>3</sub>)**  $\delta$  153.26, 130.72, 128.87, 128.01, 126.32, 104.40, 77.45, 77.03, 76.61, 60.93, 56.41, 42.51, 19.13.

**HRMS (ESI-TOF):**  $m/z$  calcd. for C<sub>18</sub>H<sub>21</sub>NO<sub>4</sub>+H<sup>+</sup> ([M+H<sup>+</sup>]) 316.1549 found 316.1553.

**2f:** N-benzyl-2-(naphthalen-1-yl)acetamide<sup>[14]</sup>

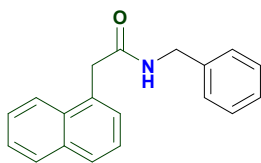

**<sup>1</sup>H NMR (300 MHz, DMSO)**  $\delta$  8.65 (t,  $J$  = 5.9 Hz, 1H), 8.16 – 8.08 (m, 1H), 7.96 – 7.90 (m, 1H), 7.86 – 7.79 (m, 1H), 7.55 – 7.50 (m, 2H), 7.48 – 7.43 (m, 2H), 7.32 – 7.21 (m, 5H), 4.30 (d,  $J$  = 5.9 Hz, 2H), 3.98 (s, 2H). **<sup>13</sup>C NMR (75 MHz, DMSO)**  $\delta$  170.55, 139.97, 133.83, 133.25, 132.44, 128.84, 128.71, 128.33, 127.70, 127.54, 127.23, 126.37, 126.11, 125.99, 124.78, 42.74, 40.83, 40.55, 40.27, 39.99, 39.72, 39.44, 39.16.

**2g:** N-benzyl-4-fluorobenzamide<sup>[6]</sup>

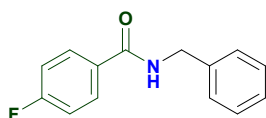

**<sup>1</sup>H NMR (400 MHz, DMSO)**  $\delta$  9.07 (dt,  $J$  = 10.9, 5.9 Hz, 1H), 8.04 – 7.85 (m, 2H), 7.52 – 7.45 (m, 1H), 7.40 – 7.28 (m, 5H), 7.25 (dddd,  $J$  = 7.1, 4.3, 3.2, 1.7 Hz, 1H), 4.49 (dd,  $J$  = 6.0, 3.1 Hz, 2H). **<sup>13</sup>C NMR (101 MHz, DMSO)**  $\delta$  166.69, 165.64, 165.60, 140.16, 140.04, 134.80, 131.72, 131.27, 131.24, 130.41, 130.32, 128.80, 128.76, 128.51, 127.71, 127.68, 127.66, 127.24, 127.20, 126.88, 115.83, 115.61, 43.13, 43.07, 40.59, 40.38, 40.17, 39.96, 39.75, 39.54, 39.33.

**2h:** 4-fluoro-N-(2-methylbenzyl)benzamide<sup>[15]</sup>

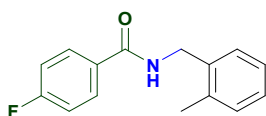

**<sup>1</sup>H NMR (300 MHz, CDCl<sub>3</sub>)**  $\delta$  7.86 – 7.74 (m, 2H), 7.52 – 7.40 (m, 1H), 7.34 – 7.28 (m, 1H), 7.28 – 7.18 (m, 3H), 7.13 – 7.07 (m, 1H), 6.38 (s, 1H), 4.64 (dd,  $J$  = 5.4, 4.1 Hz, 2H), 2.38 (d,  $J$  = 1.9 Hz, 3H). **<sup>13</sup>C NMR (75 MHz, CDCl<sub>3</sub>)**  $\delta$  167.30, 166.42, 166.23, 163.08, 136.63, 136.60, 135.76, 135.67, 134.35, 131.57, 130.67, 130.54, 129.38, 129.27, 128.70, 128.62, 127.97, 127.94, 126.96, 126.32, 115.76, 115.47, 77.49, 77.07, 76.65, 42.40, 42.36, 19.08.

**2i:** N-benzyl-4-(trifluoromethyl)benzamide<sup>[7]</sup>

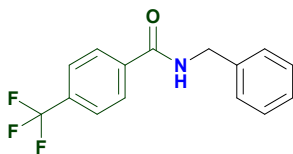

**<sup>1</sup>H NMR (300 MHz, DMSO)**  $\delta$  9.29 (t,  $J$  = 5.9 Hz, 1H), 8.14 – 8.06 (m, 2H), 7.90 – 7.82 (m, 2H), 7.36 – 7.21 (m, 5H), 4.52 (d,  $J$  = 6.0 Hz, 2H). **<sup>13</sup>C NMR (75 MHz, DMSO)**  $\delta$  165.55, 139.76, 138.56, 131.86, 131.44, 128.79, 128.65, 127.73, 127.31, 126.22, 125.91, 125.86, 125.81, 125.75, 122.61, 43.24, 40.81, 40.53, 40.25, 39.98, 39.70, 39.42, 39.14.

**2j:** N-benzyl-2-(3,6-bis(hexyloxy)-9H-xanthen-9-yl)benzamide

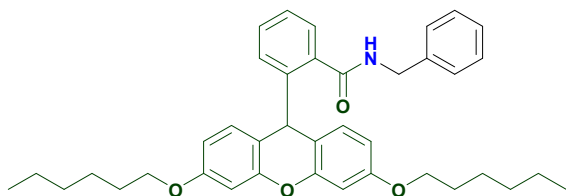

**<sup>1</sup>H NMR (300 MHz, CDCl<sub>3</sub>)**  $\delta$  7.42 – 7.30 (m, 6H), 7.25 (ddd,  $J$  = 8.1, 6.9, 1.5 Hz, 1H), 7.10 (ddd,  $J$  = 22.9, 8.0, 0.9 Hz, 4H), 6.70 (d,  $J$  = 2.5 Hz, 2H), 6.61 (t,  $J$  = 5.8 Hz, 1H), 6.52 (dd,  $J$  = 8.5, 2.6 Hz, 2H), 5.83 (s, 1H), 4.62 (d,  $J$  = 5.8 Hz, 2H), 3.95 (t,  $J$  = 6.5 Hz, 4H), 1.88 – 1.76 (m, 4H), 1.56 – 1.34 (m, 12H), 1.03 – 0.92 (m, 6H). **<sup>13</sup>C NMR (75 MHz, CDCl<sub>3</sub>)**  $\delta$  169.97, 158.83, 151.53, 151.49, 146.16, 138.23, 135.14, 131.25, 130.80, 130.74, 128.85, 128.29, 127.94, 127.67, 126.40, 126.17, 116.83, 110.73, 101.71, 77.63, 77.20, 76.78, 68.17, 44.12, 38.54, 31.66, 29.26, 25.81, 22.74, 22.69, 14.15.

**HRMS (ESI-TOF):**  $m/z$  calcd. for C<sub>39</sub>H<sub>45</sub>NO<sub>4</sub>+H<sup>+</sup> ([M+H<sup>+</sup>]) 592.3427, found 592.3438.

**2k:** N-benzylcyclopropanecarboxamide<sup>[16]</sup>

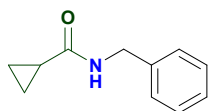

**<sup>1</sup>H NMR (300 MHz, DMSO)**  $\delta$  8.55 (s, 1H), 7.36 – 7.21 (m, 5H), 4.29 (d,  $J$  = 5.9 Hz, 2H), 1.66 – 1.55 (m, 1H), 0.94 – 0.55 (m, 4H). **<sup>13</sup>C NMR (75 MHz, DMSO)**  $\delta$  173.03, 140.16, 128.76, 128.71, 127.75, 127.62, 127.21, 127.14, 42.71, 42.43, 40.82, 40.55, 40.27, 39.99, 39.72, 39.44, 39.16, 14.13, 14.03, 6.71.

**2l: N-benzylpentanamide**<sup>[17]</sup>

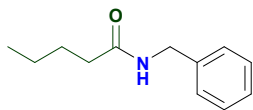

**<sup>1</sup>H NMR (300 MHz, DMSO)**  $\delta$  8.29 (s, 1H), 7.52 – 6.90 (m, 5H), 4.26 (d,  $J$  = 5.9 Hz, 2H), 2.19 – 2.10 (m, 2H), 1.58 – 1.45 (m, 2H), 1.35 – 1.20 (m, 2H), 0.92 – 0.82 (m, 3H). **<sup>13</sup>C NMR (75 MHz, DMSO)**  $\delta$  172.58, 140.24, 128.71, 127.61, 127.13, 42.43, 40.83, 40.55, 40.27, 39.99, 39.72, 39.44, 39.16, 35.54, 27.95, 22.30, 14.19.

**2m: 4-amino-N-benzylbenzamide**<sup>[18]</sup>

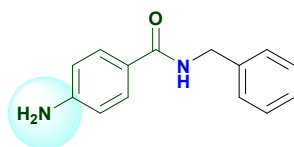

**<sup>1</sup>H NMR (300 MHz, CDCl<sub>3</sub>)**  $\delta$  7.69 – 7.59 (m, 2H), 7.42 – 7.29 (m, 5H), 6.73 – 6.58 (m, 2H), 6.34 (s, 1H), 4.63 (d,  $J$  = 5.7 Hz, 2H), 4.32 – 3.55 (m, 2H). **<sup>13</sup>C NMR (75 MHz, CDCl<sub>3</sub>)**  $\delta$  167.11, 149.68, 138.66, 128.76, 128.73, 127.91, 127.48, 123.88, 114.16, 77.48, 77.06, 76.63, 43.98.

**2n: N-benzylisonicotinamide**<sup>[8]</sup>

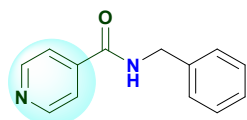

**<sup>1</sup>H NMR (300 MHz, DMSO)**  $\delta$  9.35 (t,  $J$  = 6.0 Hz, 1H), 8.77 – 8.71 (m, 2H), 7.84 – 7.79 (m, 2H), 7.37 – 7.23 (m, 5H), 4.52 (d,  $J$  = 6.0 Hz, 2H). **<sup>13</sup>C NMR (75 MHz, DMSO)**  $\delta$  165.17, 150.75, 141.71, 139.57, 128.82, 127.75, 127.37, 121.74, 43.19, 40.80, 40.52, 40.24, 39.97, 39.69, 39.41, 39.13.

**2o: N-benzylnicotinamide**<sup>[19]</sup>

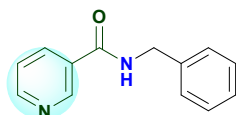

**<sup>1</sup>H NMR (300 MHz, CDCl<sub>3</sub>)**  $\delta$  8.83 (d,  $J$  = 89.3 Hz, 2H), 8.15 (d,  $J$  = 7.9 Hz, 1H), 6.97 (s, 1H), 4.65 (d,  $J$  = 5.6 Hz, 2H). **<sup>13</sup>C NMR (75 MHz, CDCl<sub>3</sub>)**  $\delta$  165.52, 152.07, 147.83, 137.79, 135.37, 128.85, 127.97, 127.77, 77.49, 77.06, 76.64, 44.19.

**2p:** N-benzylthiophene-3-carboxamide<sup>[19]</sup>

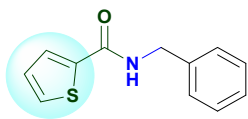

**<sup>1</sup>H NMR (400 MHz, DMSO)**  $\delta$  8.88 (t,  $J$  = 6.1 Hz, 1H), 8.18 (dd,  $J$  = 3.0, 1.3 Hz, 1H), 7.61 – 7.54 (m, 2H), 7.36 – 7.31 (m, 4H), 7.25 (ddd,  $J$  = 8.7, 3.7, 2.5 Hz, 1H), 4.46 (d,  $J$  = 6.0 Hz, 2H). **<sup>13</sup>C NMR (101 MHz, DMSO)**  $\delta$  162.52, 140.14, 138.15, 129.26, 128.76, 128.51, 127.69, 127.30, 127.23, 42.74, 40.60, 40.39, 40.18, 40.08, 39.97, 39.76, 39.55, 39.34.

**2q:** N-benzylbenzo[b]thiophene-2-carboxamide<sup>[20]</sup>

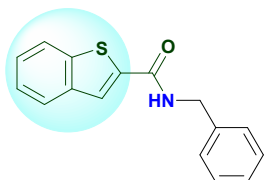

**<sup>1</sup>H NMR (400 MHz, DMSO)**  $\delta$  9.35 (t,  $J$  = 6.0 Hz, 1H), 8.16 (d,  $J$  = 0.8 Hz, 1H), 8.06 – 8.00 (m, 1H), 7.97 – 7.92 (m, 1H), 7.49 – 7.42 (m, 2H), 7.38 – 7.32 (m, 4H), 7.29 – 7.23 (m, 1H), 4.52 (d,  $J$  = 6.0 Hz, 2H). **<sup>13</sup>C NMR (101 MHz, DMSO)**  $\delta$  162.03, 140.70, 140.33, 139.71, 139.66, 128.84, 128.59, 128.51, 127.83, 127.39, 126.89, 126.69, 125.67, 125.39, 125.34, 123.27, 43.19, 40.58, 40.37, 40.17, 40.09, 39.96, 39.75, 39.54, 39.33.

**2r:** N-(2-methylbenzyl) benzo[b]thiophene-2-carboxamide

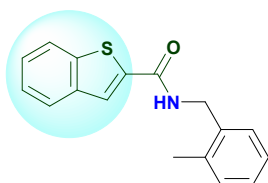

**<sup>1</sup>H NMR (300 MHz, DMSO)**  $\delta$  9.19 (t,  $J$  = 5.7 Hz, 1H), 8.19 (d,  $J$  = 0.8 Hz, 1H), 8.09 – 7.99 (m, 1H), 7.97 – 7.91 (m, 1H), 7.51 – 7.41 (m, 2H), 7.33 – 7.26 (m, 1H), 7.21 – 7.15 (m, 3H), 4.49 (d,  $J$  = 5.7 Hz, 2H), 2.34 (s, 3H). **<sup>13</sup>C NMR (75 MHz, DMSO)**  $\delta$  161.94, 140.68, 140.34, 139.69, 137.20, 136.15, 130.45, 128.14, 127.45, 126.66, 126.26, 125.65, 125.37, 123.27, 41.33, 40.82, 40.54, 40.26, 39.98, 39.71, 39.43, 39.15, 19.21.

**HRMS (ESI-TOF):**  $m/z$  calcd. for C<sub>17</sub>H<sub>15</sub>NOS+H<sup>+</sup> ([M+H<sup>+</sup>]) 282.0952, found 282.0952.

**2s:** N-(4-((trifluoromethyl)thio)benzyl)nicotinamide

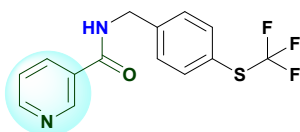

**<sup>1</sup>H NMR (300 MHz, CDCl<sub>3</sub>)**  $\delta$  9.07 (d,  $J$  = 2.3 Hz, 1H), 8.73 (dd,  $J$  = 4.9, 1.7 Hz, 1H), 8.21 (ddd,  $J$  = 7.9, 2.3, 1.7 Hz, 1H), 7.68 – 7.63 (m, 2H), 7.46 – 7.41 (m, 3H), 6.97 (s, 1H), 4.77 – 4.68 (m, 2H).

**<sup>13</sup>C NMR (75 MHz, CDCl<sub>3</sub>)**  $\delta$  165.47, 152.08, 147.60, 141.02, 136.78, 136.53, 135.74, 129.98, 128.86, 127.65, 123.78, 77.46, 77.03, 76.61, 43.56.

**HRMS (ESI-TOF):**  $m/z$  calcd. for C<sub>14</sub>H<sub>11</sub>N<sub>2</sub>OSF<sub>3</sub>+H<sup>+</sup> ([M+H<sup>+</sup>]) 313.0622, found 313.0622.

**2t:** N-((2,3-dihydrothieno[3,4-b][1,4]dioxin-5-yl)methyl)nicotinamide

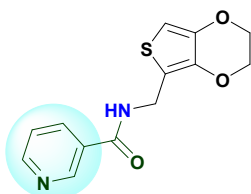

**<sup>1</sup>H NMR (300 MHz, CDCl<sub>3</sub>)**  $\delta$  9.02 (ddd,  $J$  = 16.1, 2.3, 0.9 Hz, 1H), 8.76 (ddd,  $J$  = 12.2, 4.9, 1.7 Hz, 1H), 8.20 – 8.12 (m, 1H), 7.45 – 7.38 (m, 1H), 6.59 (d,  $J$  = 4.9 Hz, 1H), 6.29 (s, 1H), 4.68 (d,  $J$  = 5.4 Hz, 2H), 4.28 – 4.20 (m, 4H). **<sup>13</sup>C NMR (75 MHz, CDCl<sub>3</sub>)**  $\delta$  152.29, 147.83, 135.32, 123.57, 98.30, 77.45, 77.03, 76.61, 64.82, 64.60, 35.44.

**HRMS (ESI-TOF):**  $m/z$  calcd. for C<sub>13</sub>H<sub>12</sub>N<sub>2</sub>O<sub>3</sub>S+H<sup>+</sup> ([M+H<sup>+</sup>]) 277.0647, found 277.0654.

**2u:** N-benzylpyrazine-2-carboxamide<sup>[21]</sup>

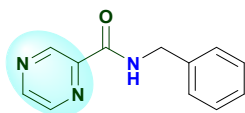

**<sup>1</sup>H NMR (300 MHz, DMSO)**  $\delta$  9.49 (s, 1H), 9.21 (dd,  $J$  = 1.5, 0.3 Hz, 1H), 8.88 (dd,  $J$  = 2.5, 0.3 Hz, 1H), 8.75 (dd,  $J$  = 2.5, 1.5 Hz, 1H), 7.35 – 7.21 (m, 5H), 4.52 (d,  $J$  = 6.4 Hz, 2H). **<sup>13</sup>C NMR (75 MHz, DMSO)**  $\delta$  148.02, 144.07, 139.71, 128.75, 127.84, 127.30, 42.85, 40.83, 40.55, 40.27, 40.00, 39.72, 39.44, 39.16.

**2v:** N-benzyl-4-cyanobenzamide<sup>[22]</sup>

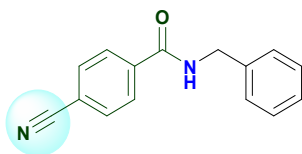

**<sup>1</sup>H NMR (300 MHz, DMSO)**  $\delta$  9.30 (t,  $J$  = 6.0 Hz, 1H), 8.08 – 8.02 (m, 2H), 8.01 – 7.94 (m, 2H), 7.35 – 7.25 (m, 5H), 4.50 (dd,  $J$  = 5.8, 2.1 Hz, 2H). **<sup>13</sup>C NMR (75 MHz, DMSO)**  $\delta$  165.32, 139.66, 138.77, 132.95, 128.81, 128.59, 127.74, 127.34, 118.82, 114.12, 43.27, 40.83, 40.55, 40.27, 39.99, 39.72, 39.44, 39.16.

**2w:** N-benzylquinoline-3-carboxamide<sup>[23]</sup>

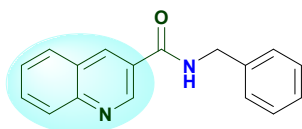

**<sup>1</sup>H NMR (300 MHz, CDCl<sub>3</sub>)**  $\delta$  8.76 (dd,  $J$  = 4.3, 1.7 Hz, 1H), 8.19 – 8.13 (m, 1H), 7.98 – 7.85 (m, 3H), 7.41 (d,  $J$  = 5.5 Hz, 1H), 7.28 – 7.09 (m, 6H), 4.52 (d,  $J$  = 5.7 Hz, 2H). **<sup>13</sup>C NMR (75 MHz, CDCl<sub>3</sub>)**  $\delta$  167.01, 151.84, 149.18, 138.19, 136.98, 132.35, 129.71, 128.71, 127.81, 127.54, 127.48, 127.35, 121.82, 77.58, 44.19.

## 7. NMR spectra

210504.315.11.fid  
Jie Gao, 170-1-35  
Au1H CDCl<sub>3</sub> {C:\Bruker\TopSpin3.6.2} 2105 15

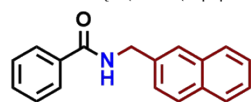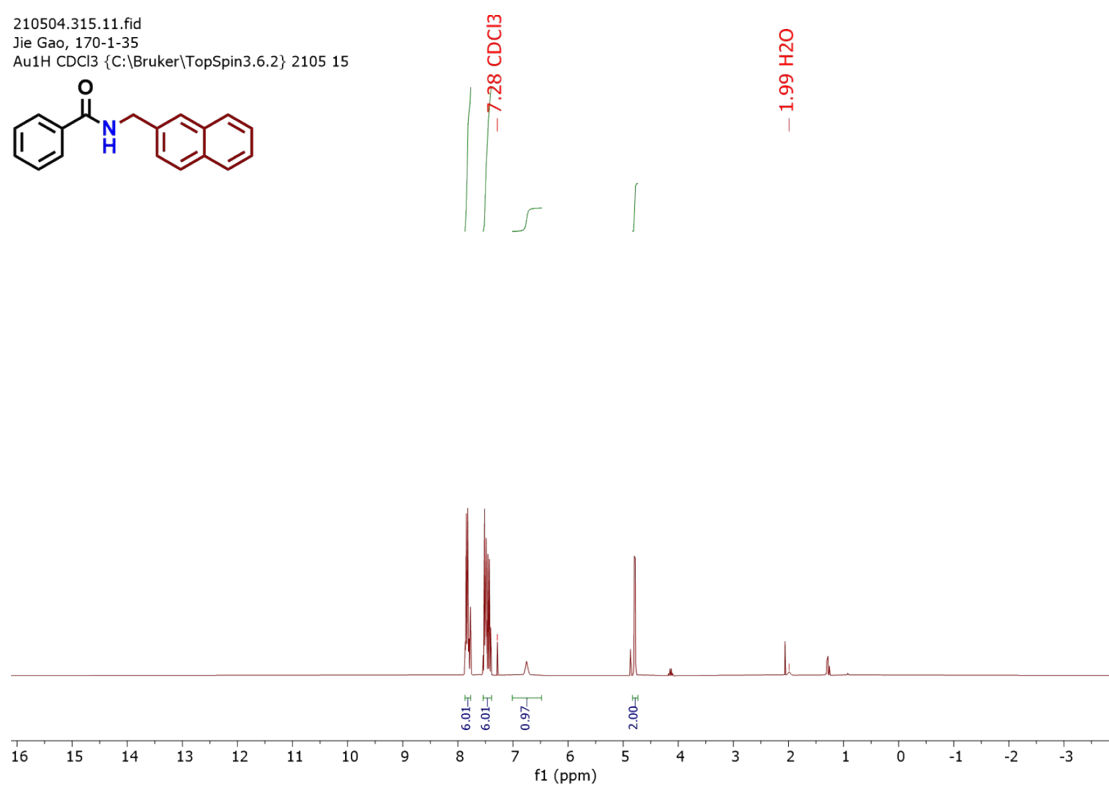

210504.315.10.fid  
Jie Gao, 170-1-35  
Au13C CDCl<sub>3</sub> {C:\Bruker\TopSpin3.6.2} 2105 15

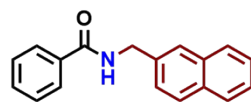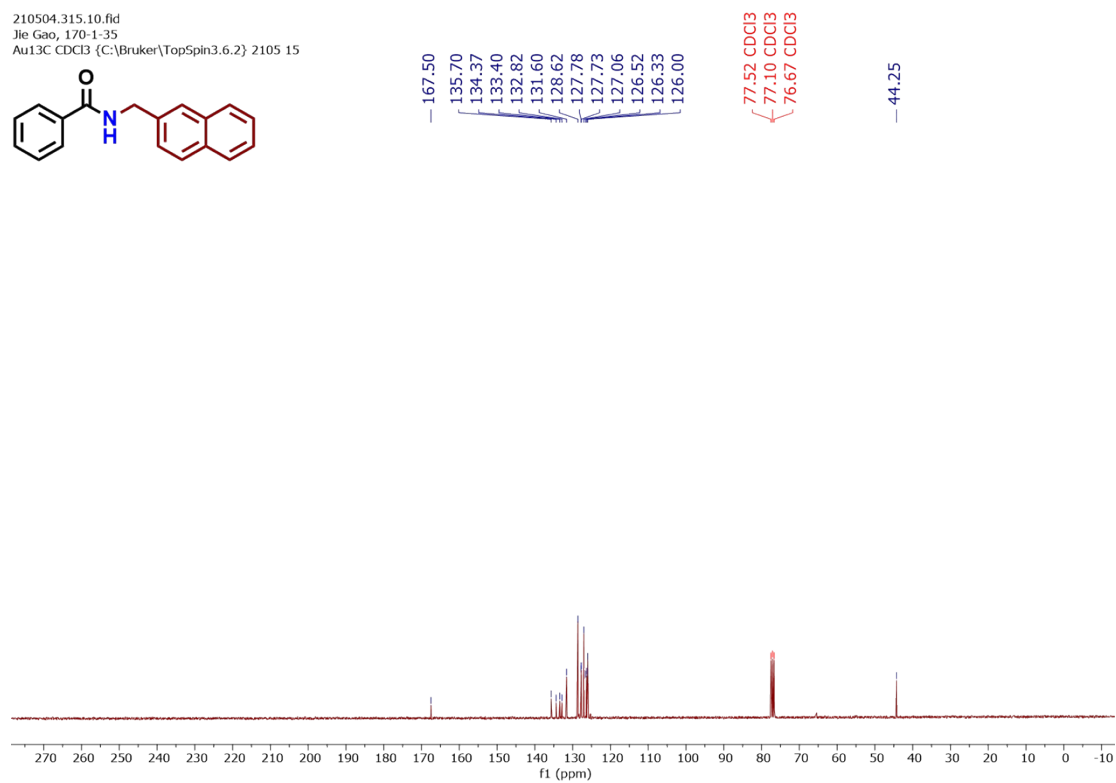

220302.f355.10.fid  
 Rui Ma 47-2-11  
 PROTON DMSO {C:\Bruker\TopSpin3.6.2} 2203 55

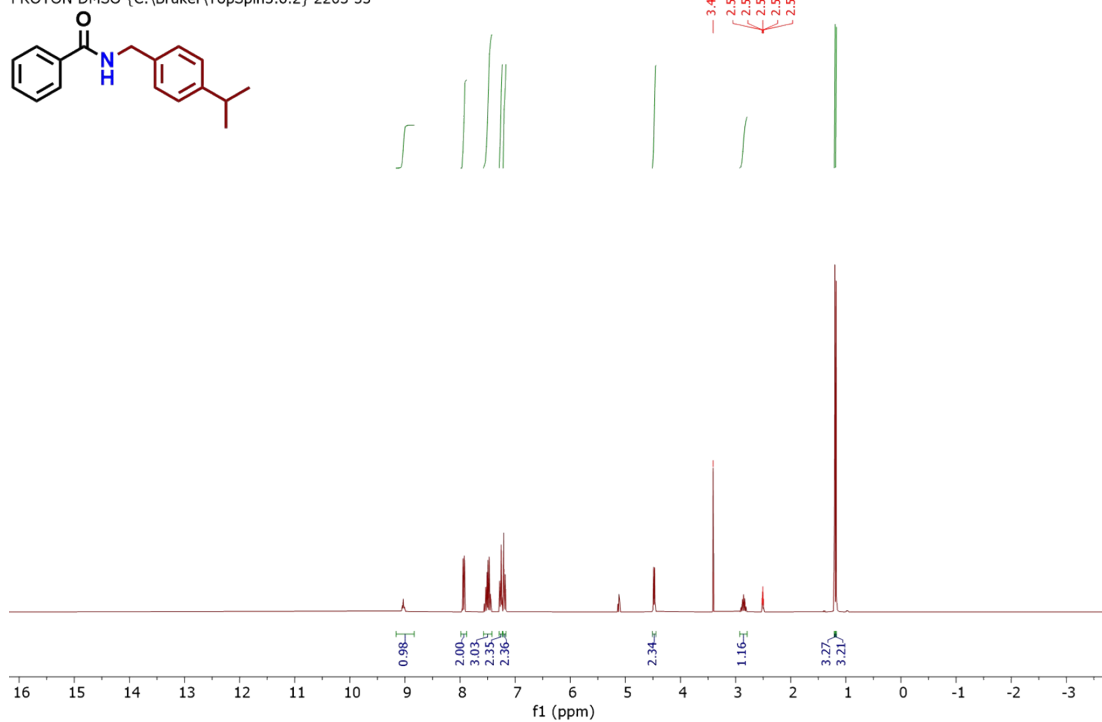

220302.f355.11.fid  
 Rui Ma 47-2-11  
 C13CPD DMSO {C:\Bruker\TopSpin3.6.2} 2203 55

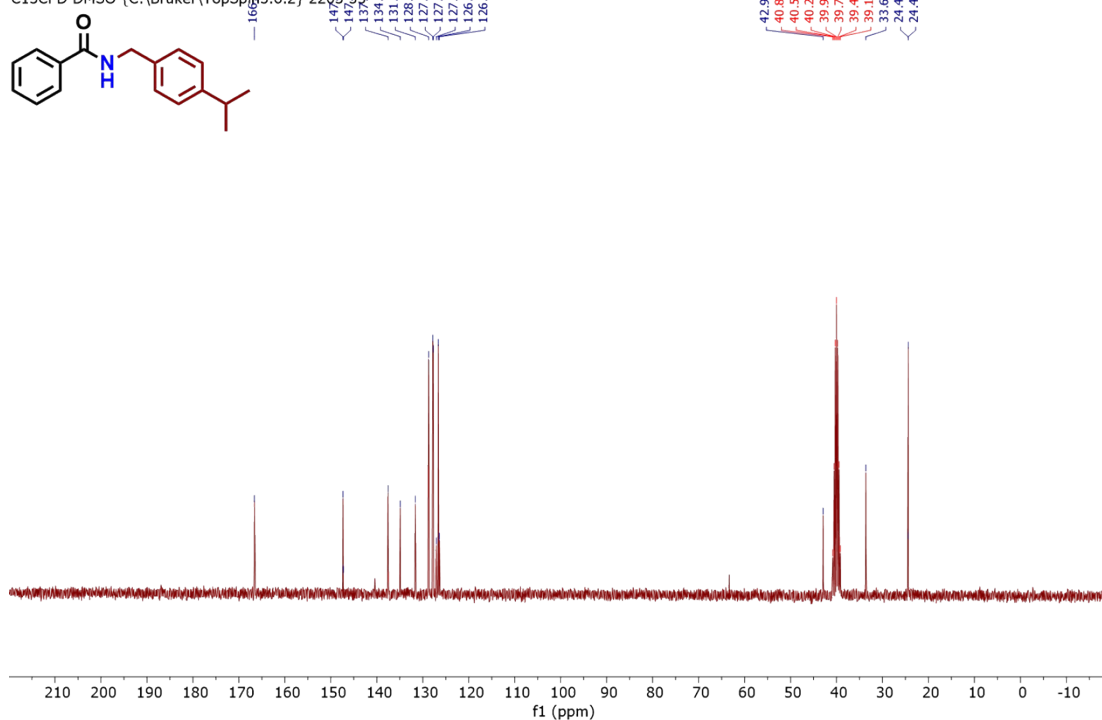

COc1ccc(cc1)CN(C(=O)c2ccccc2)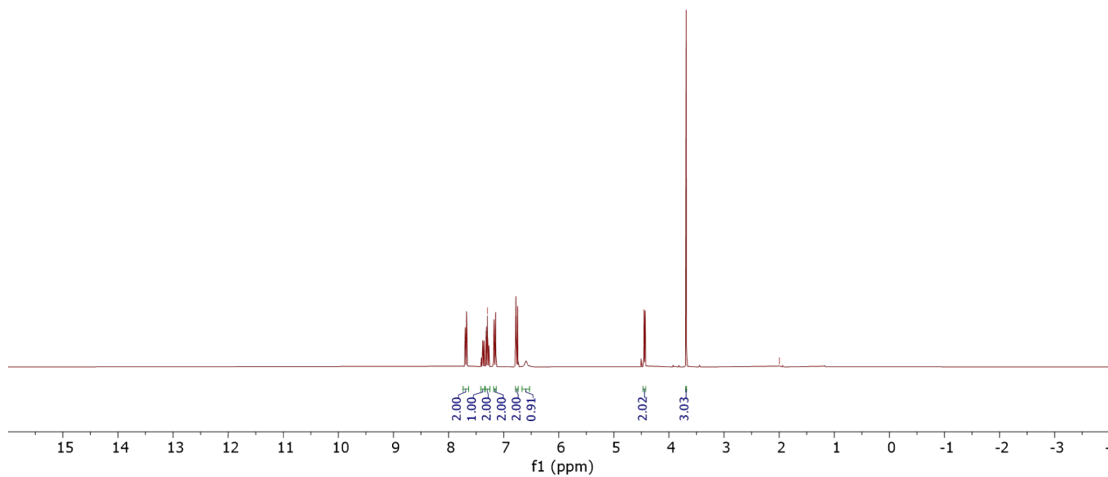COc1ccc(cc1)CN(C(=O)c2ccccc2)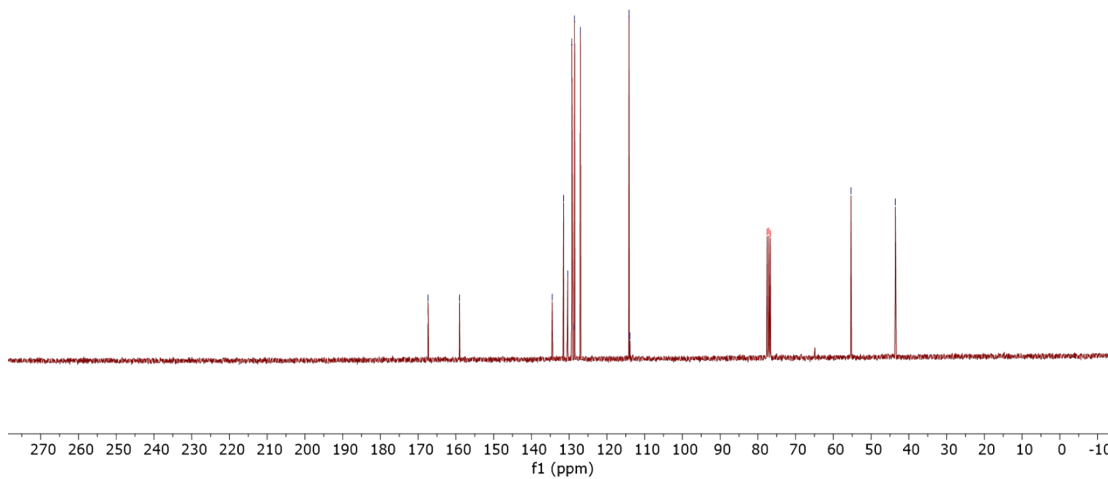

210506.362.12.fid  
Jie Gao 170-1-59  
Au1H DMSO {C:\Bruker\TopSpin3.6.2} 2105 2

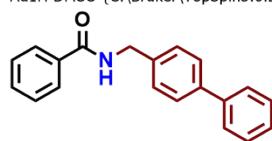

3.39 H<sub>2</sub>O  
2.52 DMSO  
2.51 DMSO  
2.51 DMSO  
2.50 DMSO  
2.49 DMSO

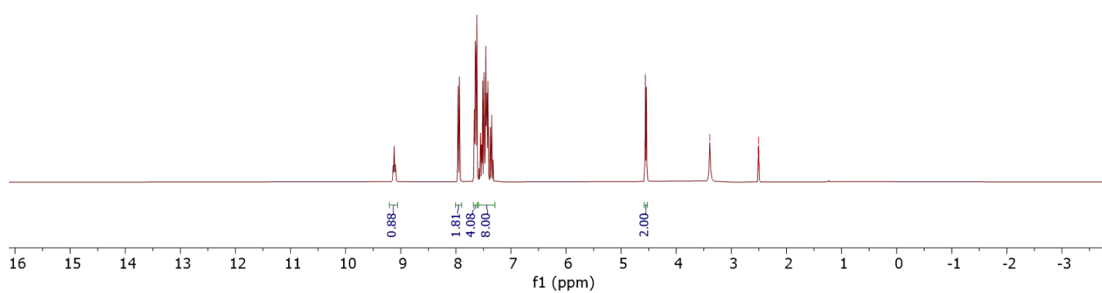

210506.362.13.fid  
Jie Gao 170-1-59  
Au13C DMSO {C:\Bruker\TopSpin3.6.2} 2105 2

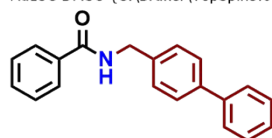

166.71  
140.48  
139.44  
139.19  
139.03  
134.80  
131.74  
129.38  
128.81  
128.33  
127.78  
127.74  
127.51  
127.10  
127.05  
127.02  
126.86

42.85  
40.82 DMSO  
40.54 DMSO  
40.26 DMSO  
39.98 DMSO  
39.70 DMSO  
39.43 DMSO  
39.15 DMSO

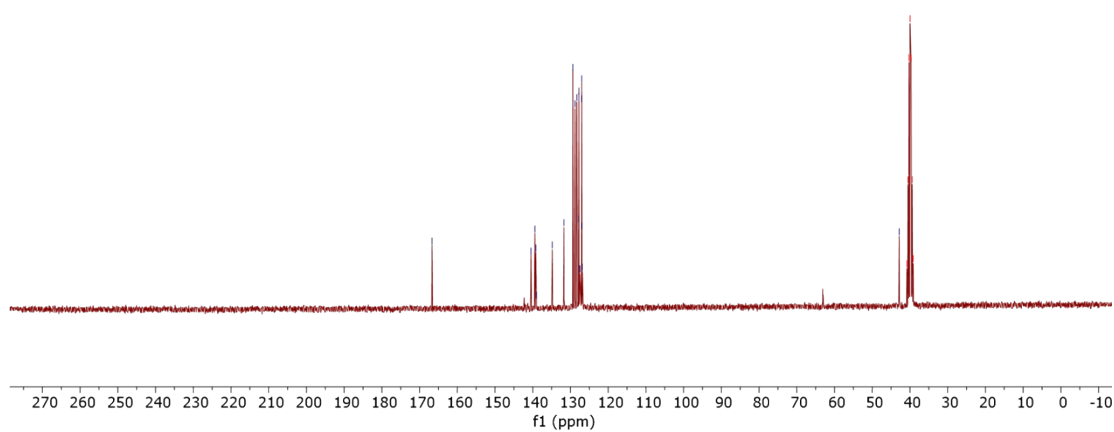

210507.315.10.fid  
Jie Gao 170-1-58  
Au1H CDCl<sub>3</sub> {C:\Bruker\TopSpin3.6.2} 2105 15

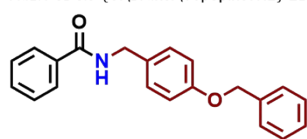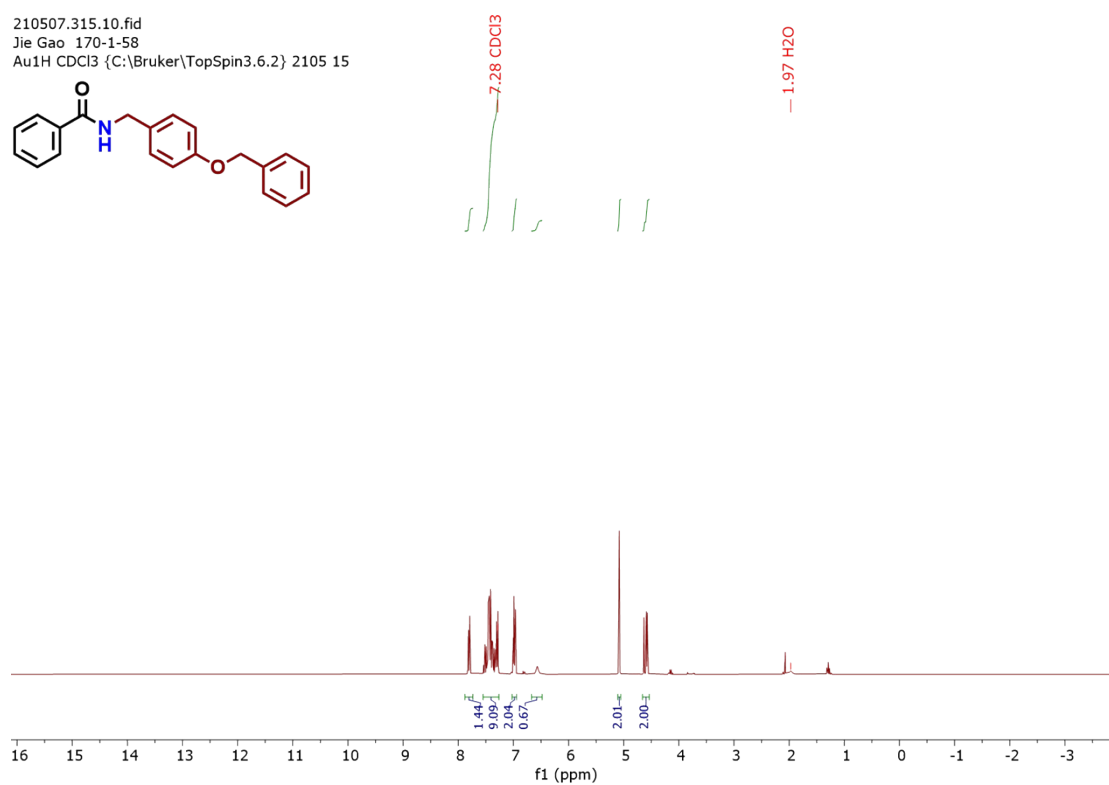

210507.315.11.fid  
Jie Gao 170-1-58  
Au13C CDCl<sub>3</sub> {C:\Bruker\TopSpin3.6.2}

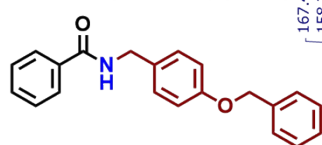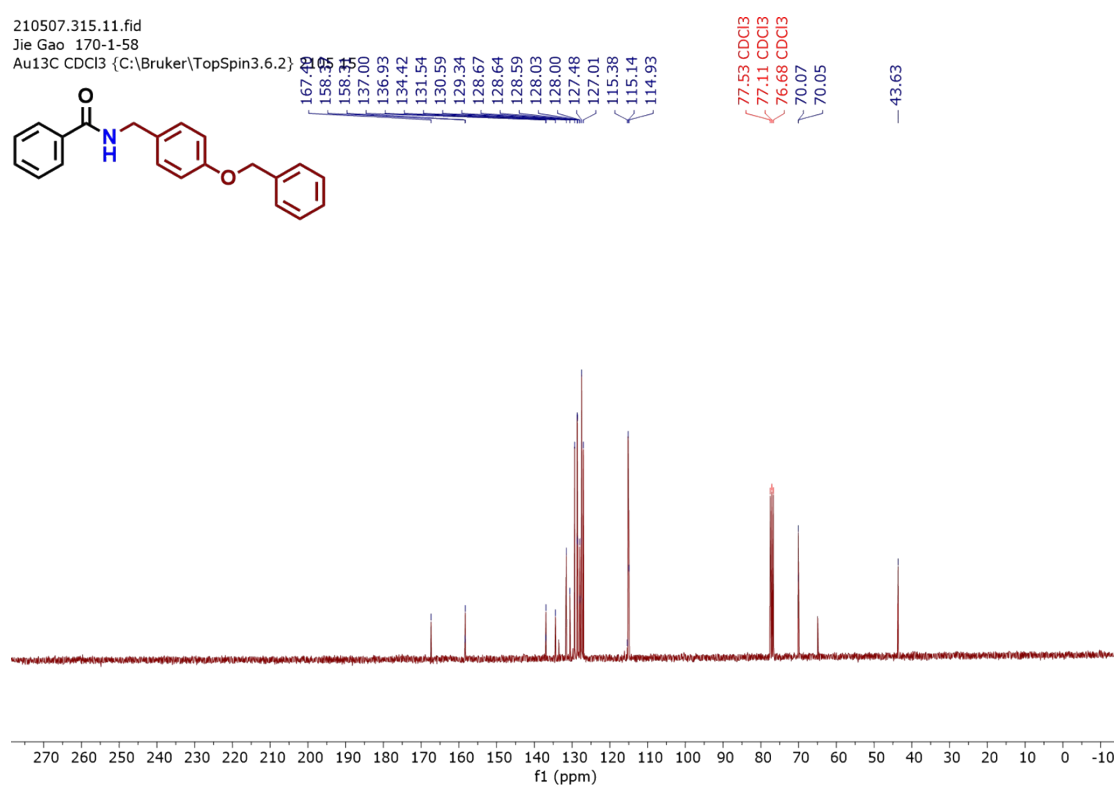

220302.f354.10.fid  
 Rui Ma 47-2-3  
 PROTON DMSO {C:\Bruker\TopSpin3.6.2} 2203 54

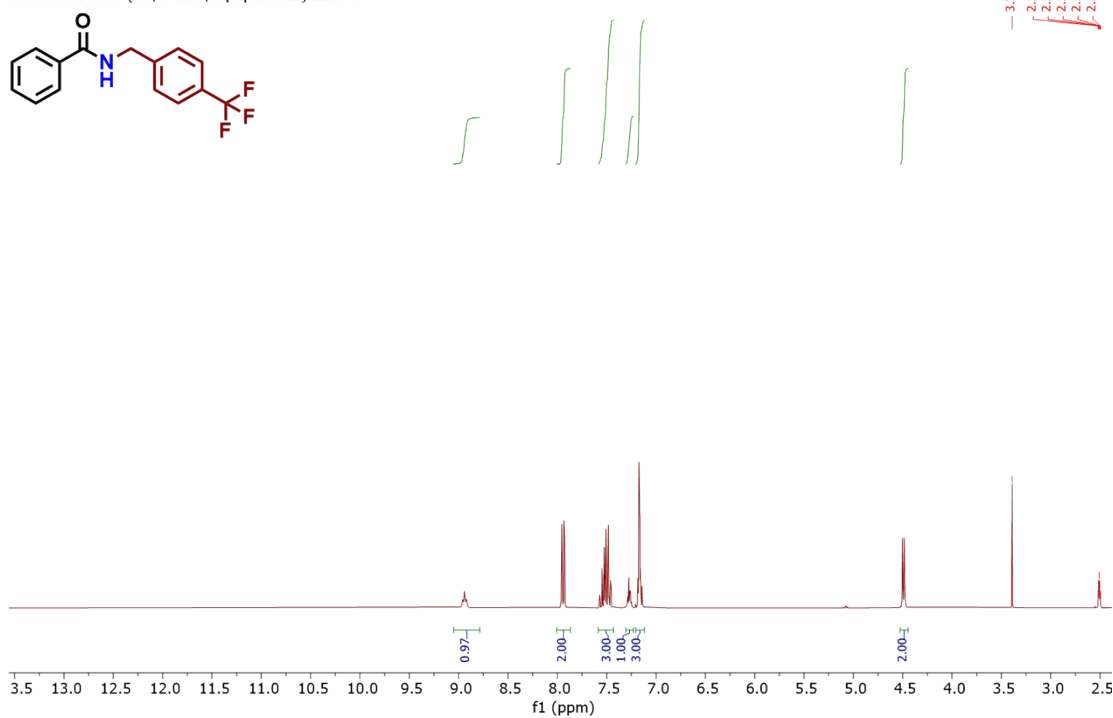

220302.f354.11.fid  
 Rui Ma 47-2-3  
 C13CPD DMSO {C:\Bruker\TopSpin3.6.2} 2203 54

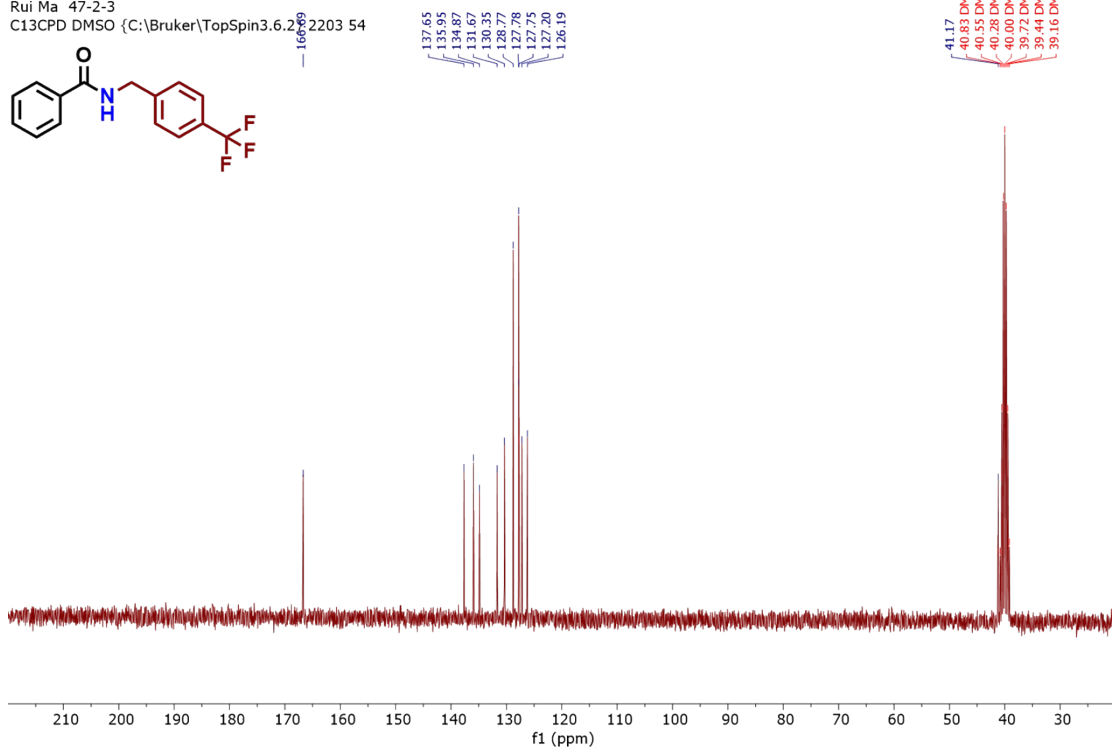

210429.457.10.fid  
Jie Gao 170-1-3a  
Au1H CDCl<sub>3</sub> {C:\Bruker\TopSpin3.5\pl6} 2104 57

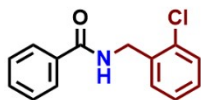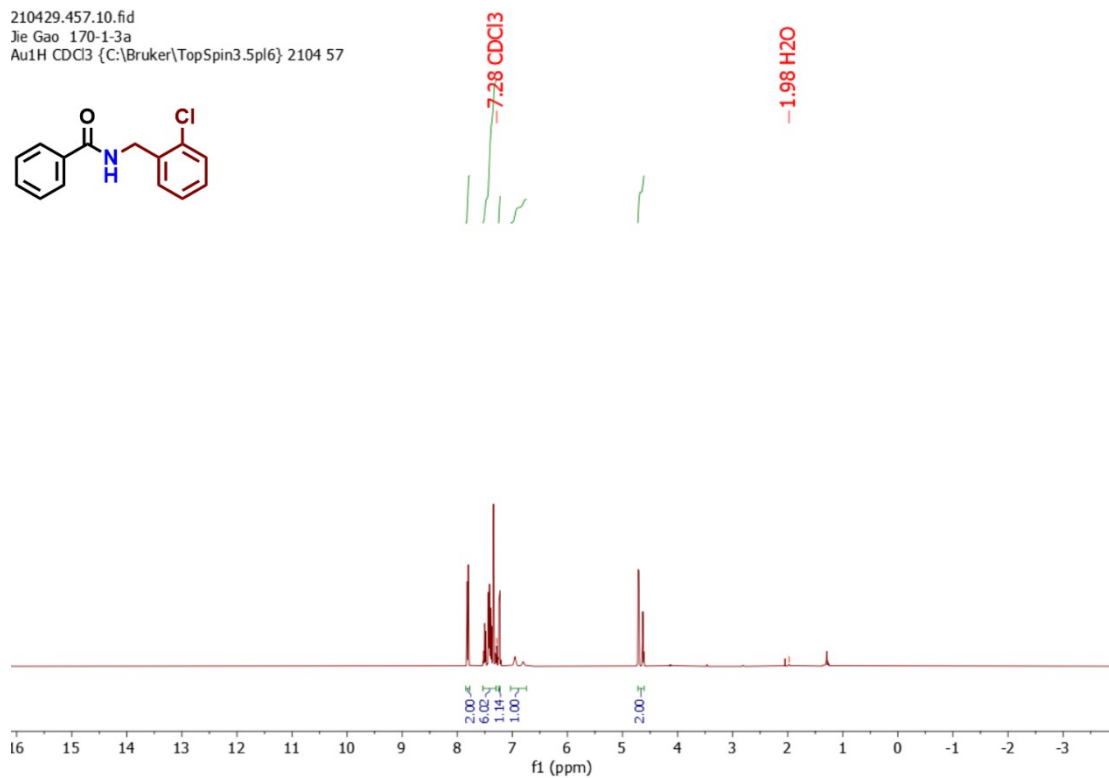

210429.457.11.fid  
Jie Gao 170-1-3a  
Au13C CDCl<sub>3</sub> {C:\Bruker\TopSpin3.5\pl6} 2104 57

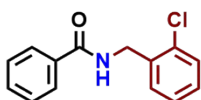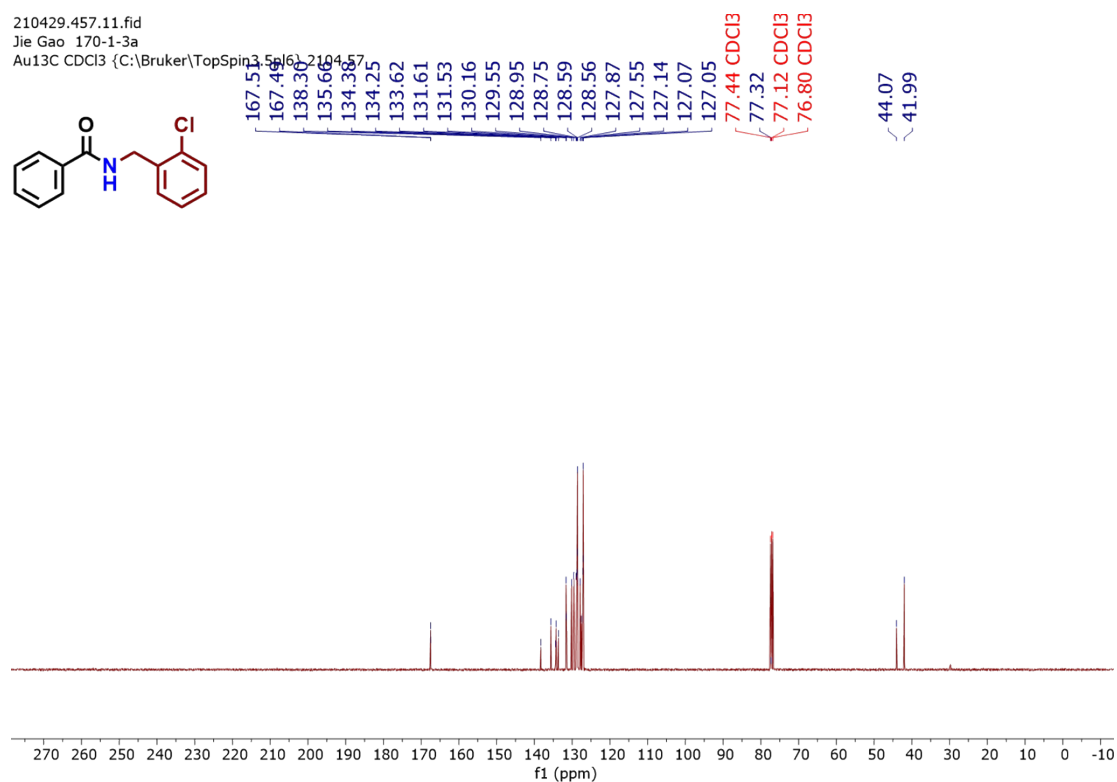

210505.335.10.fid  
Jie Gao 170-1-22  
Au1H DMSO {C:\Bruker\TopSpin3.6.2} 2105 35

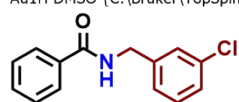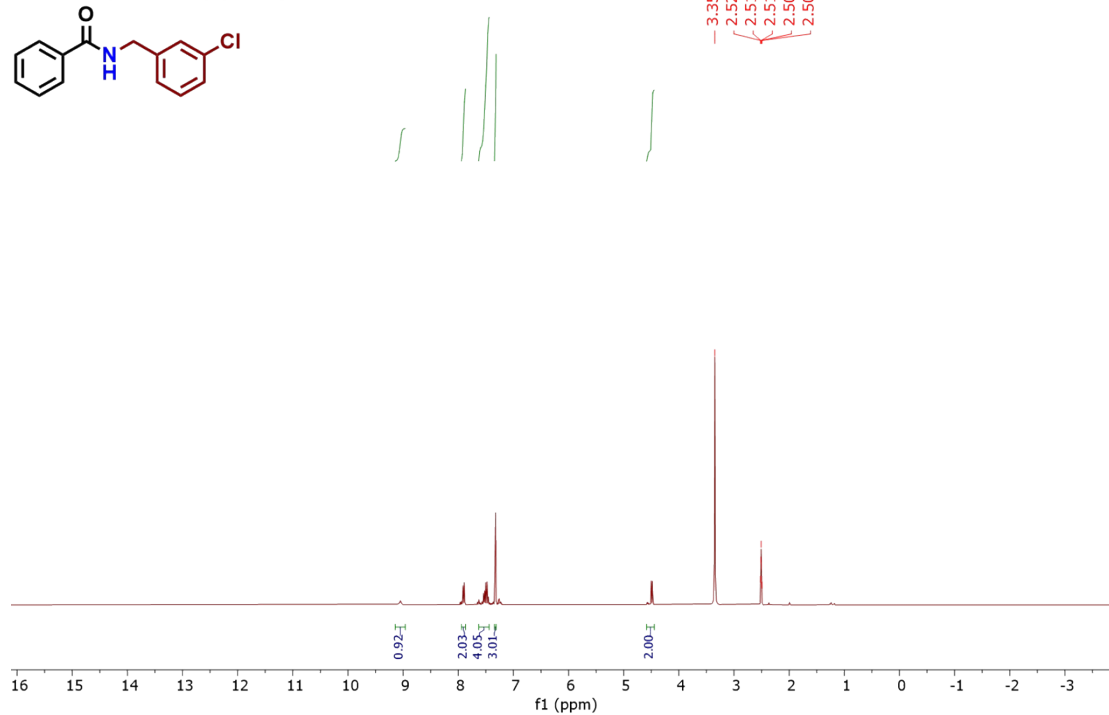

210505.335.11.fid  
Jie Gao 170-1-22  
Au13C DMSO {C:\Bruker\TopSpin3.6.2} 2105 35

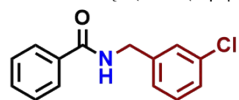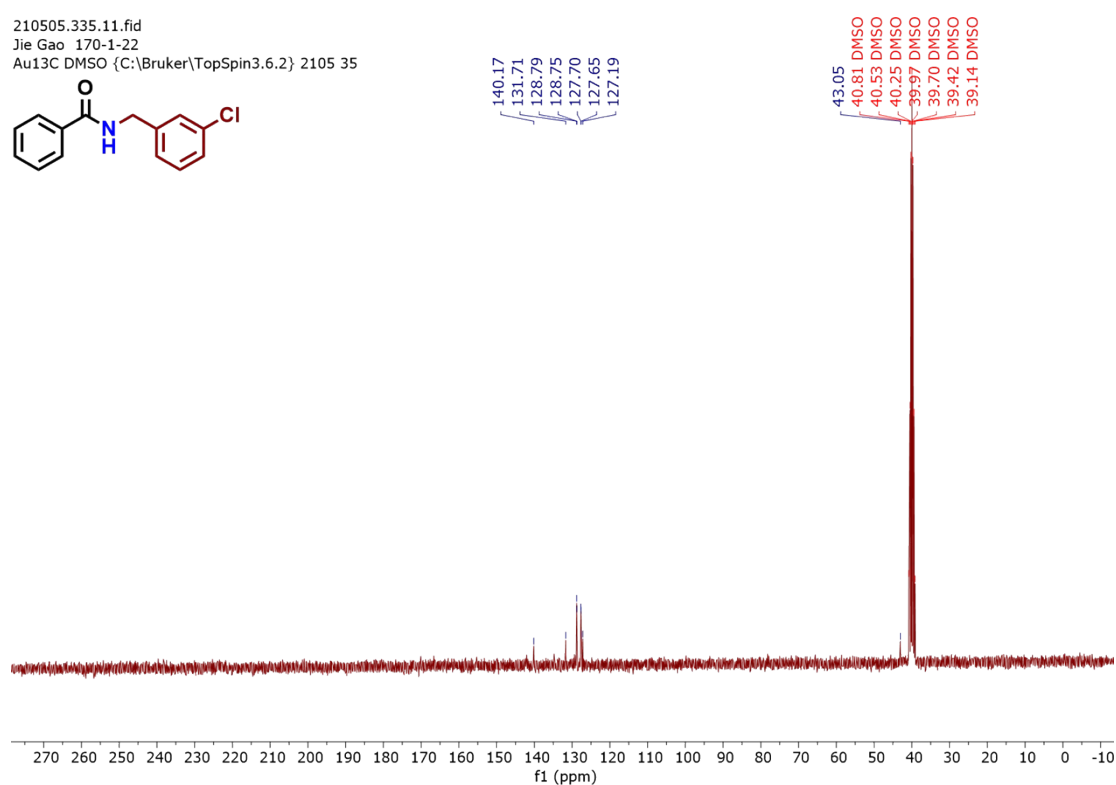

PROTON CDCl<sub>3</sub> {C:\Bruker\TopSpin3.6.2} 2205 24

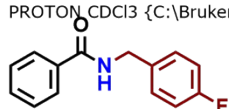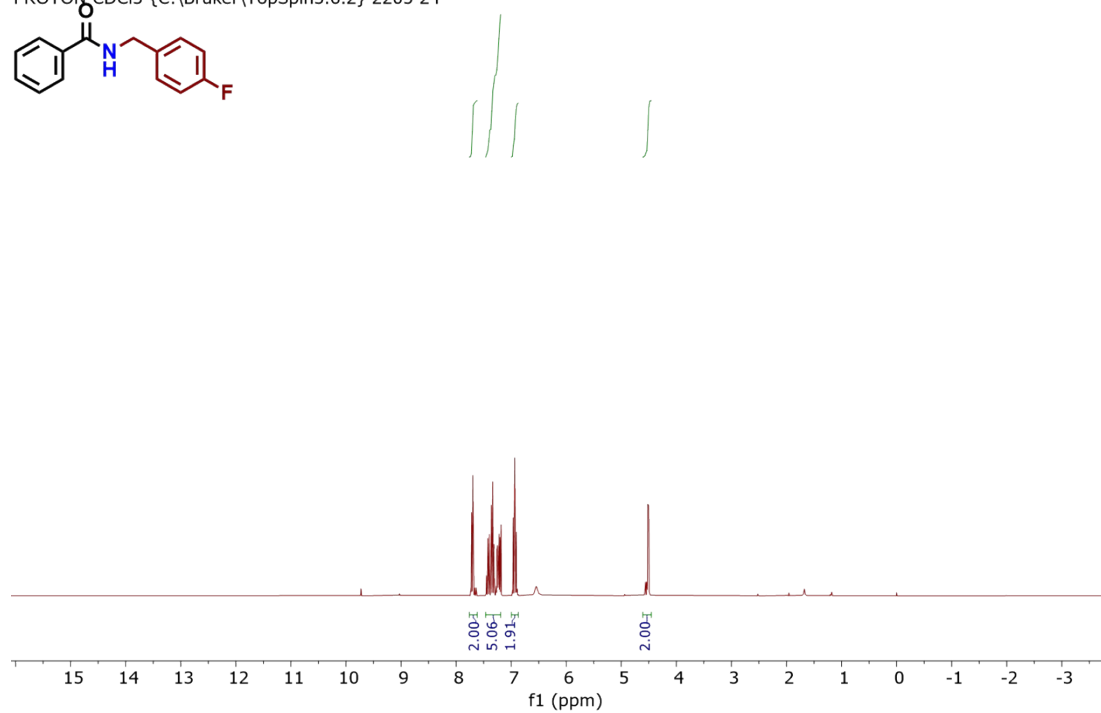

C13CPD CDCl<sub>3</sub> {C:\Bruker\TopSpin3.6.2} 2205 24

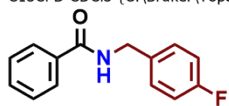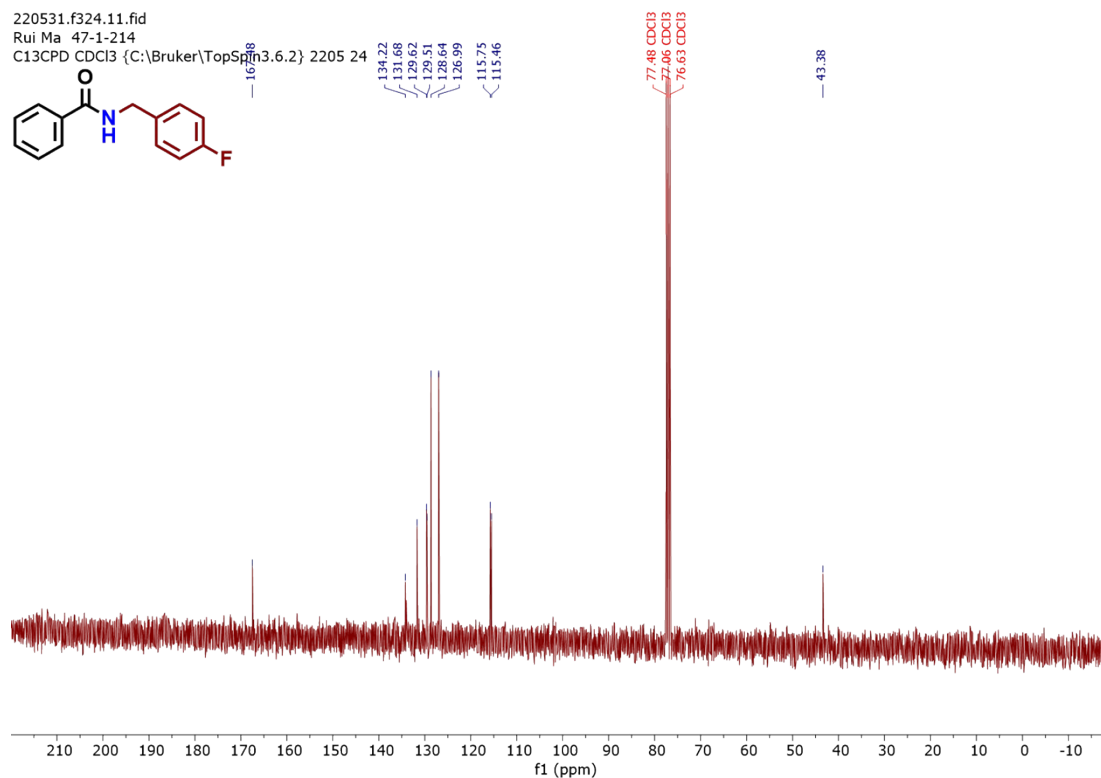

210505.331.10.fid  
Jie Gao 170-1-23c  
Au1H DMSO {C:\Bruker\TopSpin3.6.2} 2105 31

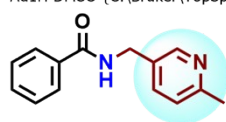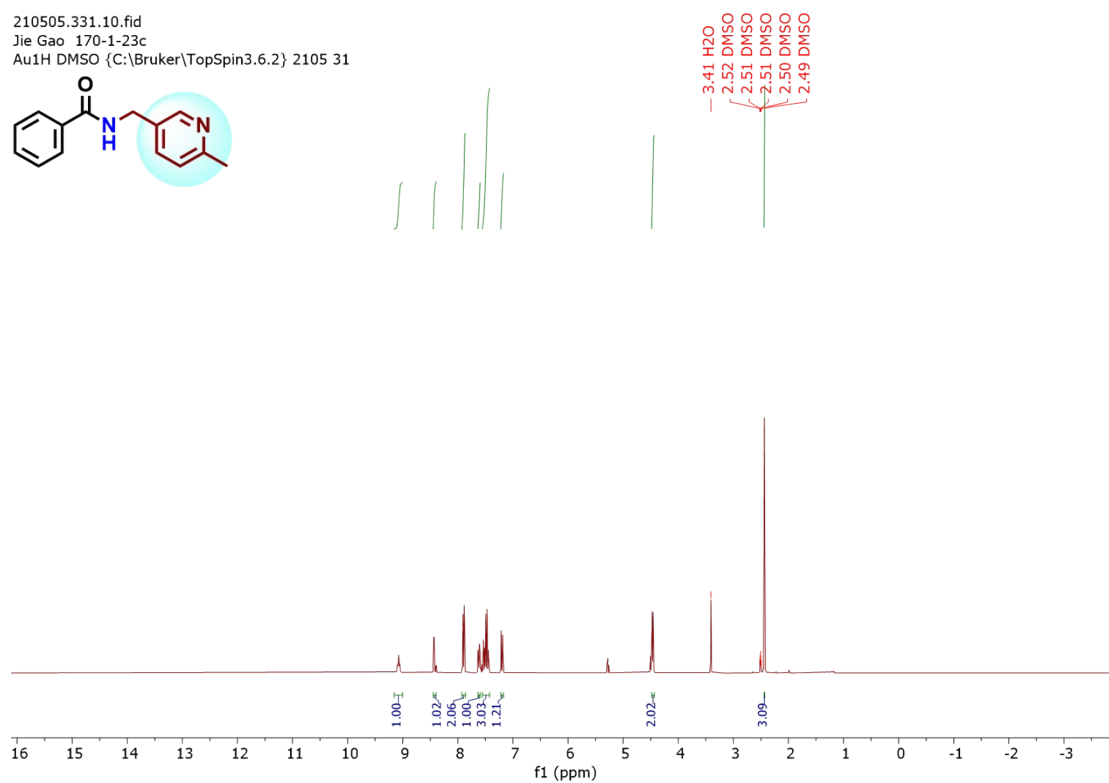

210505.331.11.fid  
Jie Gao 170-1-23c  
Au13C DMSO {C:\Bruker\TopSpin3.6.2} 2105 31

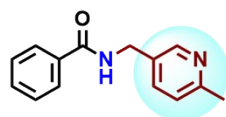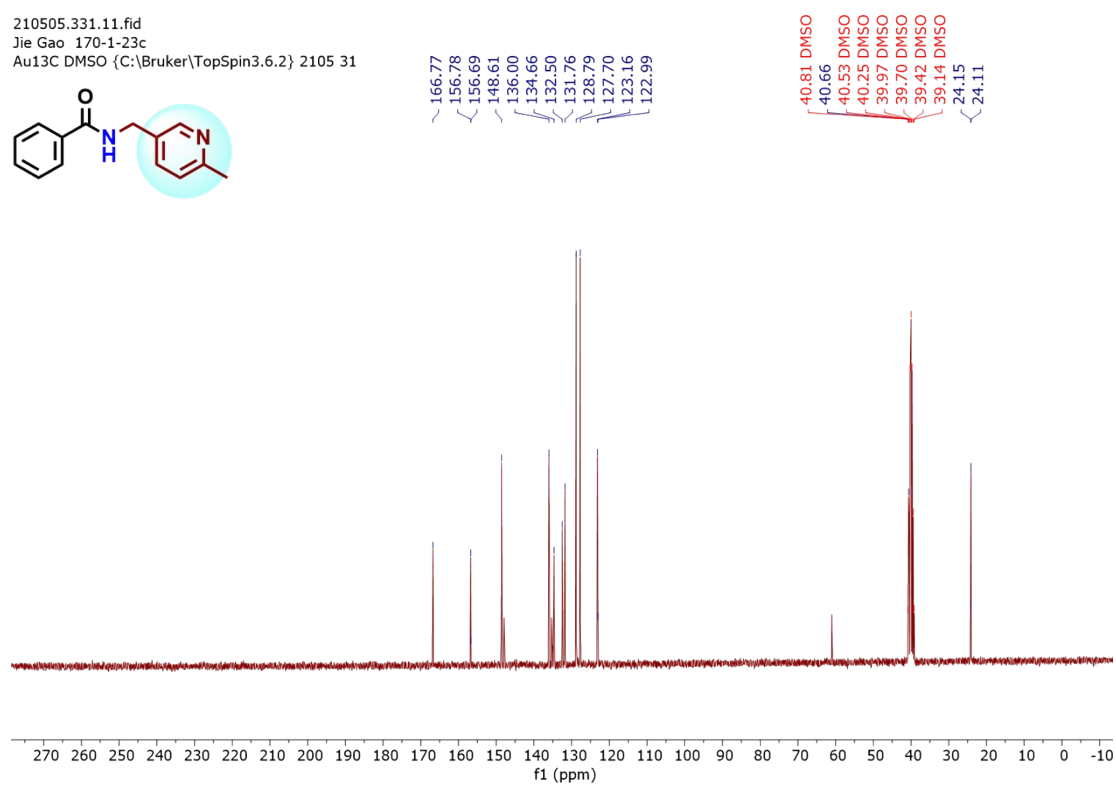

210505.334.10.fid  
Jie Gao 170-1-29  
Au1H DMSO {C:\Bruker\TopSpin3.6.2} 2105 34

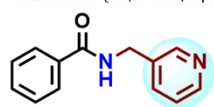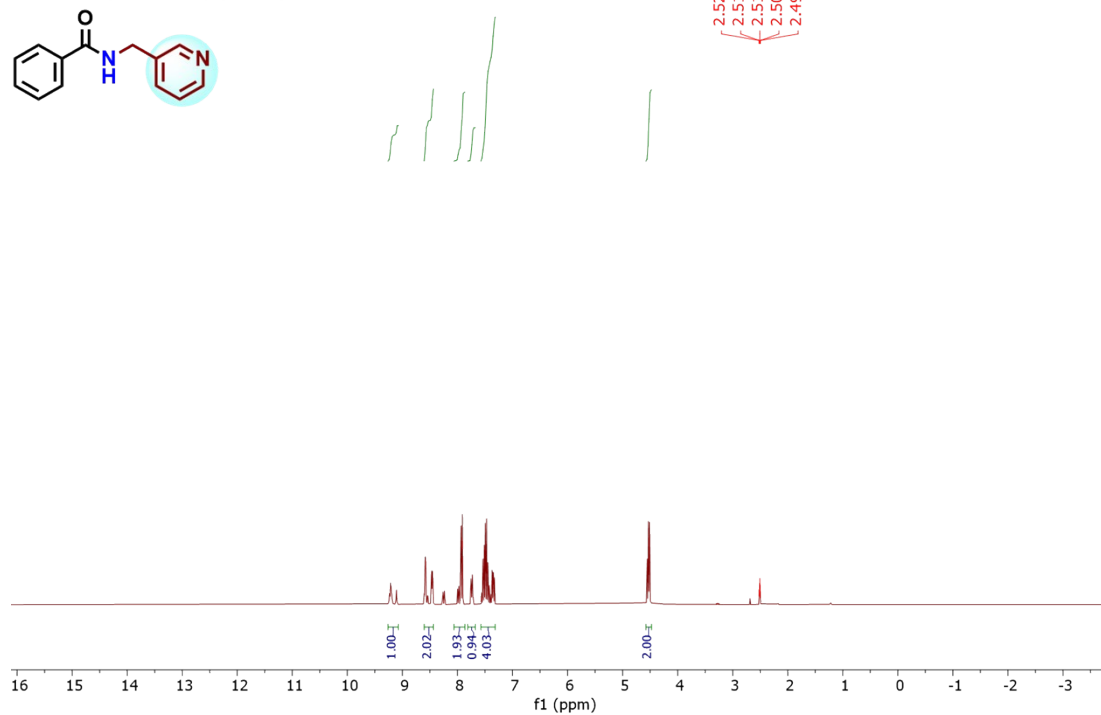

210505.334.11.fid  
Jie Gao 170-1-29  
Au13C DMSO {C:\Bruker\TopSpin3.6.2} 2105 34

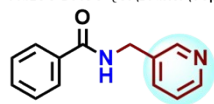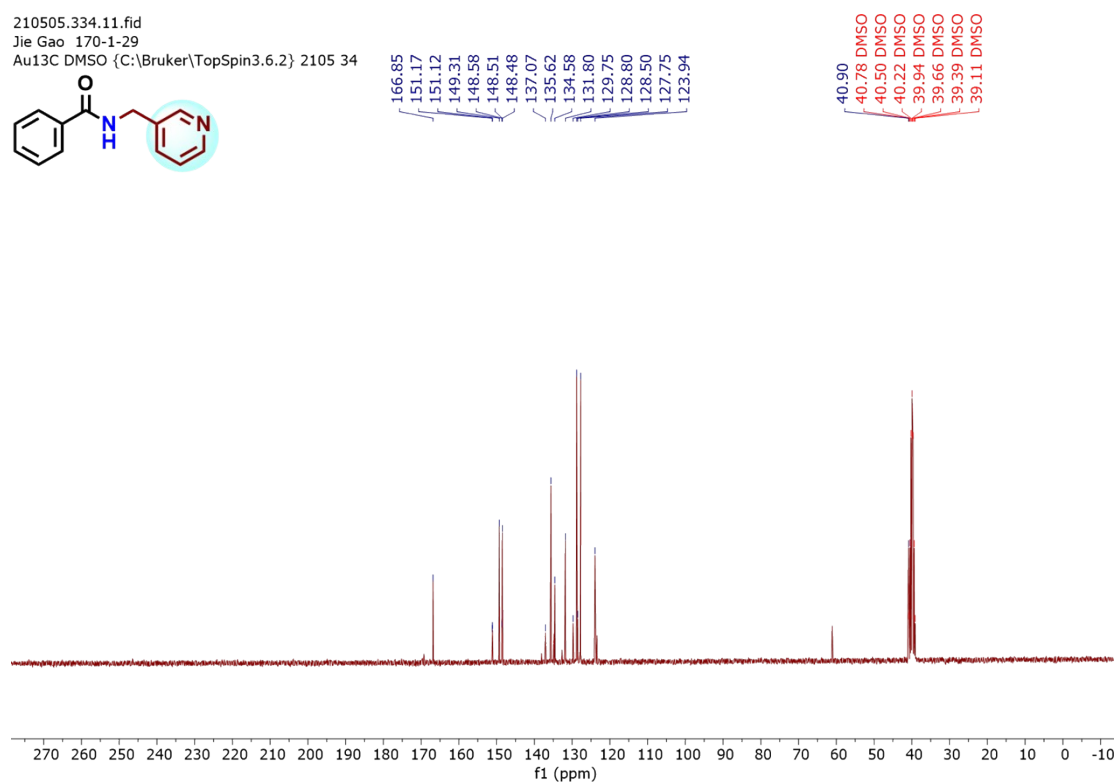

220304.328.10.fid  
 Rui Ma 47-2-14  
 Au1H CDCl<sub>3</sub> {C:\Bruker\TopSpin3.6.2} 2203 28

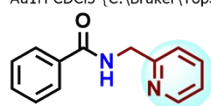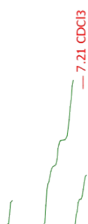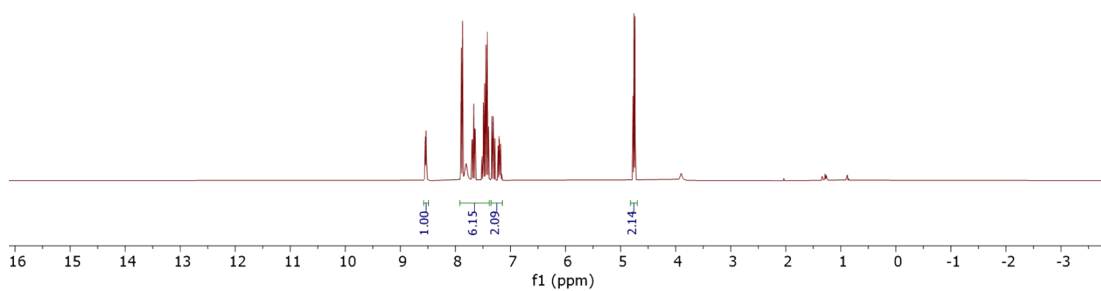

220304.328.11.fid  
 Rui Ma 47-2-14  
 Au13C CDCl<sub>3</sub> {C:\Bruker\TopSpin3.6.2} 2203 28

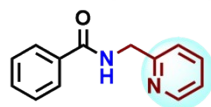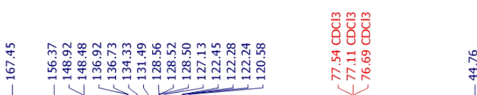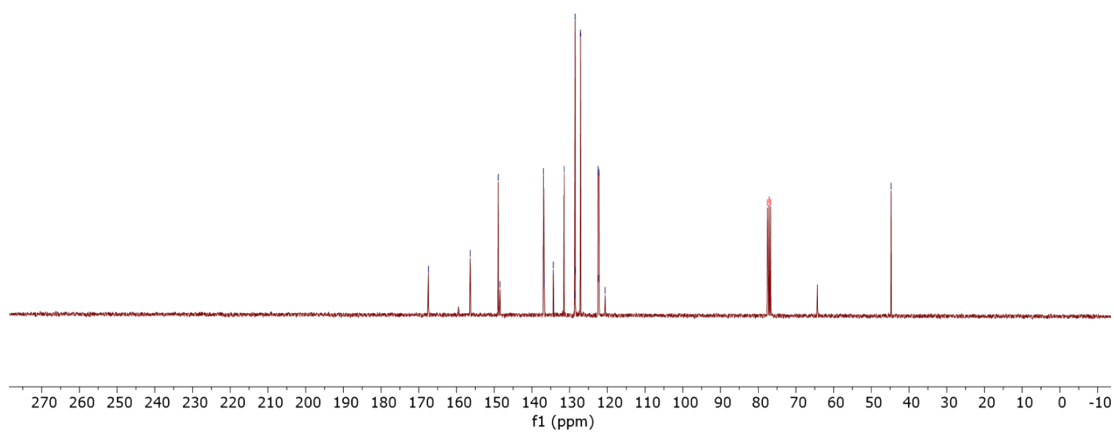

220304.322.10.fid  
 Rui Ma 47-2-13  
 Au1H DMSO {C:\Bruker\TopSpin3.6.2} 2203 22

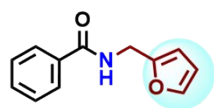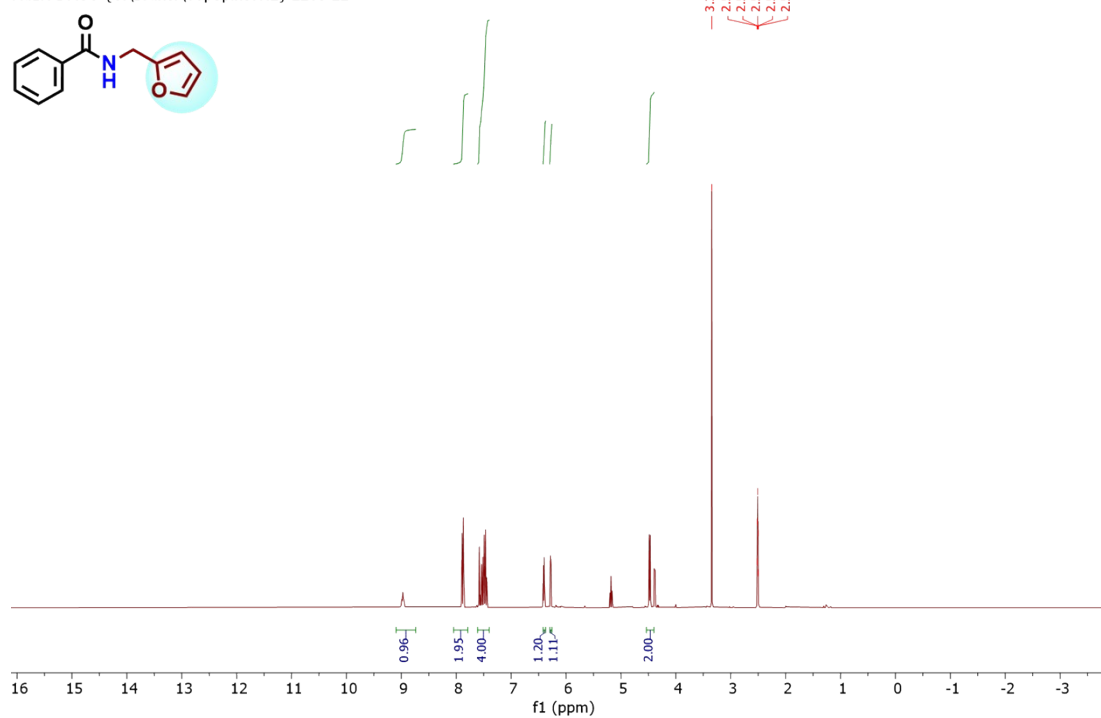

220304.322.11.fid  
 Rui Ma 47-2-13  
 Au13C DMSO {C:\Bruker\TopSpin3.6.2} 2203 22

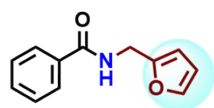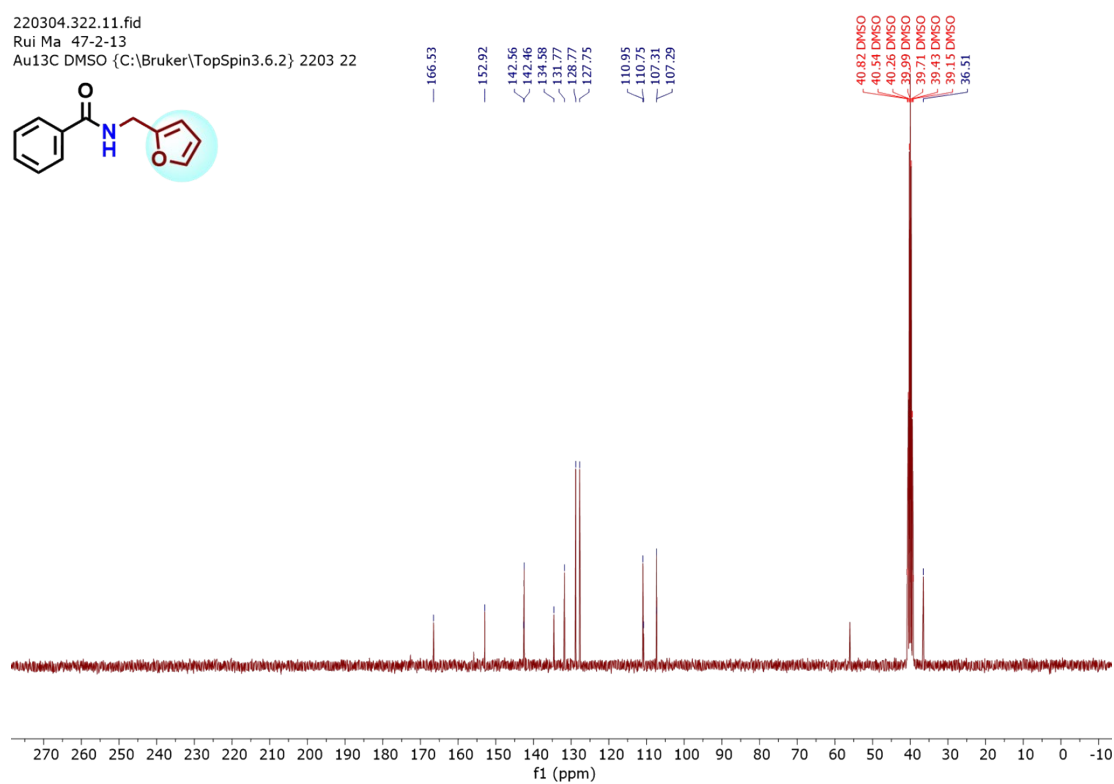

210507.304.10.fid  
Jie Gao 170-1-64  
Au1H CDCl<sub>3</sub> {C:\Bruker\TopSpin3.6.2} 2105 4

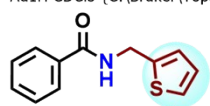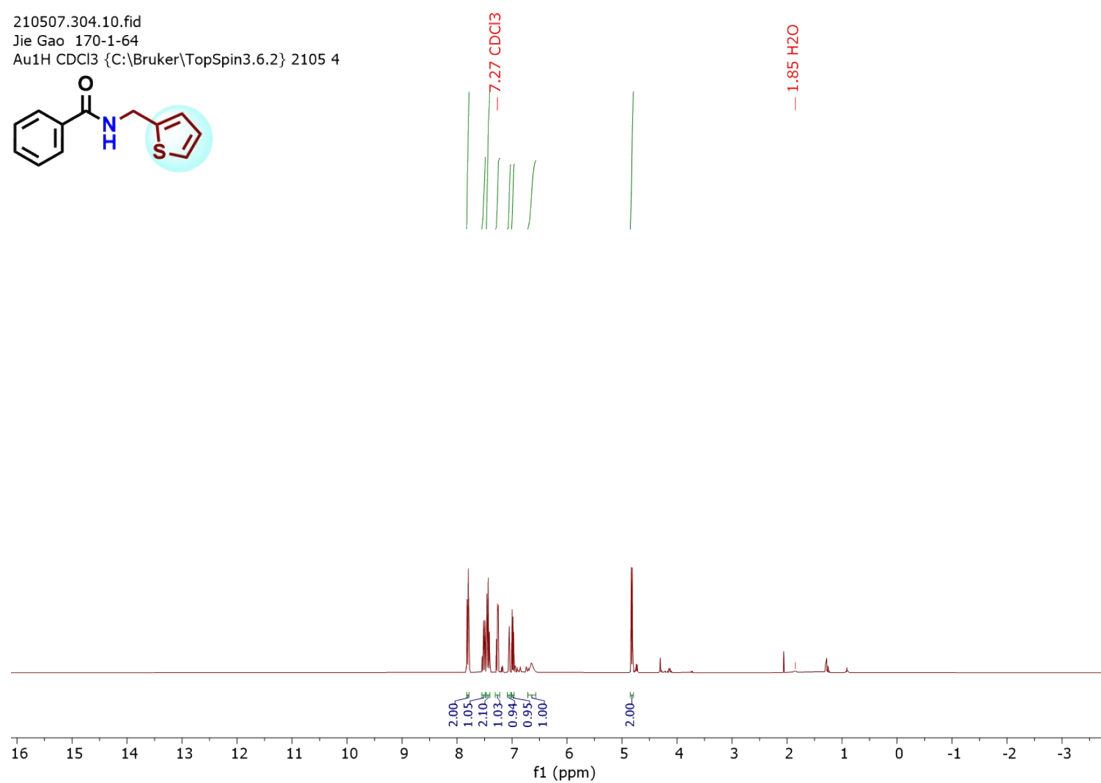

210507.304.11.fid  
Jie Gao 170-1-64  
Au13C CDCl<sub>3</sub> {C:\Bruker\TopSpin3.6.2} 2105 4

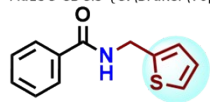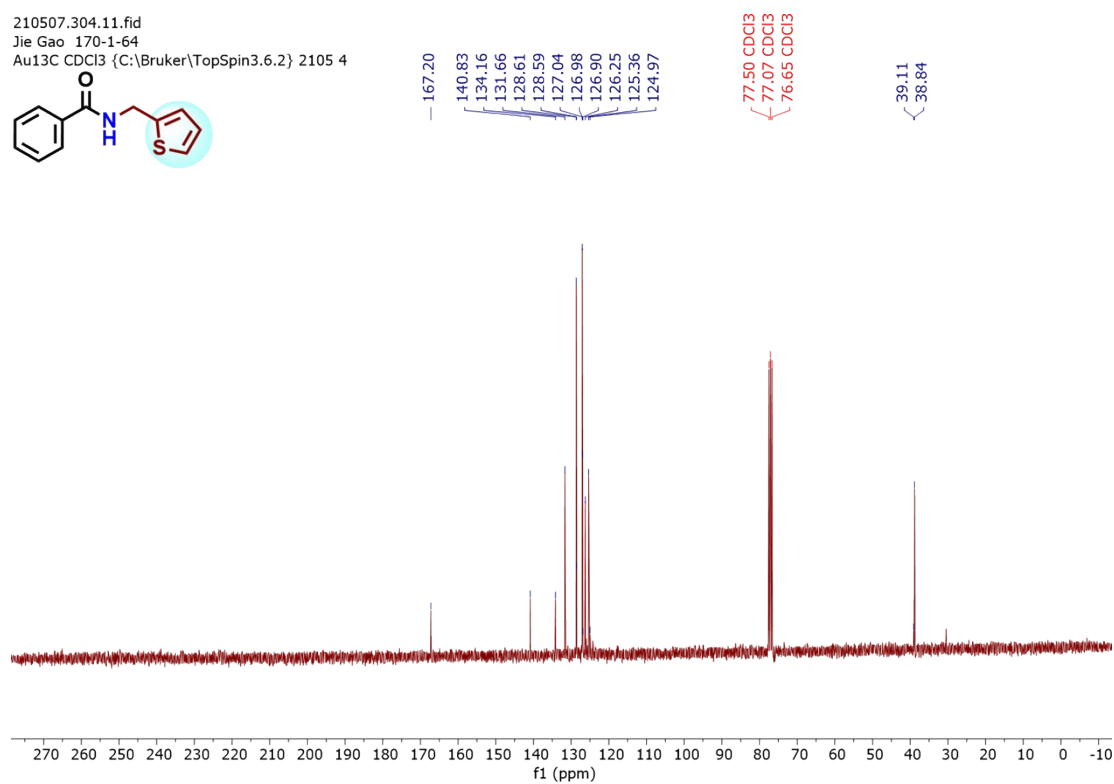

220531.f321.10.fid  
 Rui Ma 47-1-216b  
 PROTON DMSO {C:\Bruker\TopSpin3.6.2} 2205 21

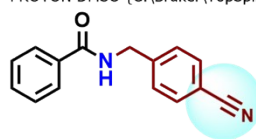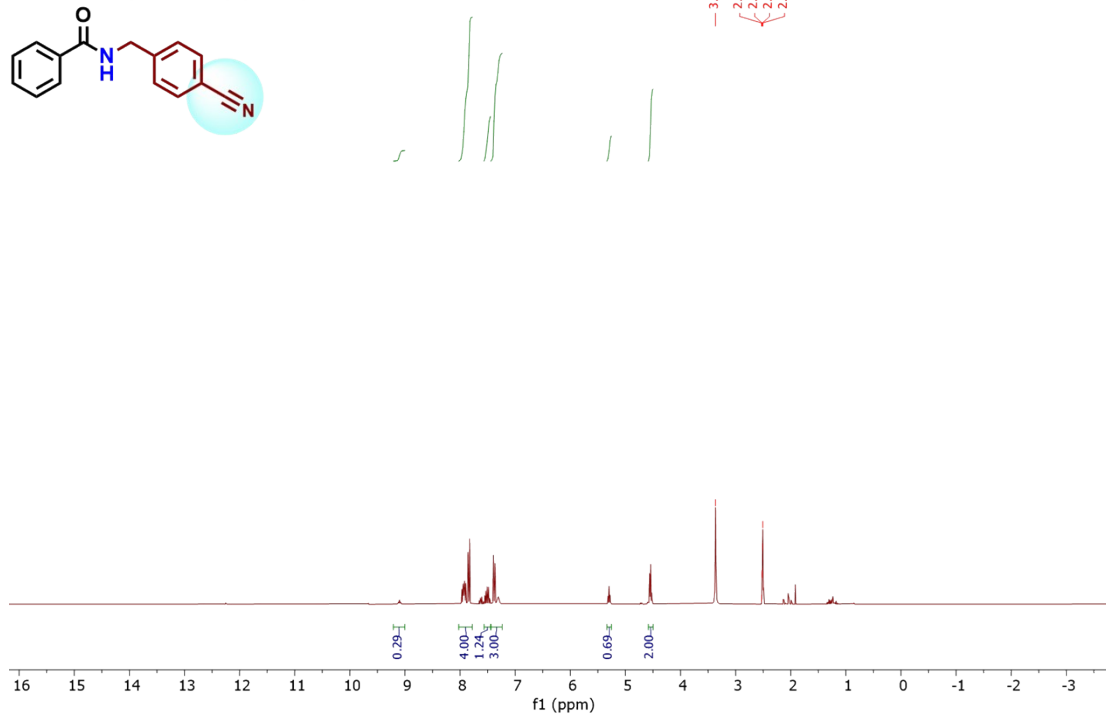

220531.f321.11.fid  
 Rui Ma 47-1-216b  
 C13CPD DMSO {C:\Bruker\TopSpin3.6.2}

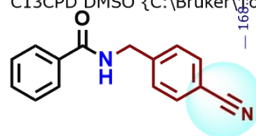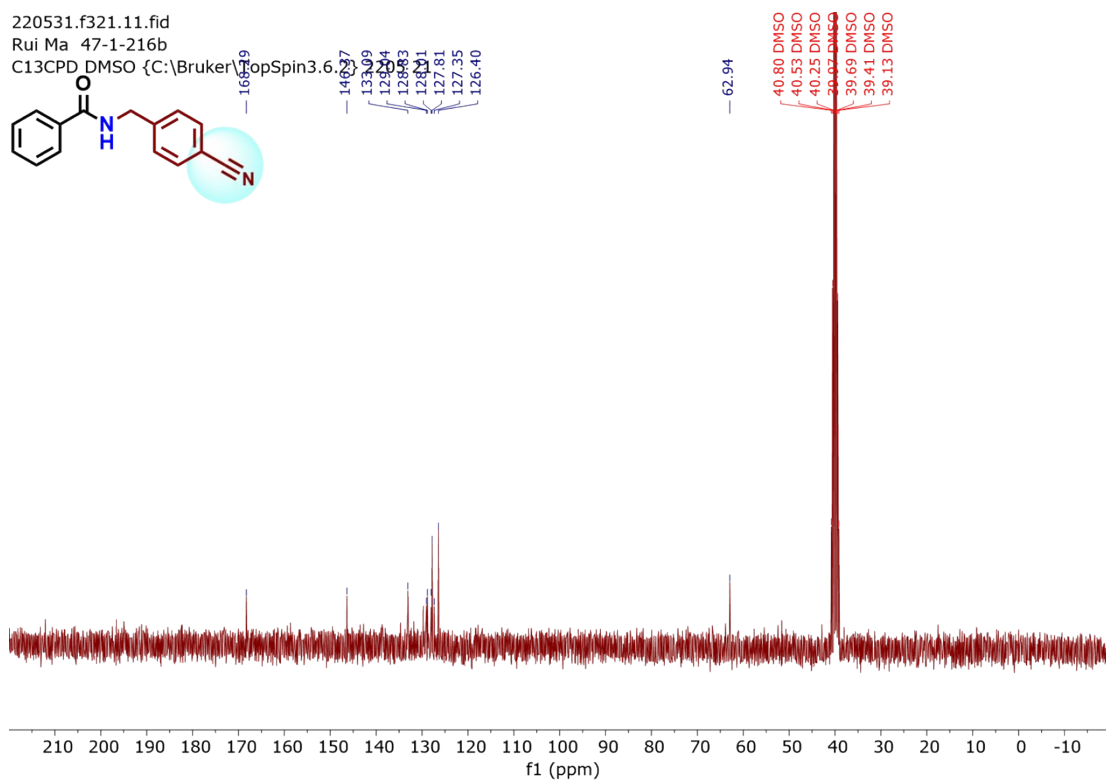

220308.f340.10.fid  
 Rui Ma 47-1-119  
 PROTON DMSO {C:\Bruker\TopSpin3.6.2} 2203 40

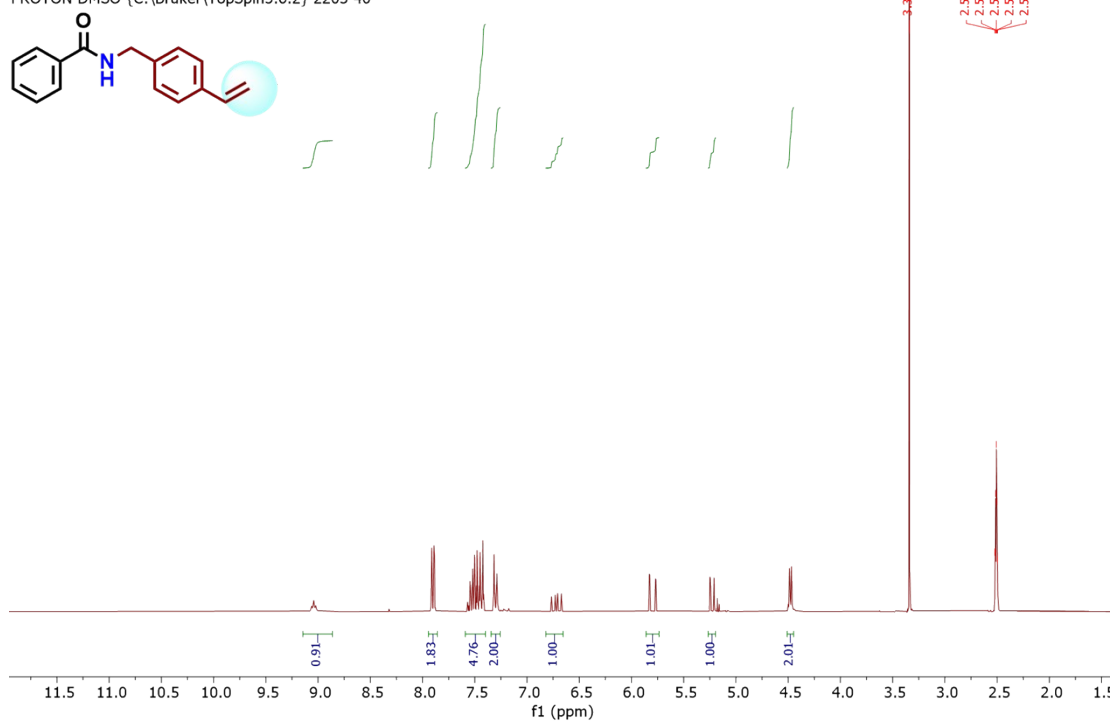

220308.f340.11.fid  
 Rui Ma 47-1-119  
 C13CPD DMSO {C:\Bruker\TopSpin3.6.2}

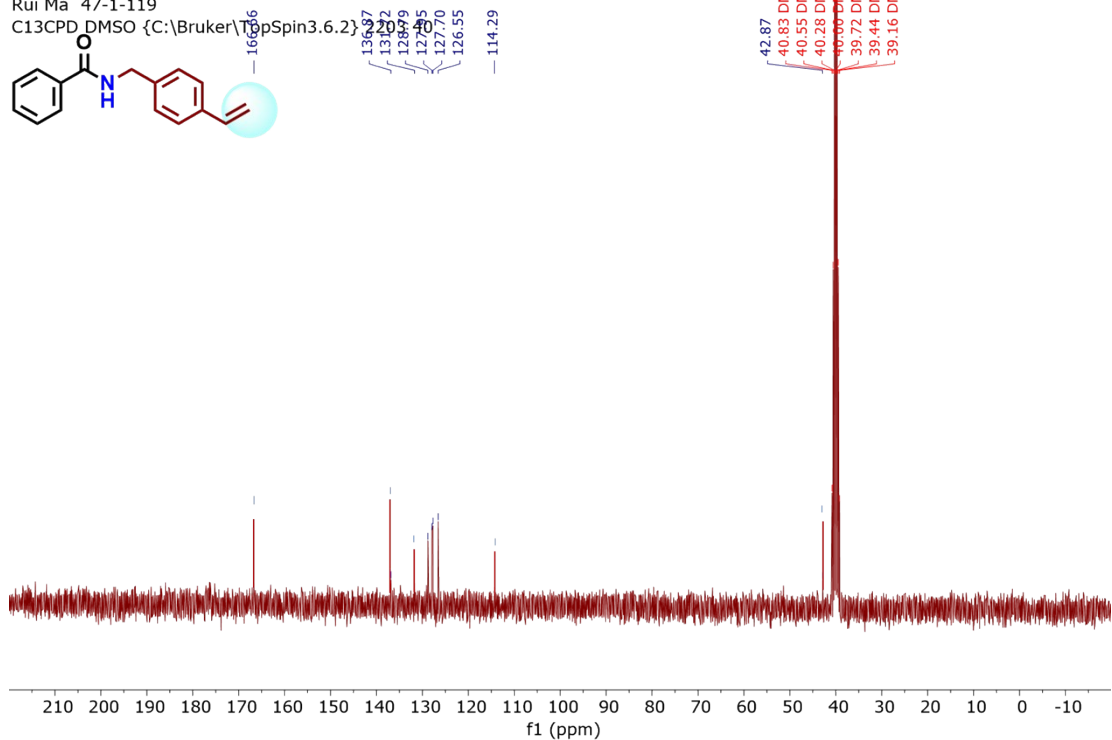

210526.370.10.fid  
Jie Gao 170-1-68b  
Au1H DMSO {C:\Bruker\TopSpin3.6.2} 2105 10

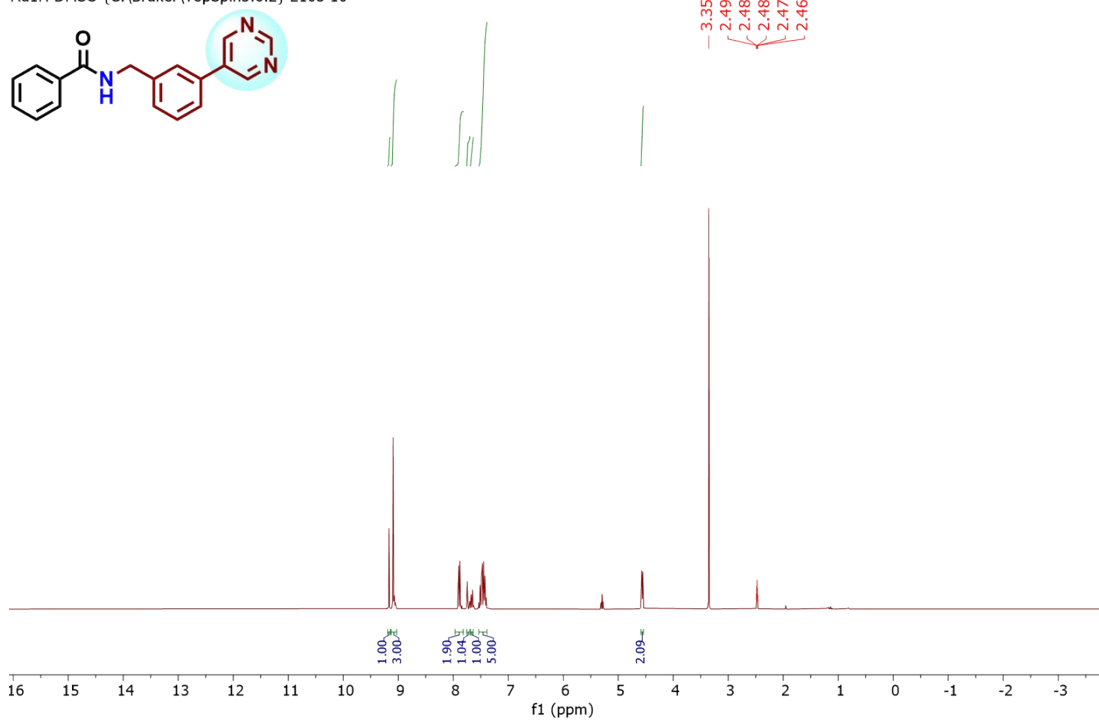

210526.370.11.fid  
Jie Gao 170-1-68b  
Au13C DMSO {C:\Bruker\TopSpin3.6.2} 2105 10

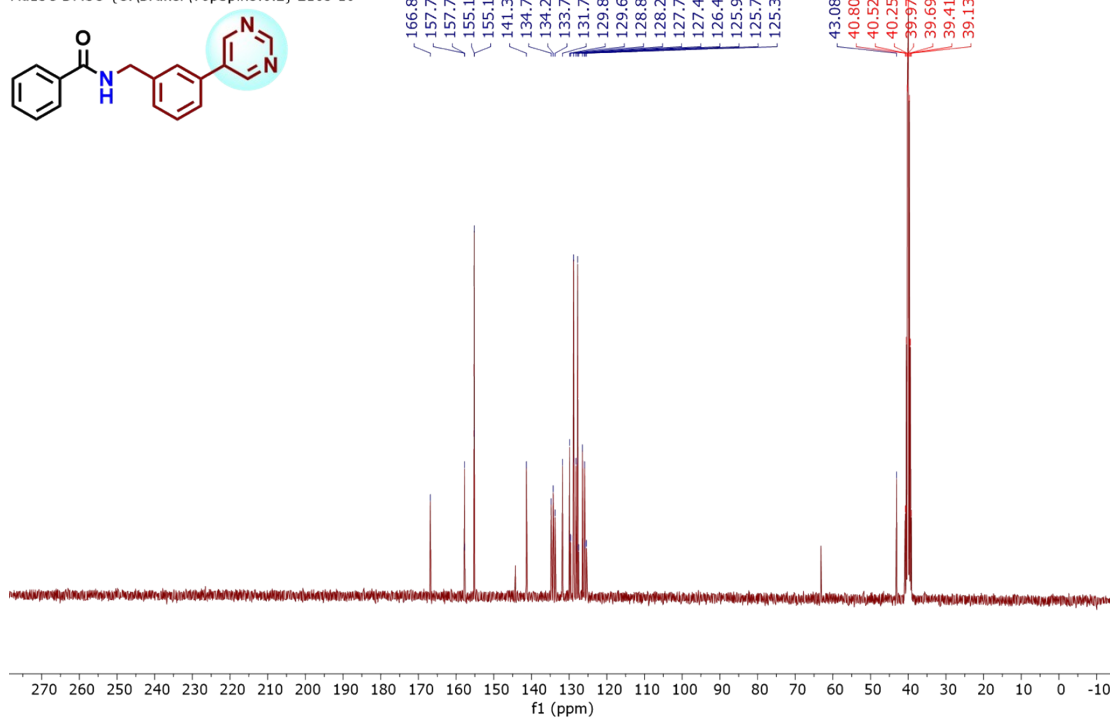

220518.316.10.fid  
 Rui Ma 47-1-203b  
 Au1H DMSO {C:\Bruker\TopSpin3.6.2} 2205 16

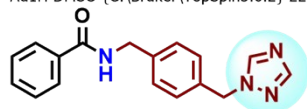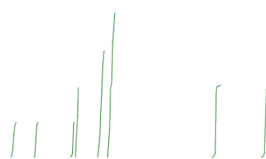

2.52 DMSO  
 2.51 DMSO  
 2.51 DMSO  
 2.50 DMSO  
 2.50 DMSO

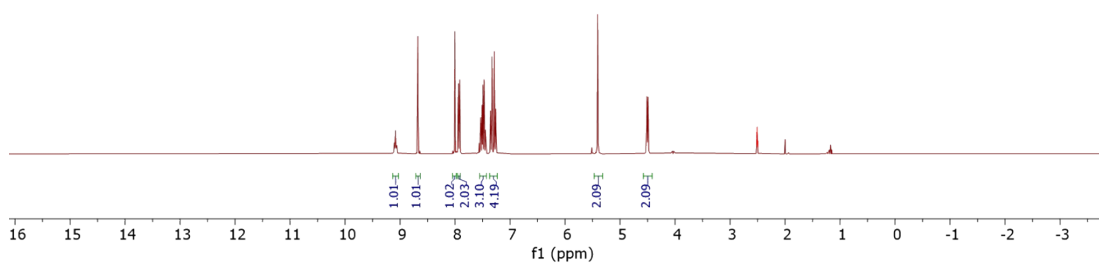

220518.316.11.fid  
 Rui Ma 47-1-203b  
 Au13C DMSO {C:\Bruker\TopSpin3.6.2} 2205 16

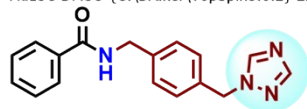

166.76  
 152.18  
 144.60  
 139.99  
 135.23  
 134.80  
 131.72  
 128.78  
 128.44  
 128.01  
 127.74

52.37  
 42.87  
 40.80 DMSO  
 40.53 DMSO  
 40.25 DMSO  
 39.97 DMSO  
 39.69 DMSO  
 39.41 DMSO  
 39.13 DMSO

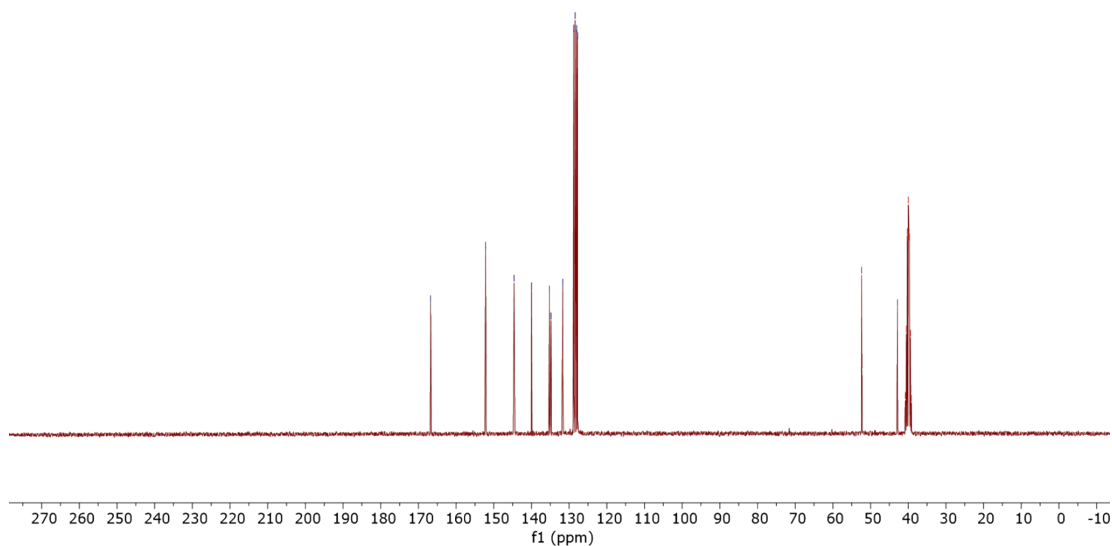

210621.442.10.fid  
Jie Gao 170-3-14  
Au1H DMSO {C:\Bruker\TopSpin3.5pl6} 2106 42

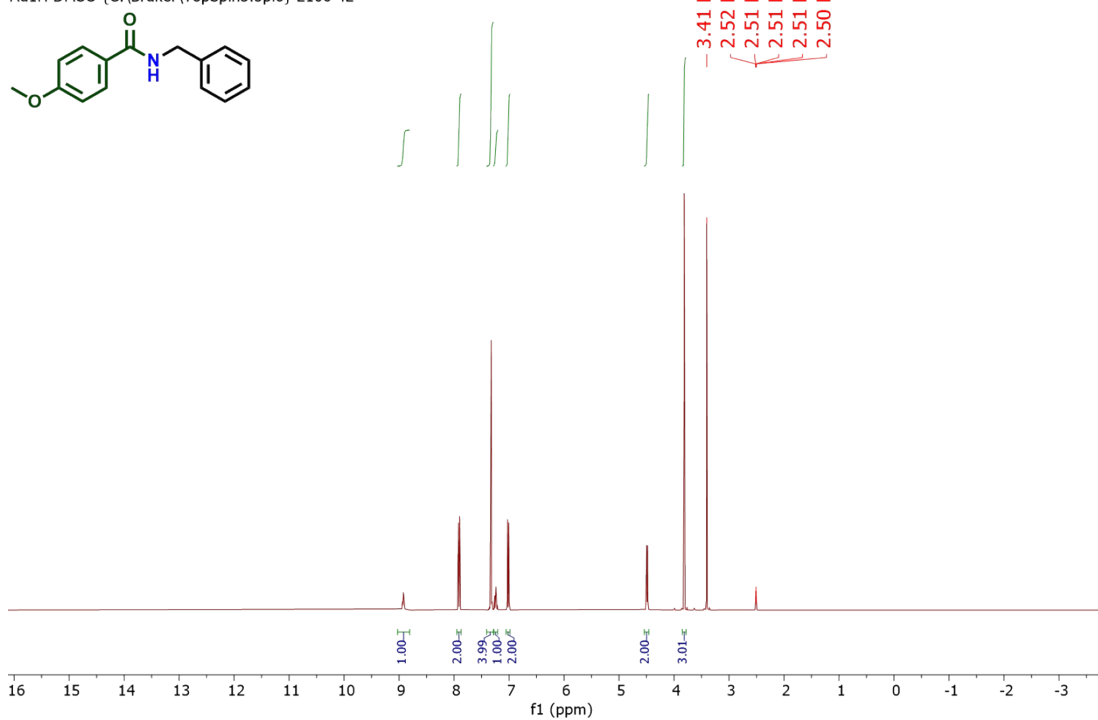

210621.442.11.fid  
Jie Gao 170-3-14  
Au13C DMSO {C:\Bruker\TopSpin3.5pl6} 2106 42

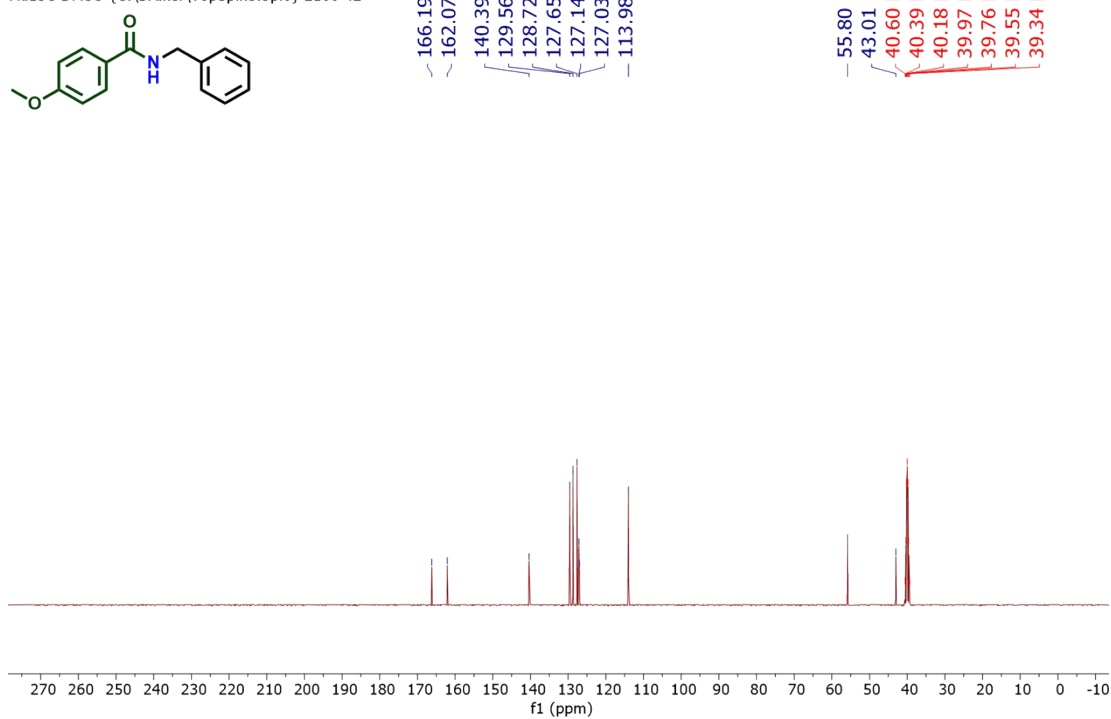

211021.341.10.fid  
 Rui Ma 47-1-6  
 Au1H CDCl<sub>3</sub> {C:\Bruker\TopSpin3.6.2} 2110 41

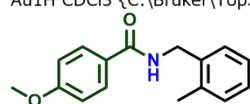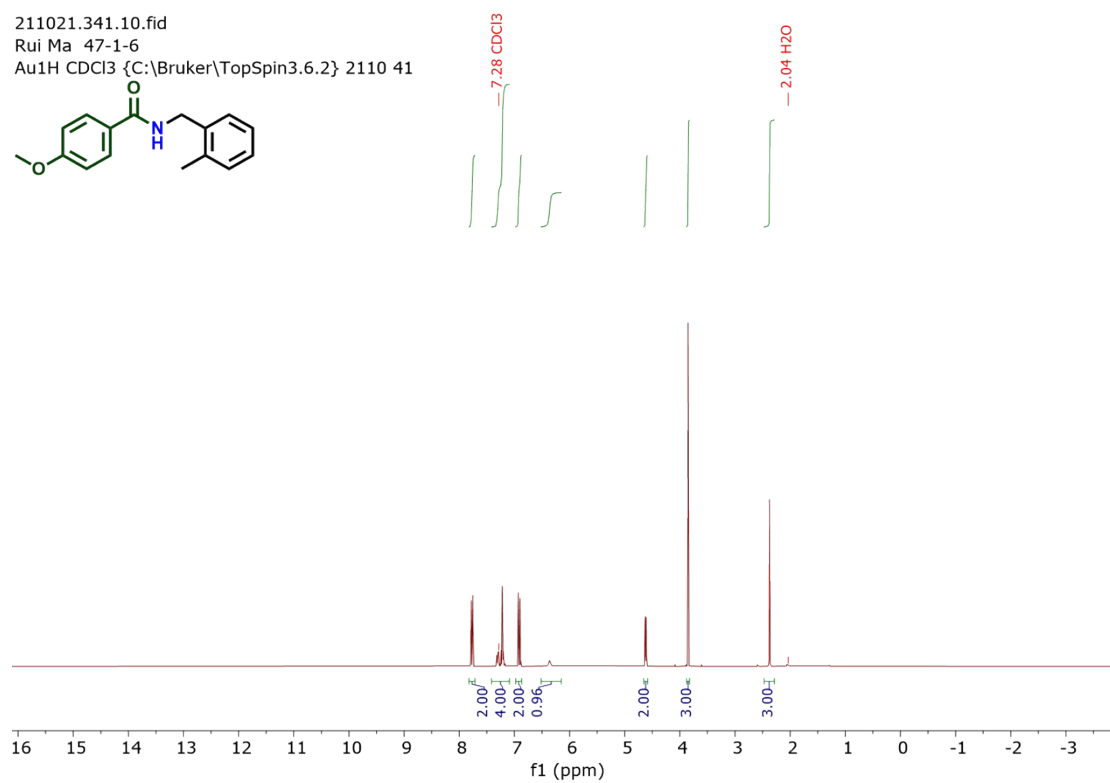

211021.341.11.fid  
 Rui Ma 47-1-6  
 Au13C CDCl<sub>3</sub> {C:\Bruker\TopSpin3.6.2} 2110 41

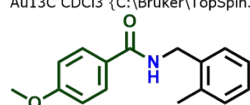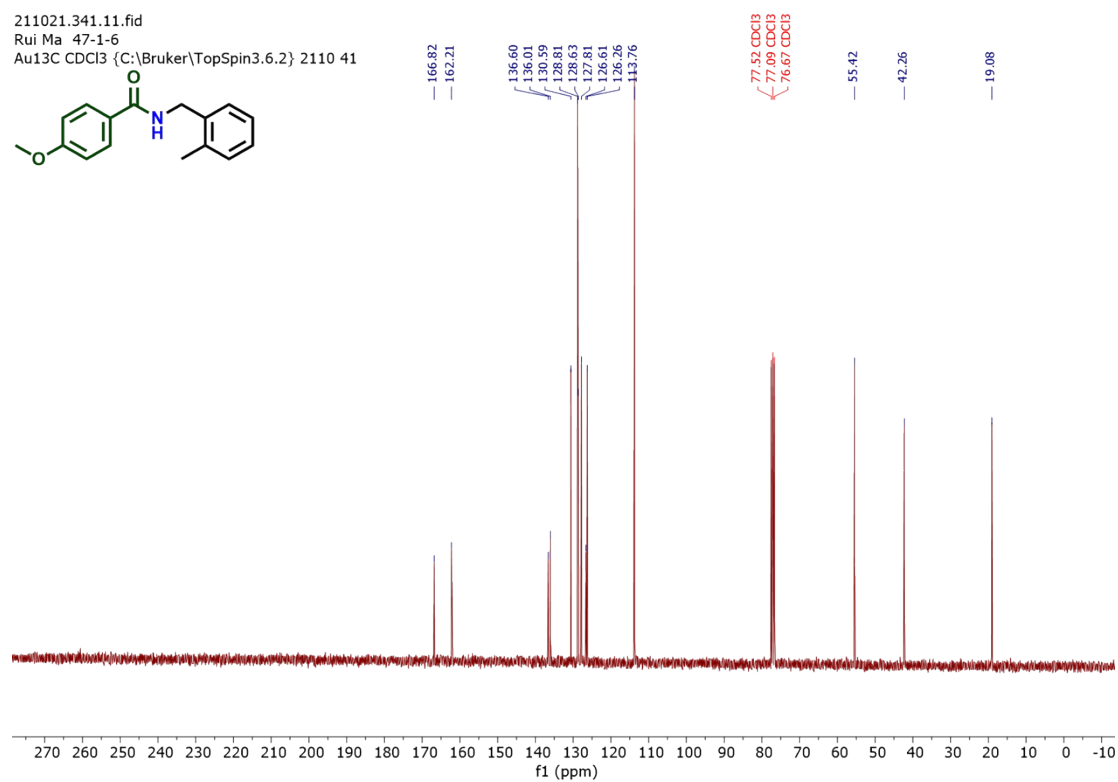

210621.458.10.fid  
Jie Gao 170-3-15  
Au1H DMSO {C:\Bruker\TopSpin3.5pl6} 2106 58

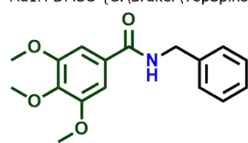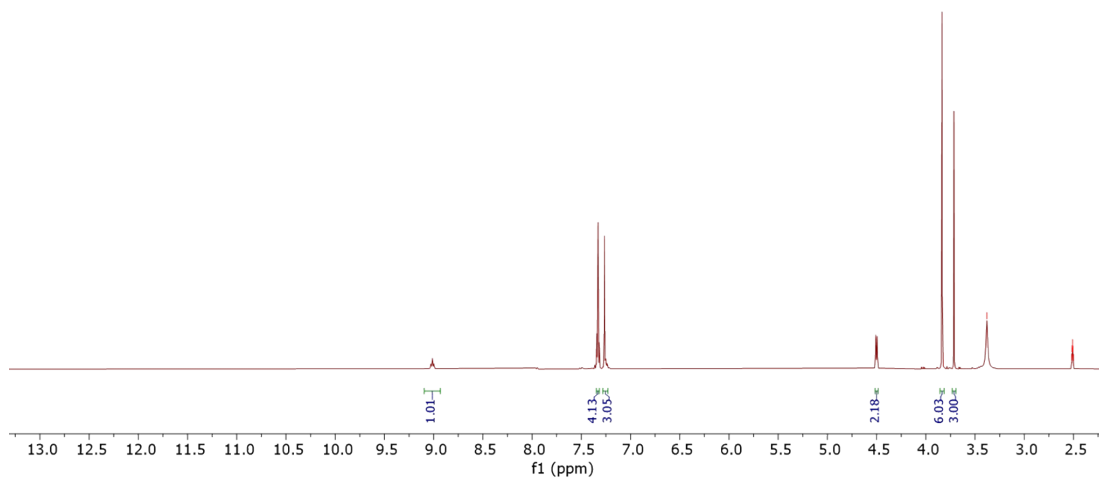

210621.458.11.fid  
Jie Gao 170-3-15  
Au13C DMSO {C:\Bruker\TopSpin3.5pl6} 2106 58

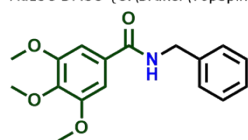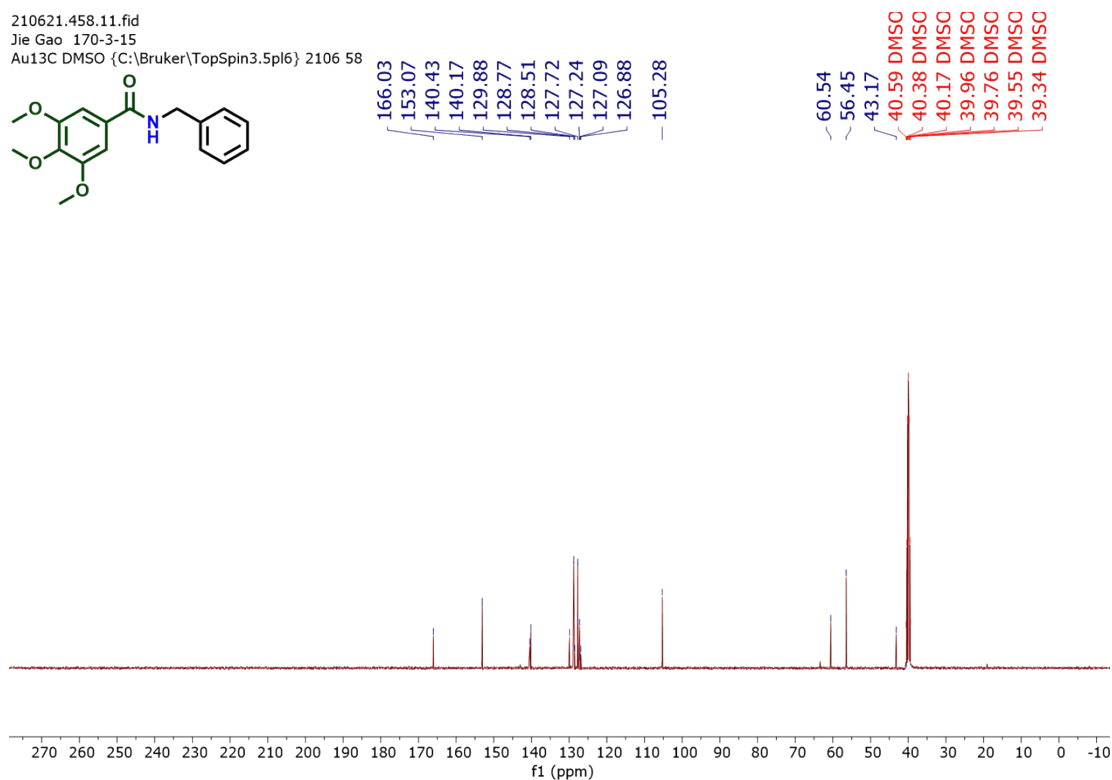

211021.338.10.fid  
 Rui Ma 47-1-9  
 Au1H CDCl<sub>3</sub> {C:\Bruker\TopSpin3.6.2} 2110 38

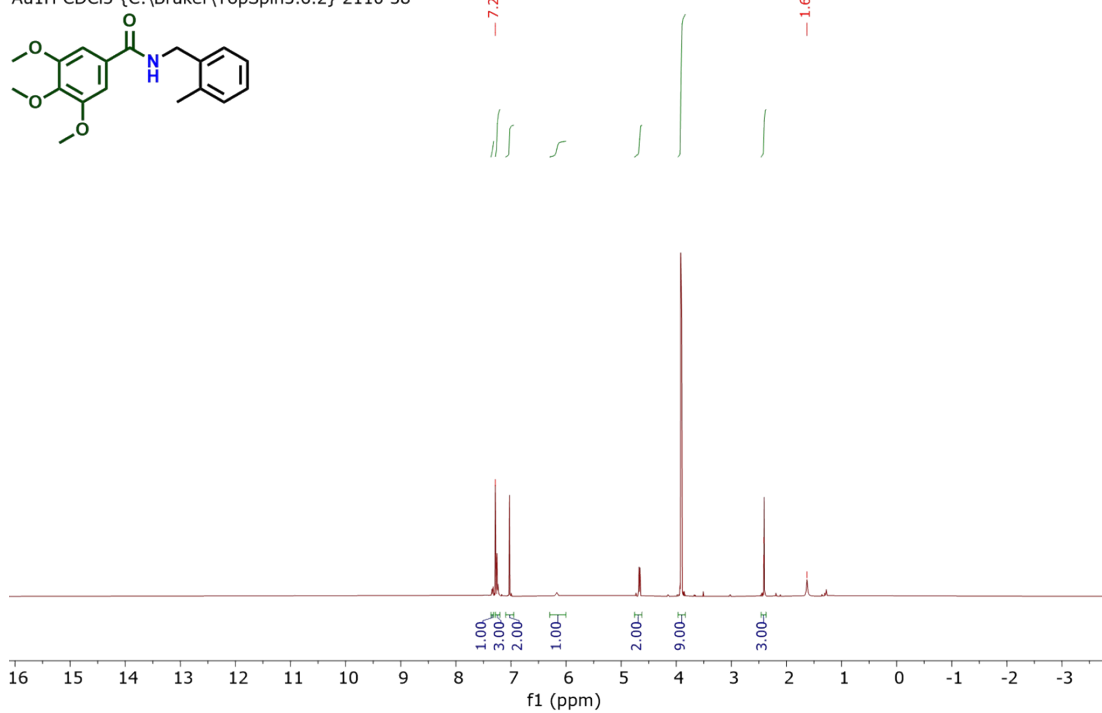

211021.338.11.fid  
 Rui Ma 47-1-9  
 Au13C CDCl<sub>3</sub> {C:\Bruker\TopSpin3.6.2} 2110 38

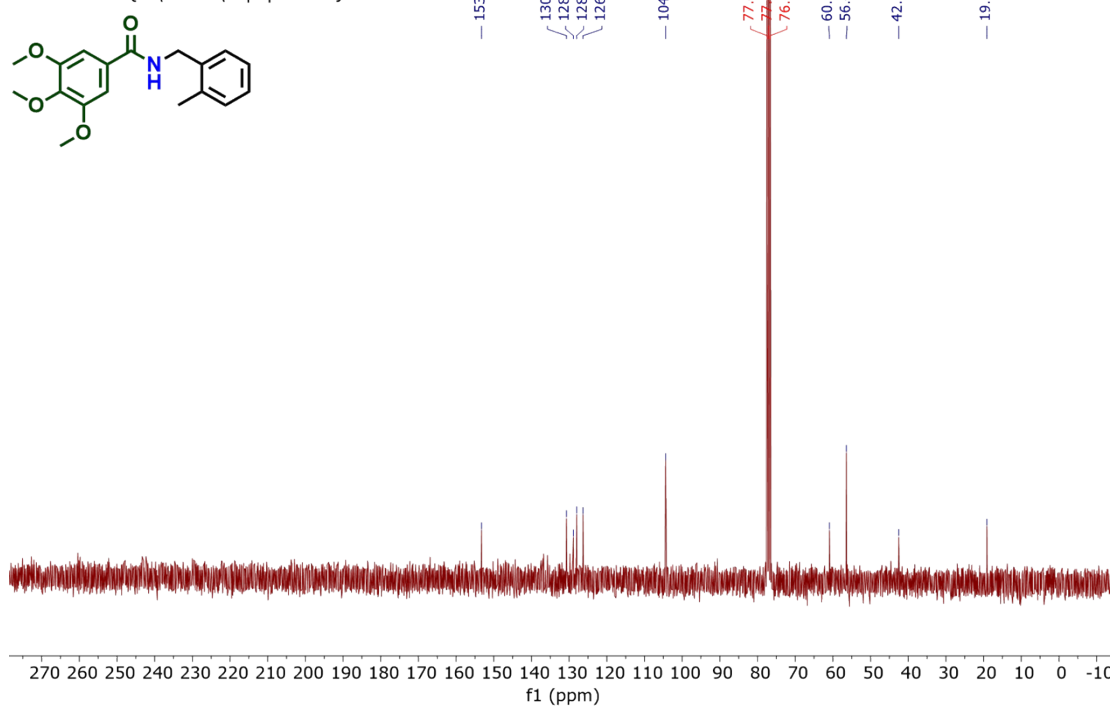

PROTON DMSO {C:\Bruker\TopSpin3.6.2} 2111 45

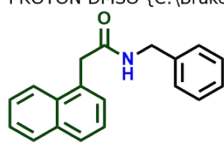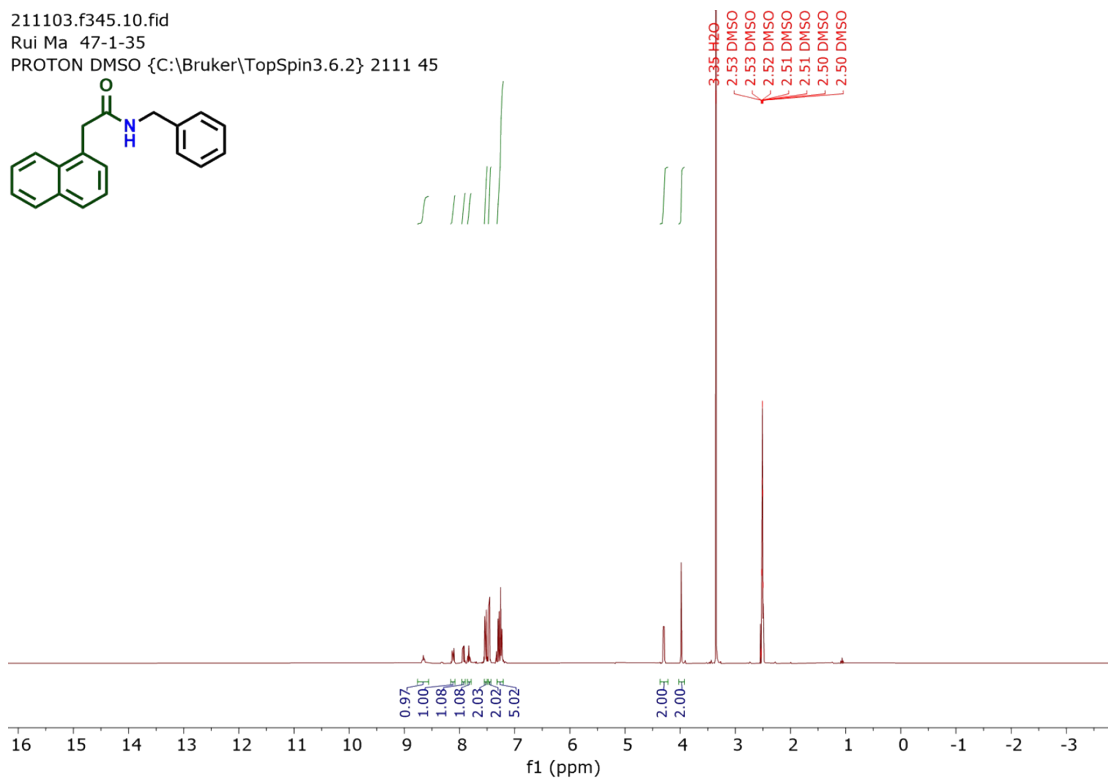

C13CPD DMSO {C:\Bruker\TopSpin3.6.2}

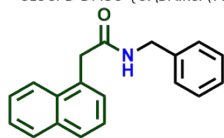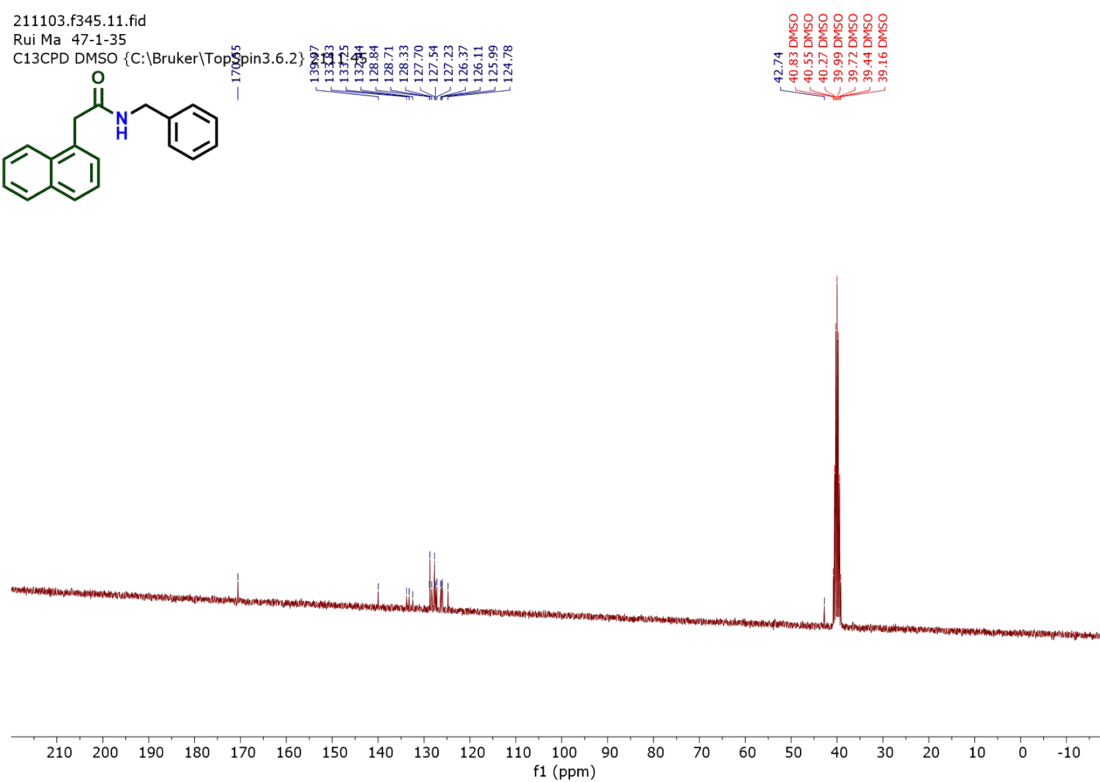

210621.454.10.fid  
Jie Gao 170-3-12  
Au1H DMSO (C:\Bruker\TopSpin3.5pl6) 2106 54

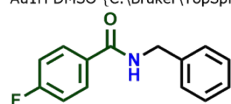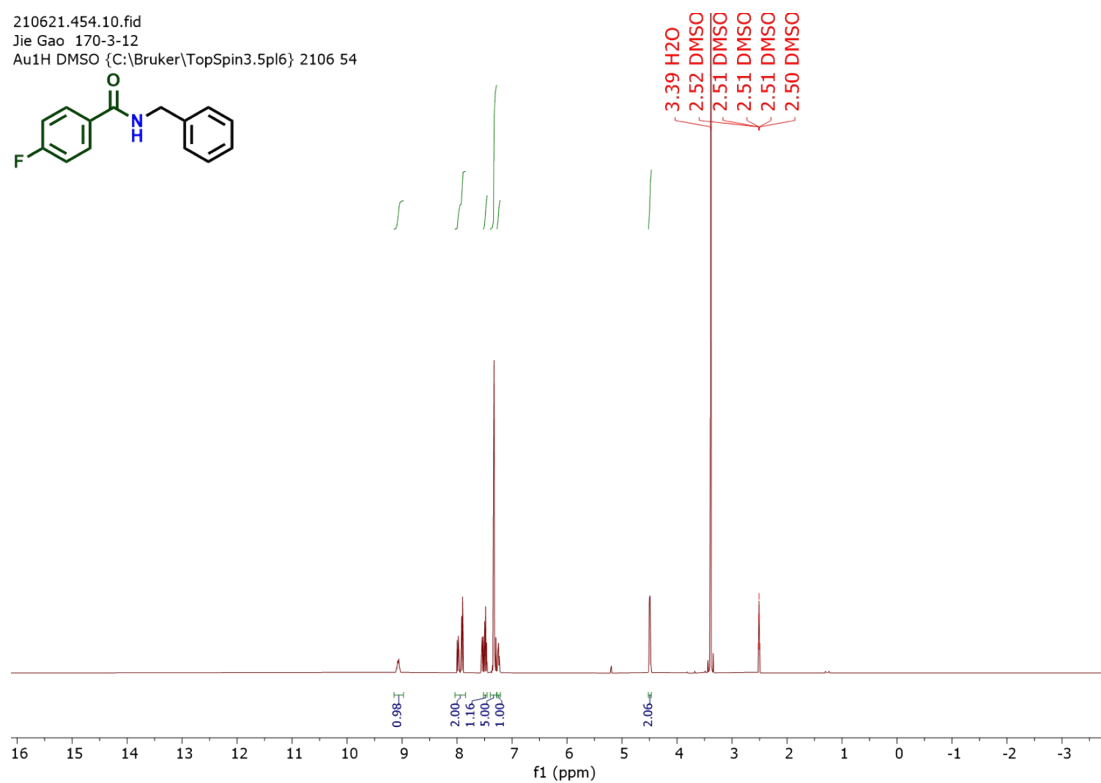

210621.454.11.fid  
Jie Gao 170-3-12  
Au13C DMSO (C:\Bruker\TopSpin3.5pl6) 2106 54

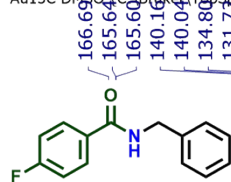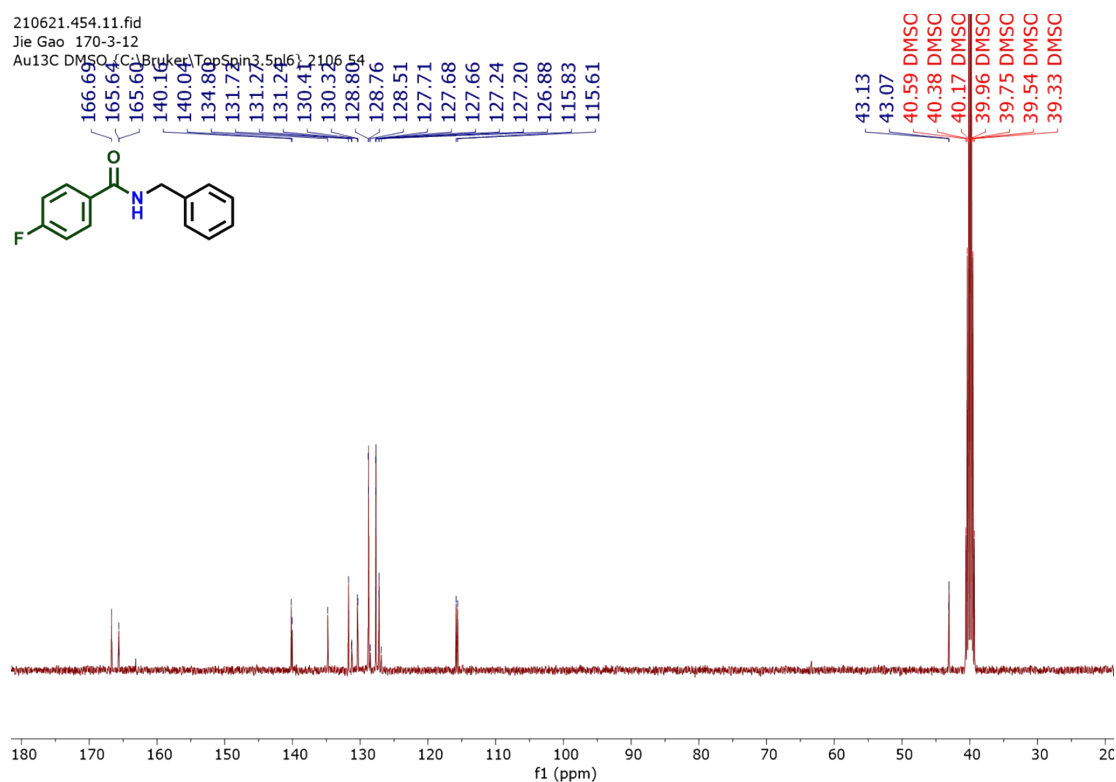

211021.334.10.fid  
 Rui Ma 47-1-8  
 Au1H CDCl<sub>3</sub> {C:\Bruker\TopSpin3.6.2} 2110 34

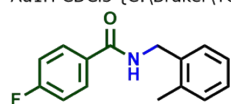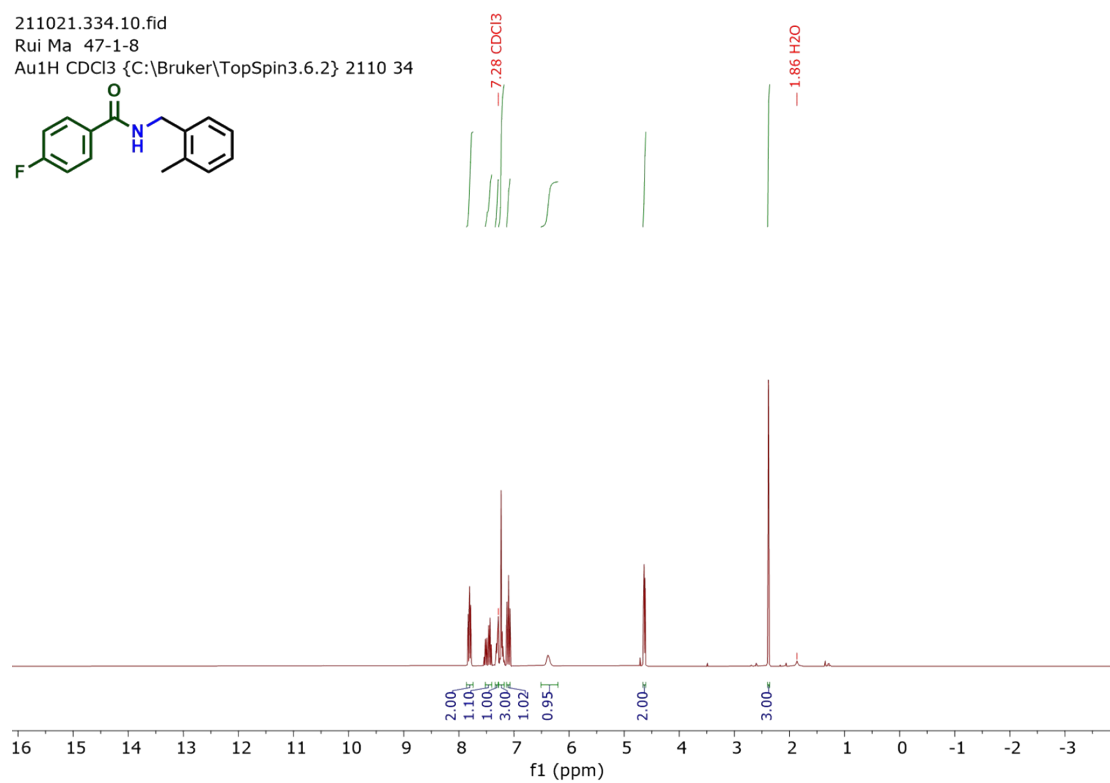

211021.334.11.fid  
 Rui Ma 47-1-8  
 Au13C CDCl<sub>3</sub> {C:\Bruker\TopSpin3.6.2} 2110 34

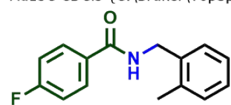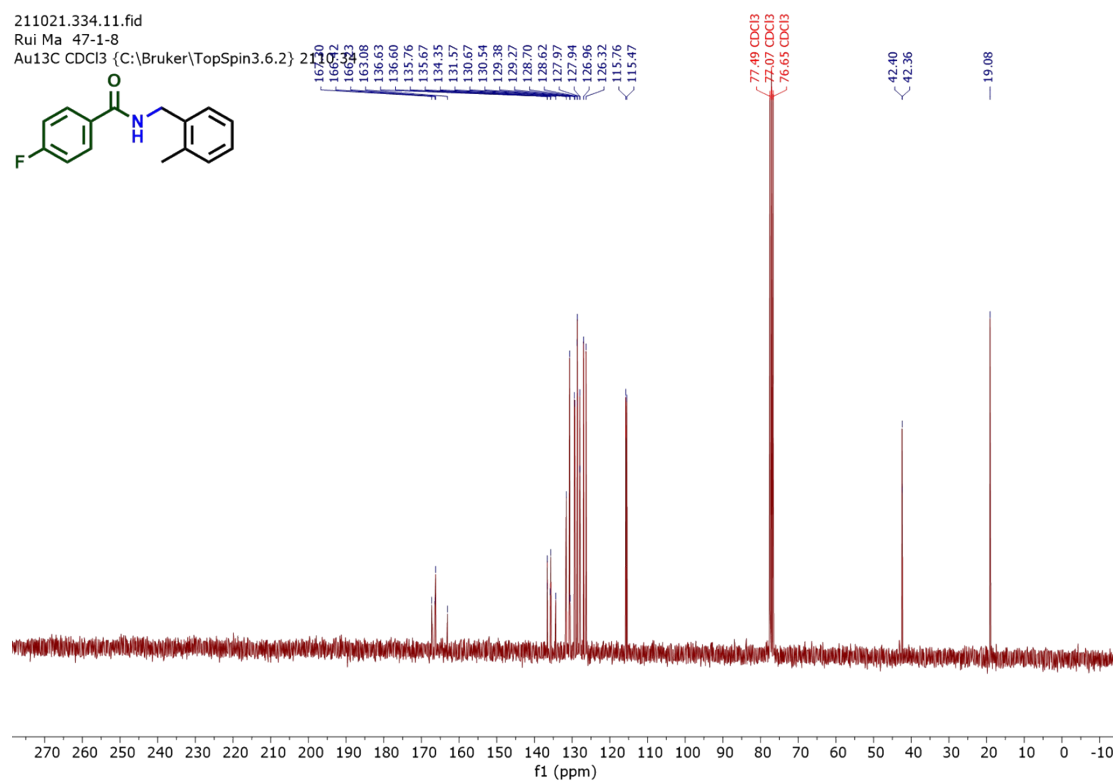

211103.f351.10.fid  
 Rui Ma 47-1-38a  
 PROTON DMSO {C:\Bruker\TopSpin3.6.2} 2111 51

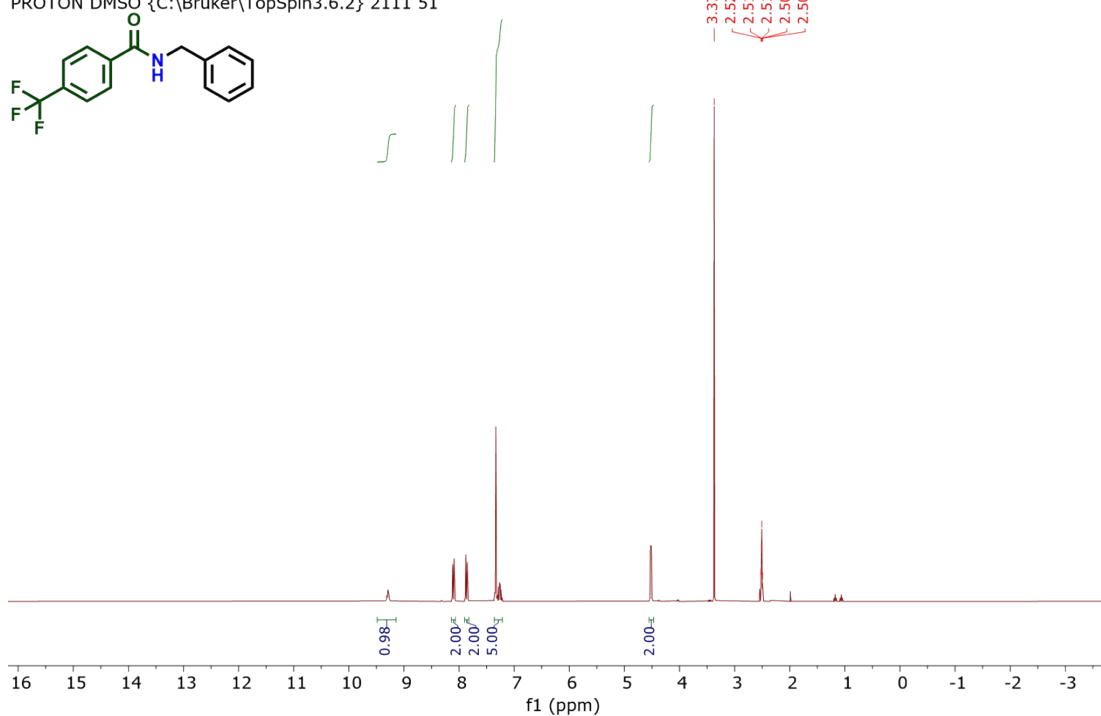

211103.f351.11.fid  
 Rui Ma 47-1-38a  
 C13CPD DMSO {C:\Bruker\TopSpin3.6.2} 2111 51

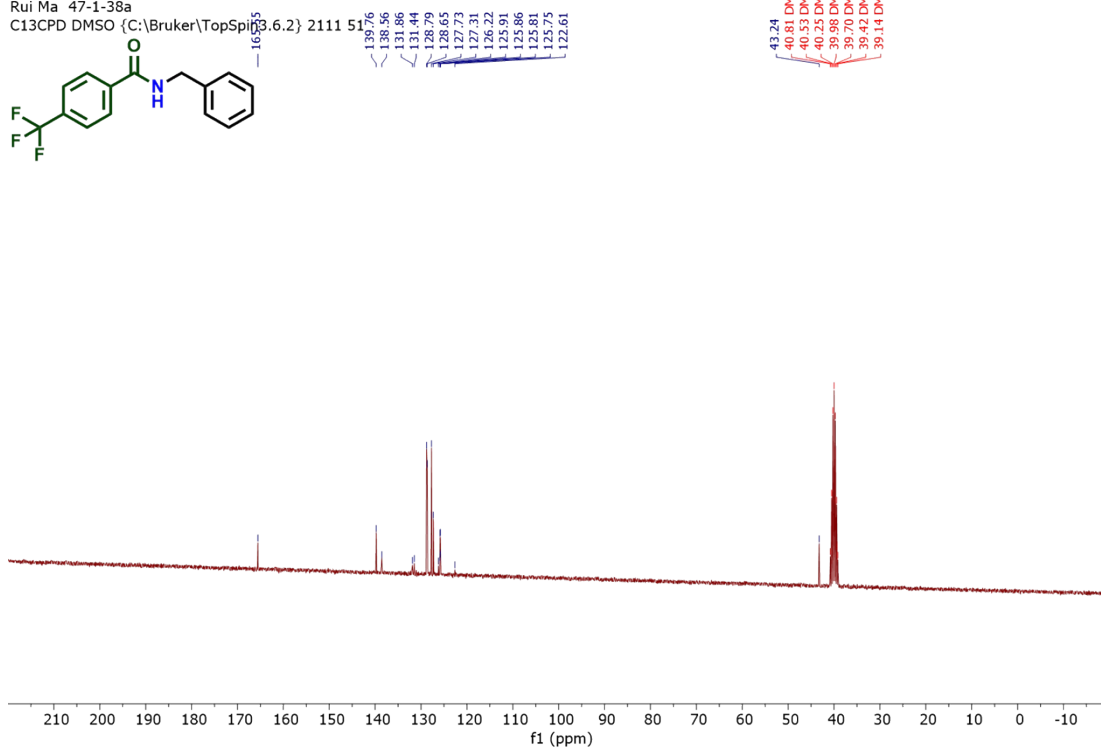

211105.350.10.fid  
 Rui Ma 47-1-44b  
 Au1H CDCl<sub>3</sub> {C:\Bruker\TopSpin3.6.2} 2111 50

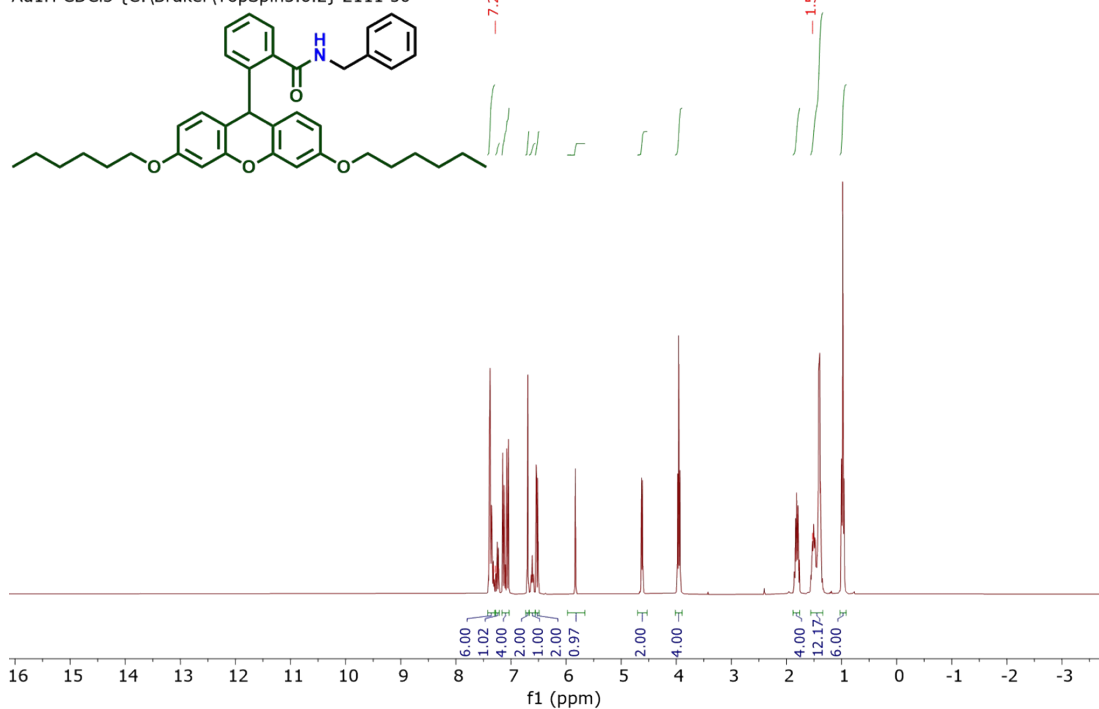

211105.350.11.fid  
 Rui Ma 47-1-44b  
 Au13C CDCl<sub>3</sub> {C:\Bruker\TopSpin3.6.2} 2111 50

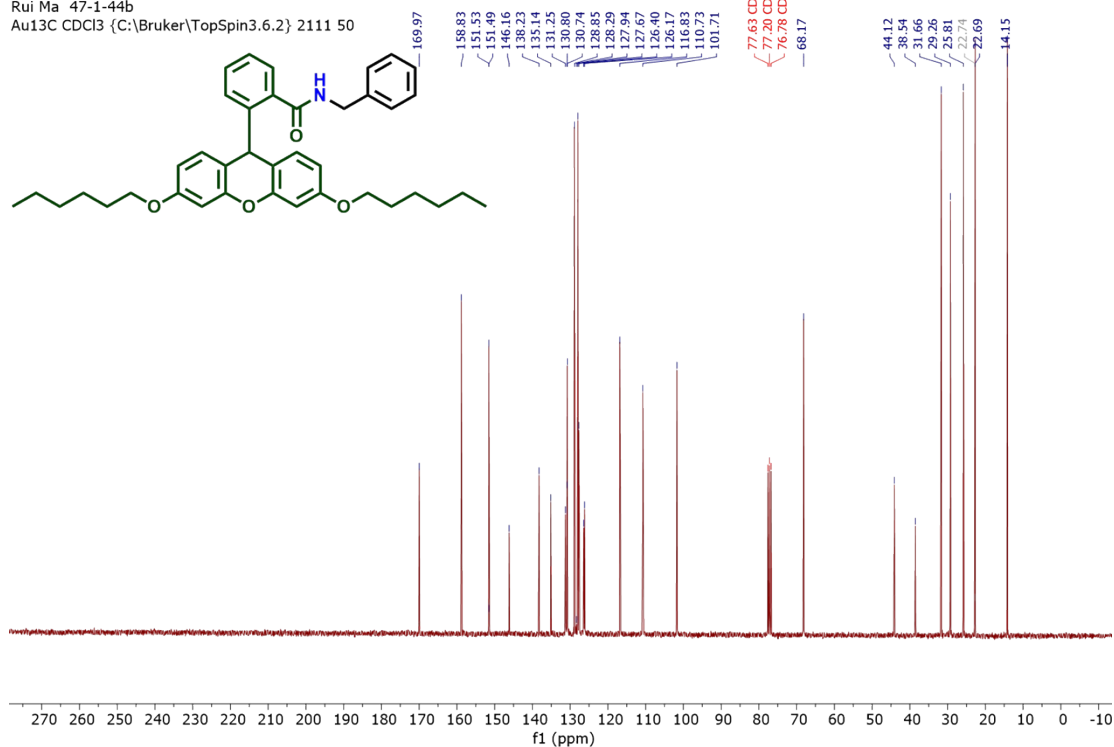

211103.f347.10.fid  
 Rui Ma 47-1-32  
 PROTON DMSO {C:\Bruker\TopSpin3.6.2} 2111 47

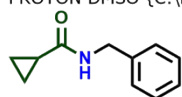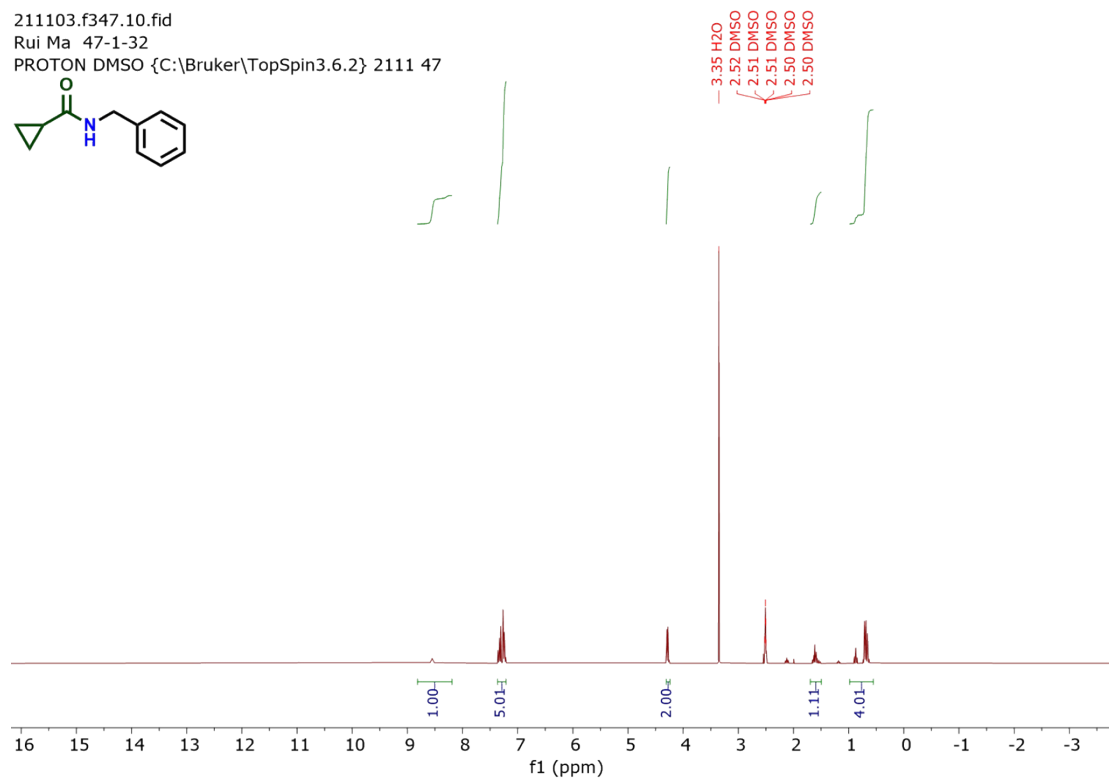

211103.f347.11.fid  
 Rui Ma 47-1-32  
 C13CPD DMSO {C:\Bruker\TopSpin3.6.2} 2111 47

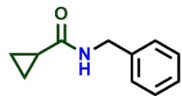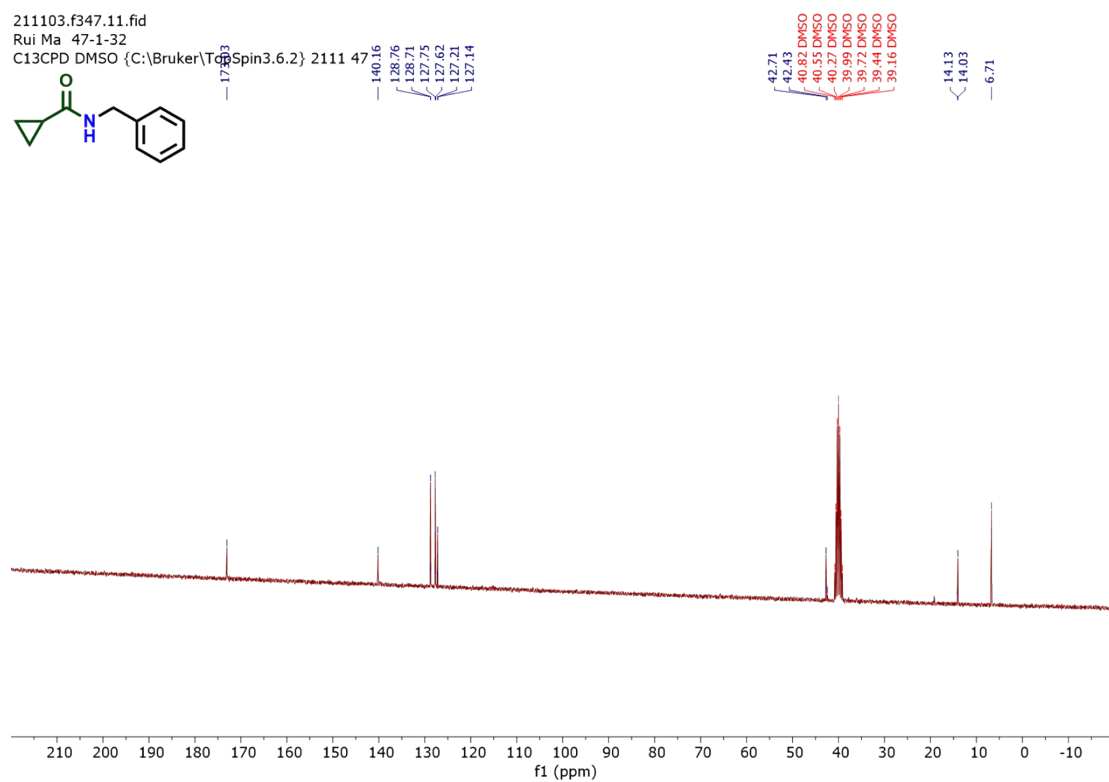

220308.f338.10.fid  
 Rui Ma 47-2-29  
 PROTON DMSO {C:\Bruker\TopSpin3.6.2} 2203 38

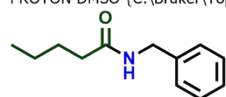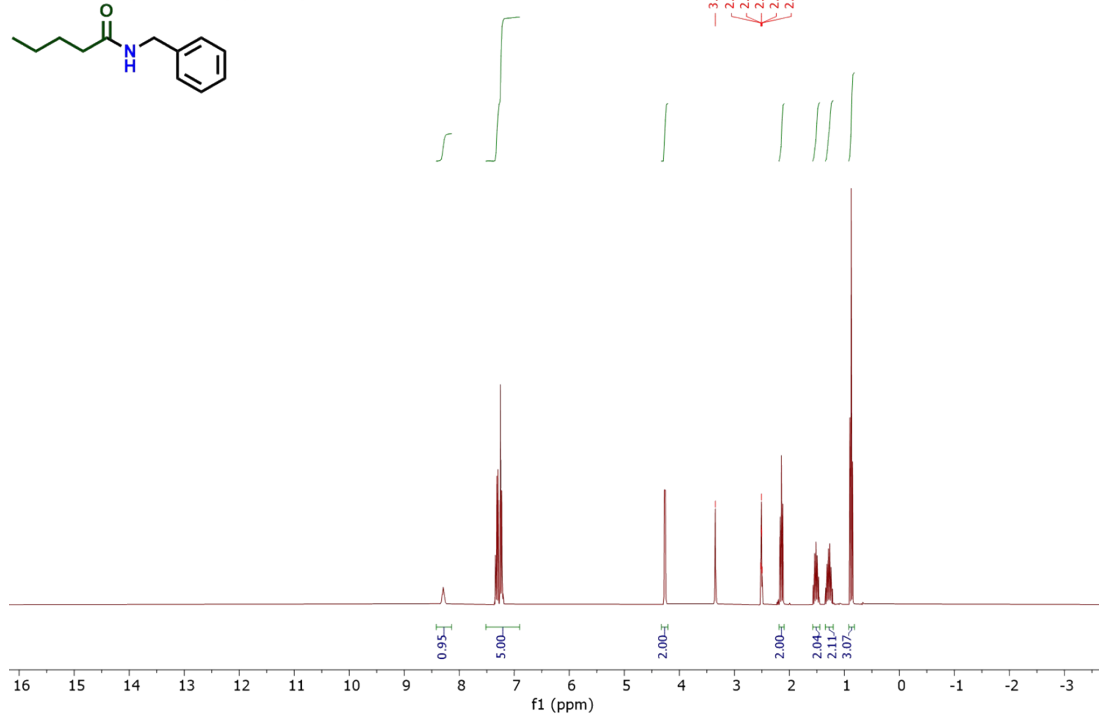

220308.f338.11.fid  
 Rui Ma 47-2-29  
 C13CPD DMSO {C:\Bruker\TopSpin3.6.2} 2203 38

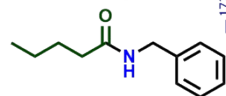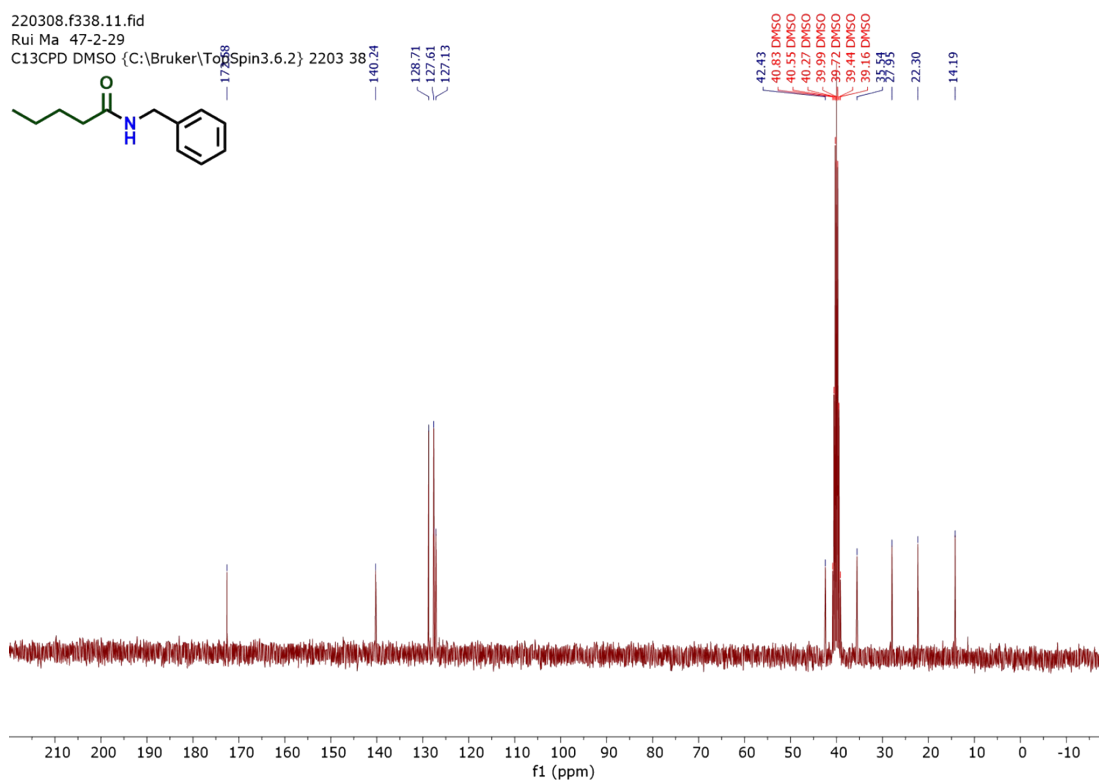

220308.f343.10.fid  
 Rui Ma 47-2-24a  
 PROTON CDCl<sub>3</sub> {C:\Bruker\TopSpin3.6.2} 2203 43

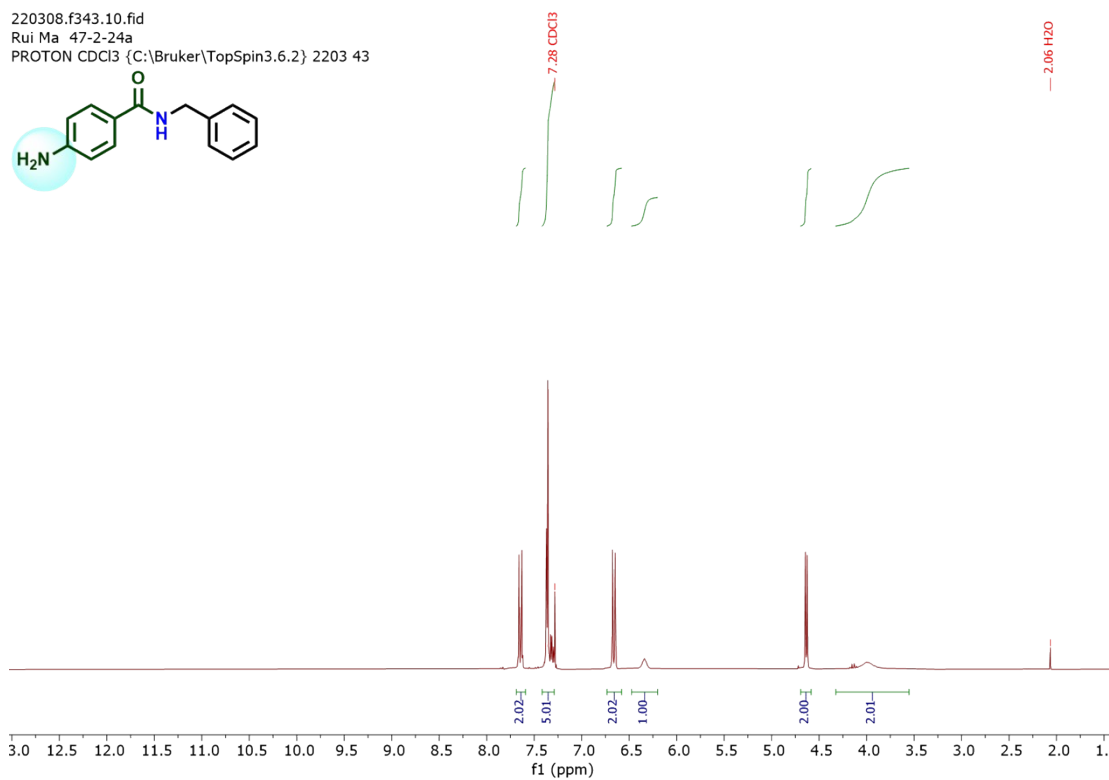

220308.f336.11.fid  
 Rui Ma 47-2-24b  
 C13CPD DMSO {C:\Bruker\TopSpin3.6.2} 2203 36

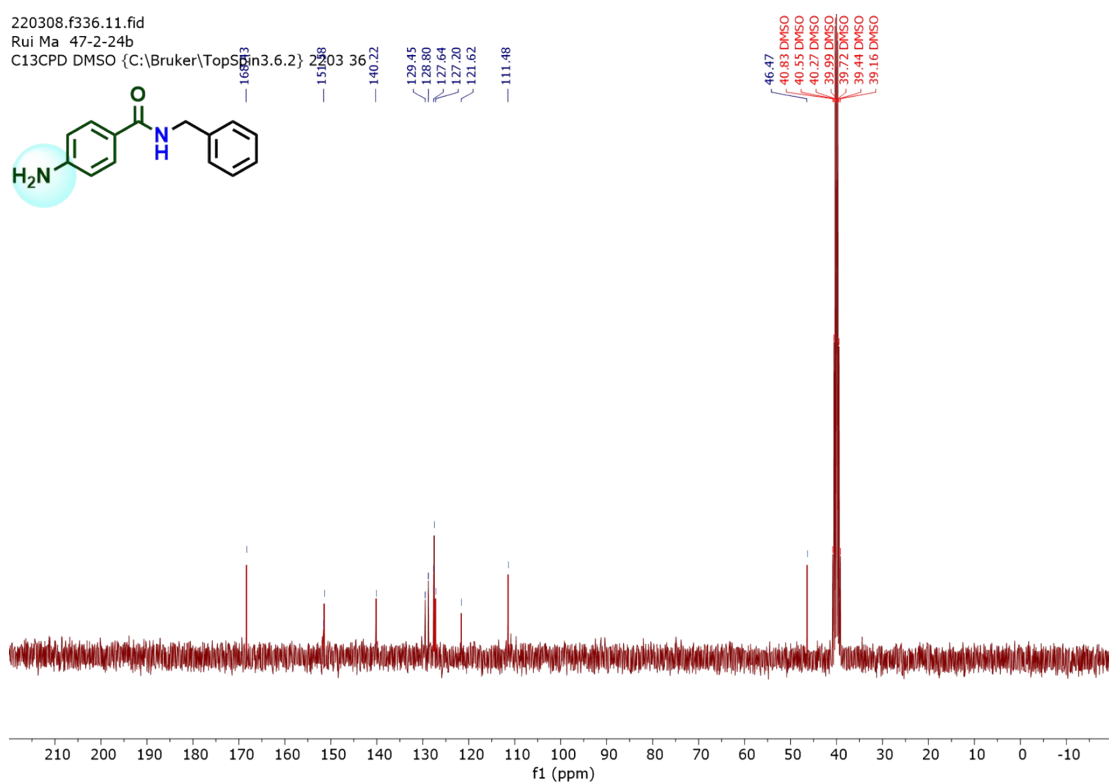

210511.321.10.fid  
Gao/ 170-3-5  
Au1H DMSO {C:\Bruker\TopSpin3.6.2} 2105 21

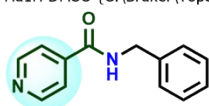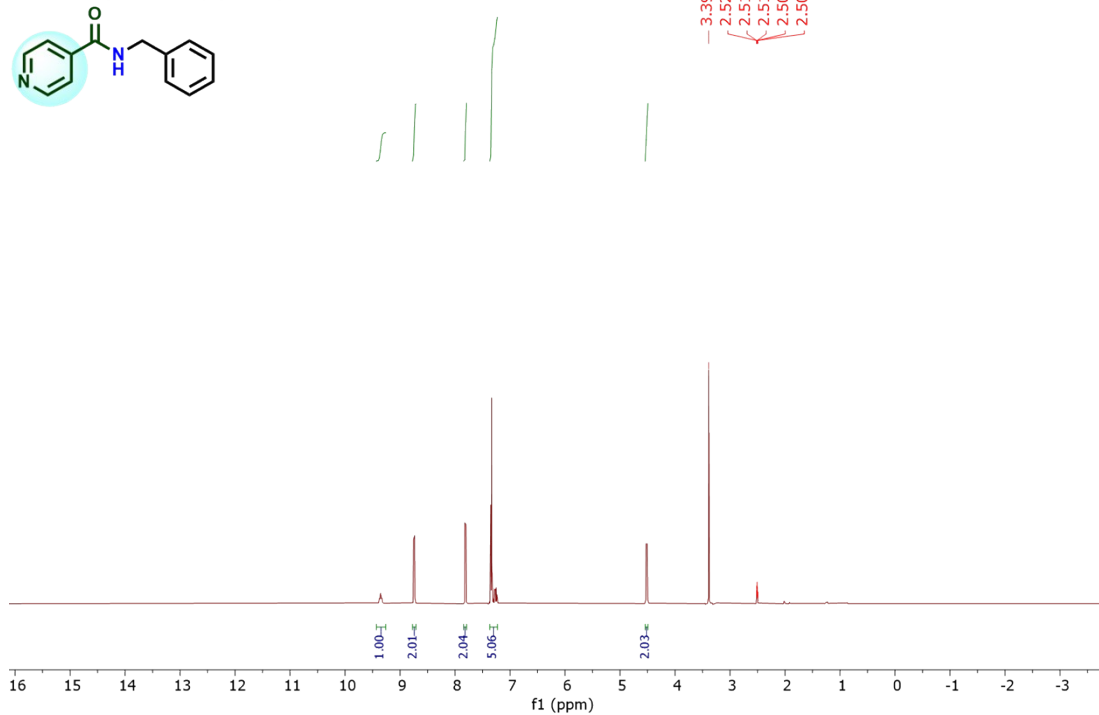

210511.321.11.fid  
Gao/ 170-3-5  
Au13C DMSO {C:\Bruker\TopSpin3.6.2} 2105 21

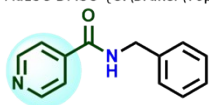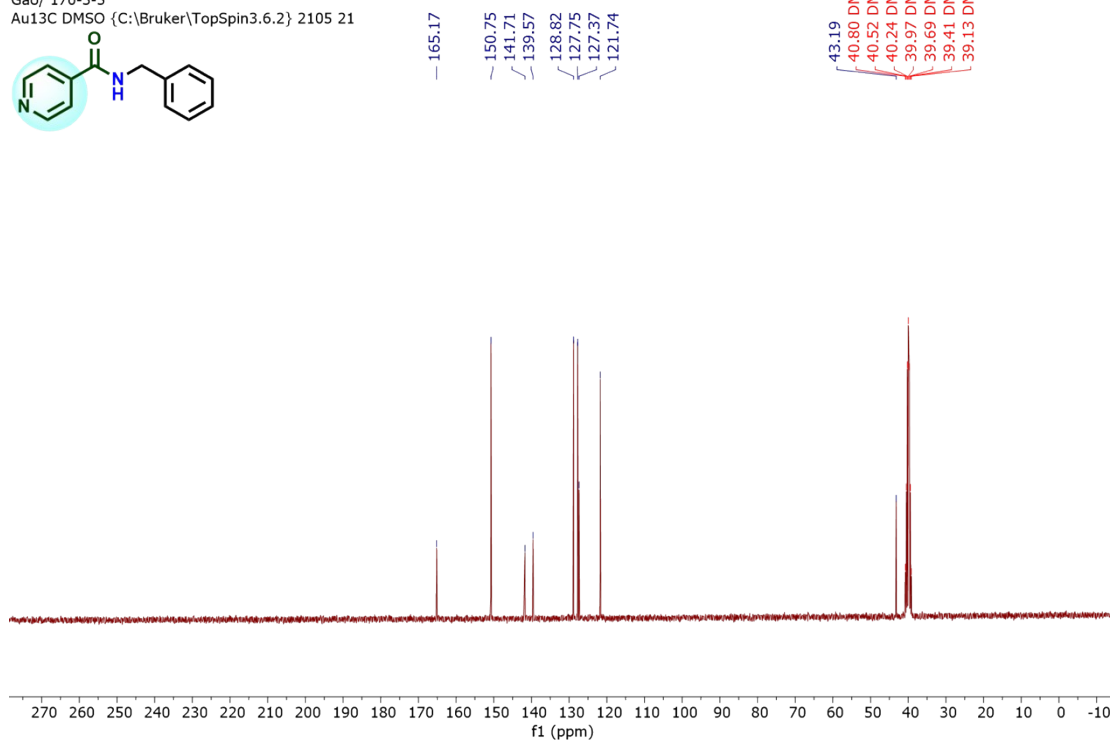

210511.320.10.fid  
Gao/ 170-3-4  
Au1H CDCl<sub>3</sub> {C:\Bruker\TopSpin3.6.2} 2105 20

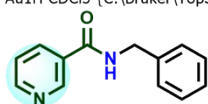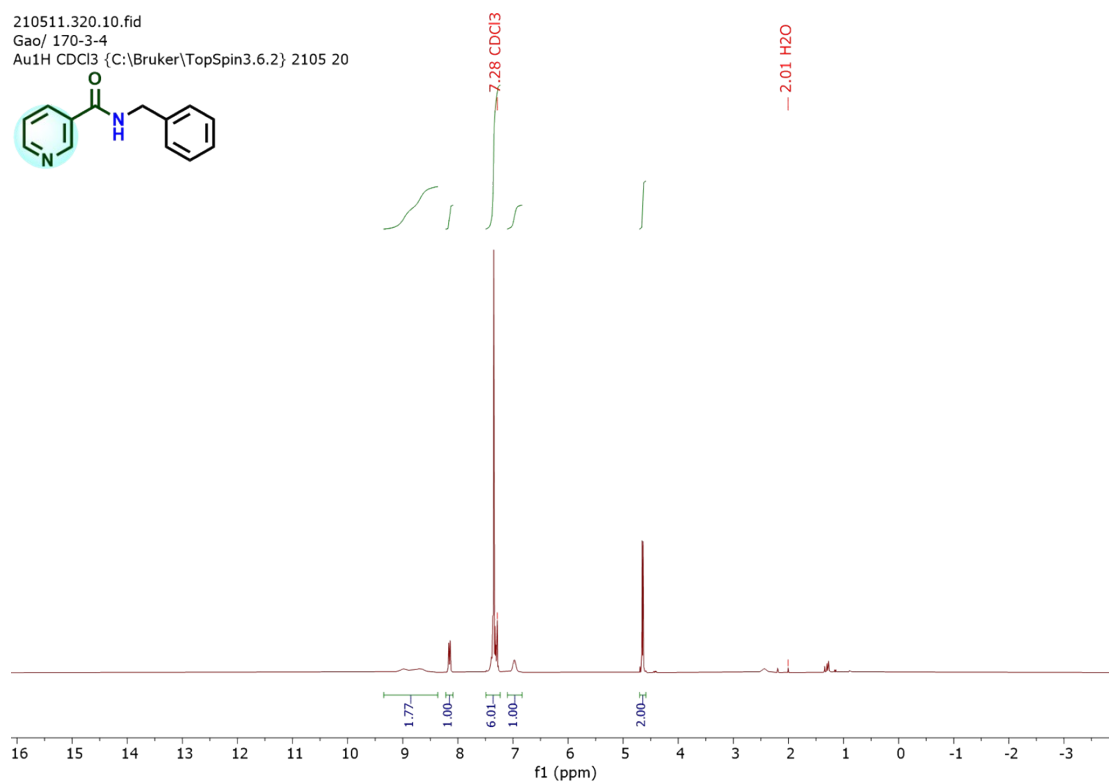

210511.320.11.fid  
Gao/ 170-3-4  
Au13C CDCl<sub>3</sub> {C:\Bruker\TopSpin3.6.2} 2105 20

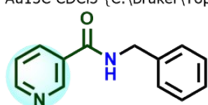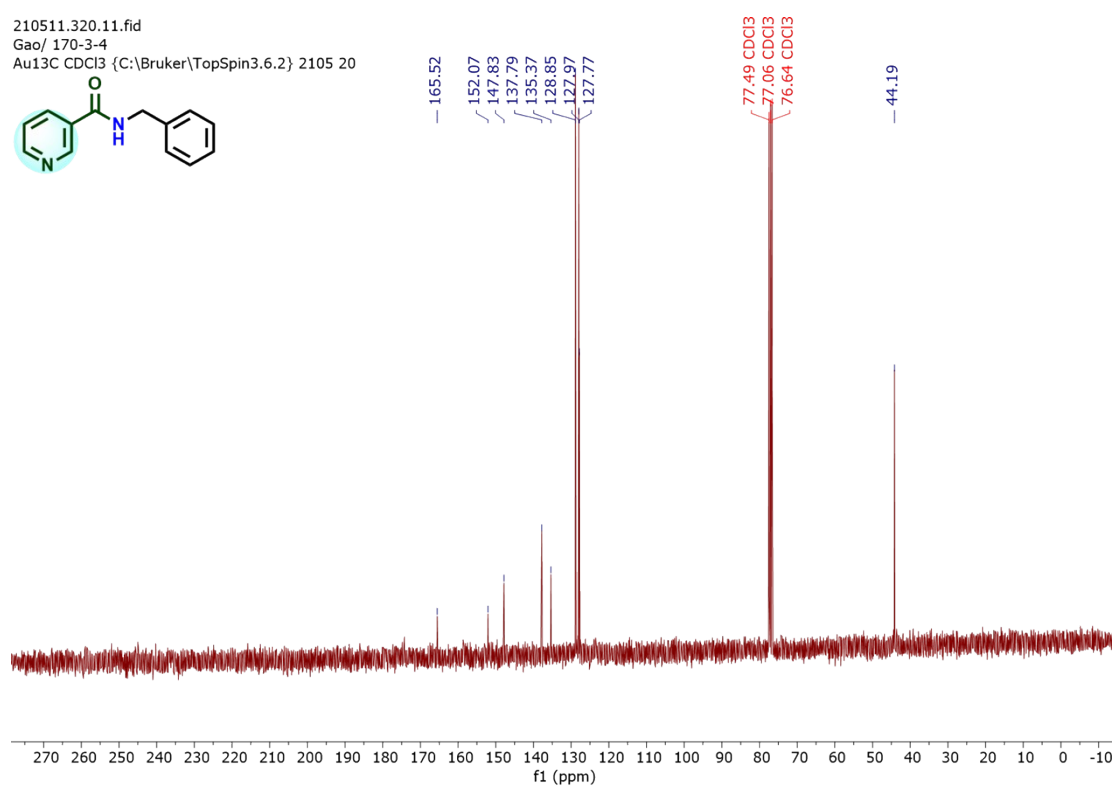

210621.455.10.fid  
Jie Gao 170-3-8  
Au1H DMSO {C:\Bruker\TopSpin3.5pl6} 2106 55

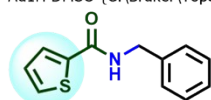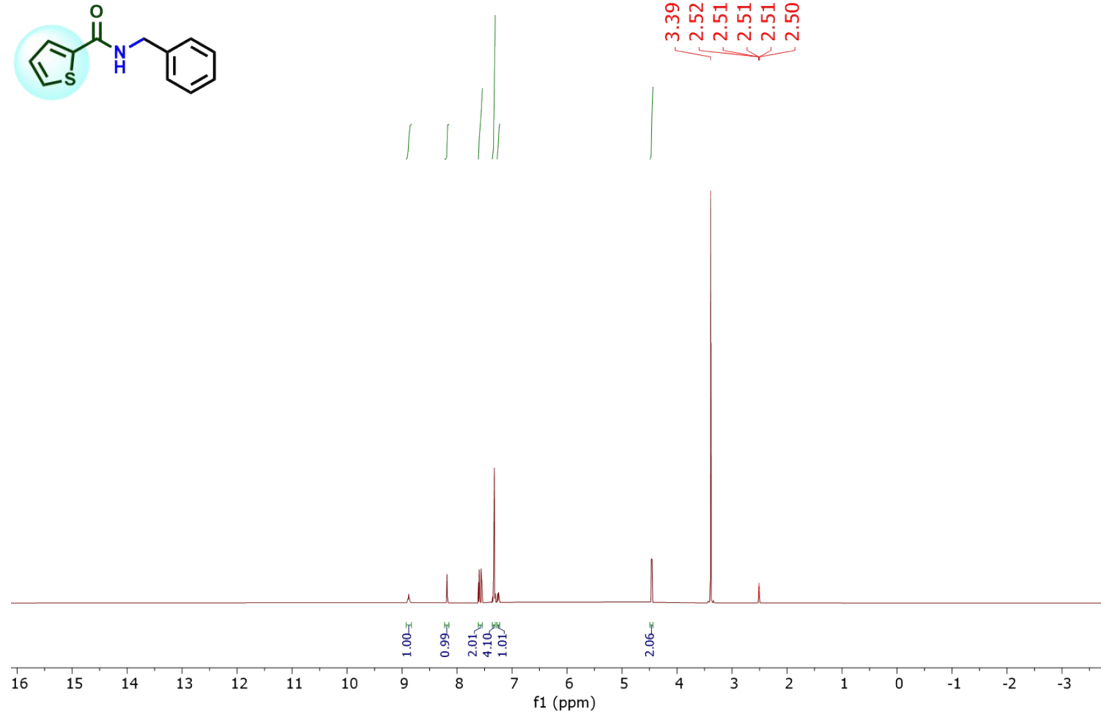

210621.455.11.fid  
Jie Gao 170-3-8  
Au13C DMSO {C:\Bruker\TopSpin3.5pl6} 2106 55

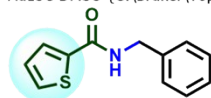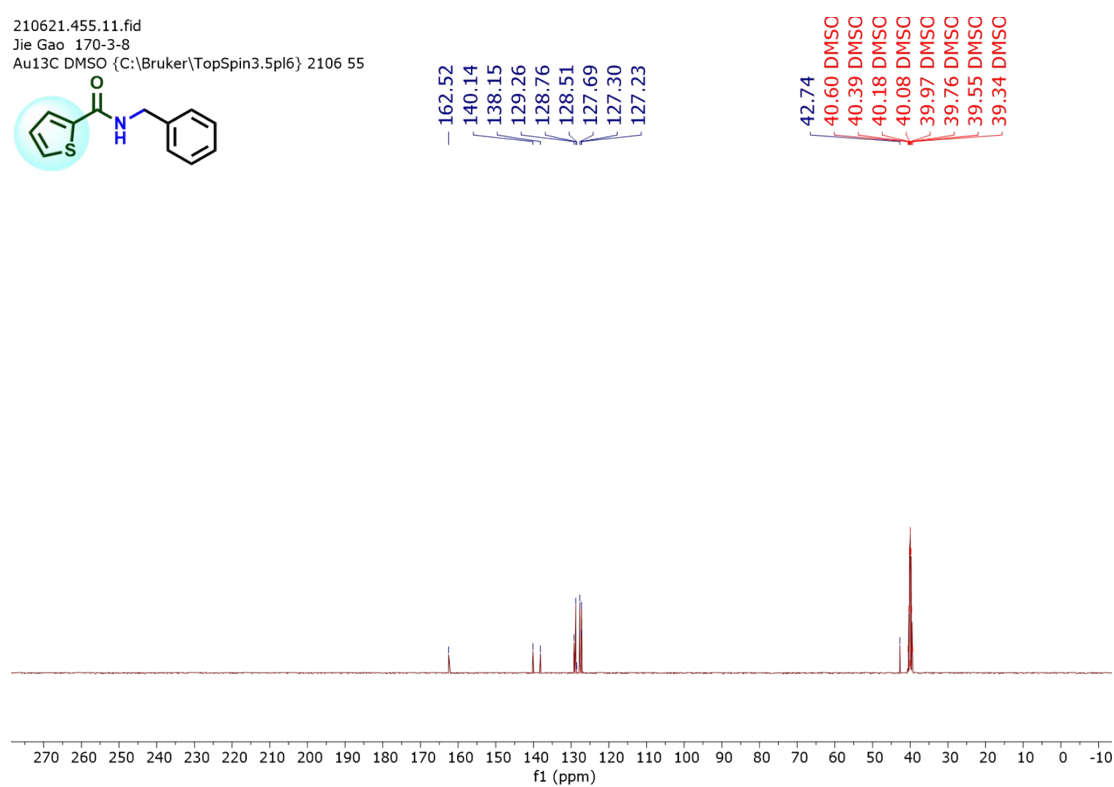

210621.459.10.fid  
Jie Gao 170-3-9  
Au1H DMSO {C:\Bruker\TopSpin3.5pl6} 2106 59

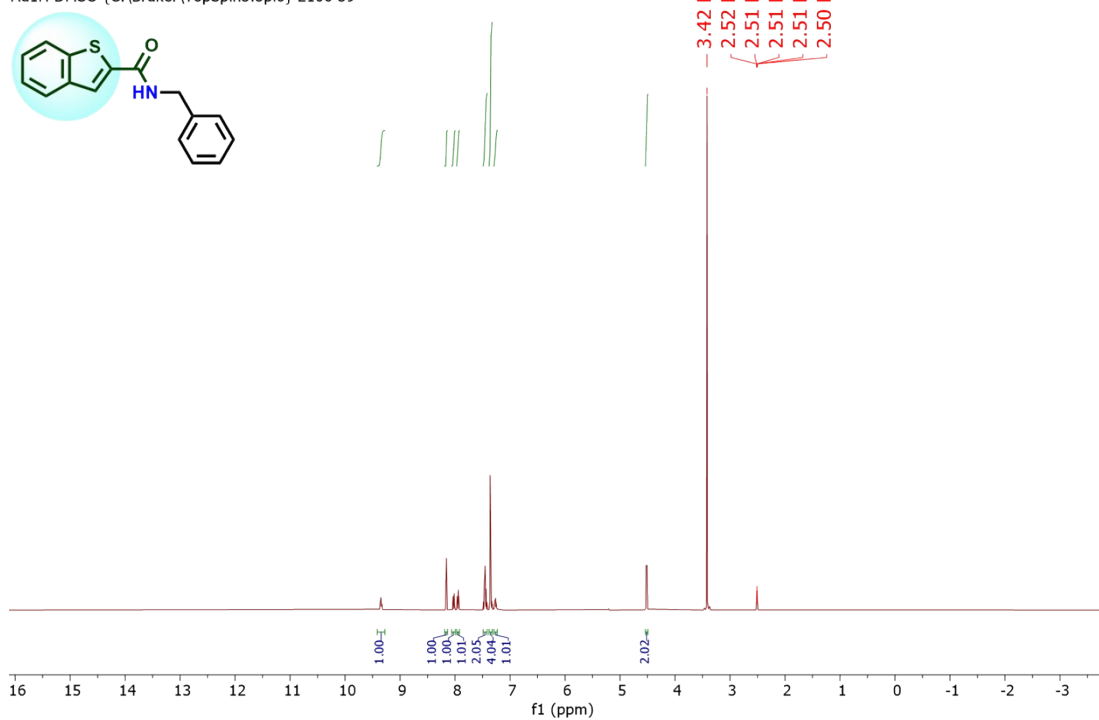

210621.459.11.fid  
Jie Gao 170-3-9  
Au13C DMSO {C:\Bruker\TopSpin3.5pl6} 2106 59

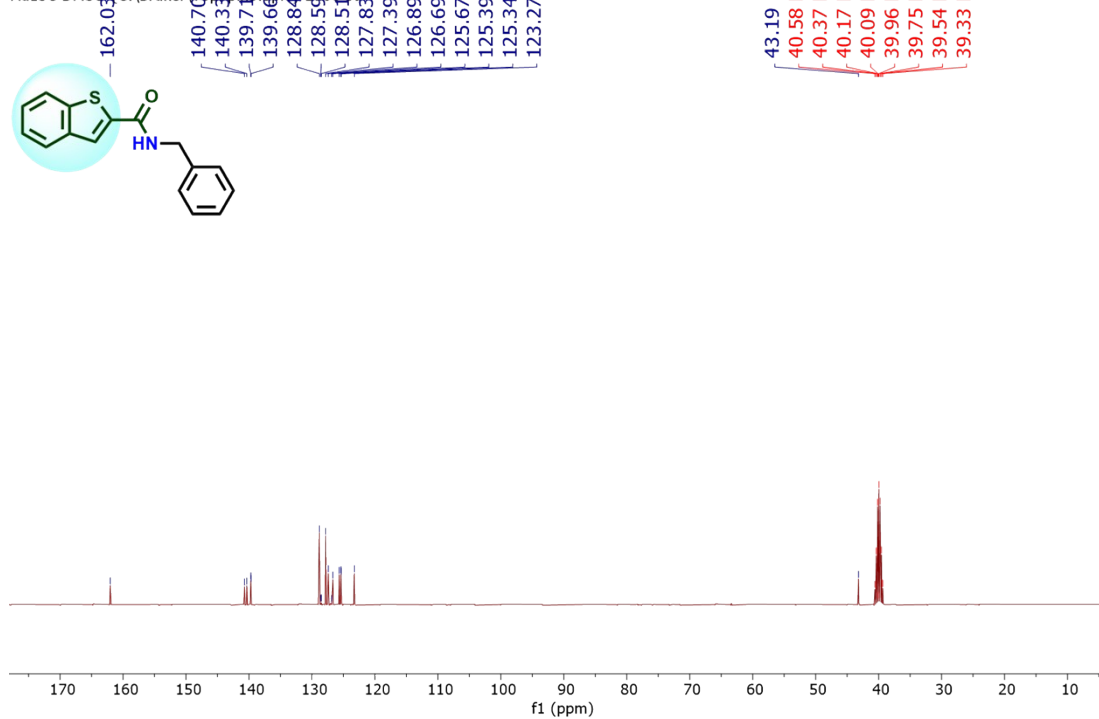

211022.309.10.fid  
 Rui Ma 47-1-10  
 Au1H DMSO {C:\Bruker\TopSpin3.6.2} 2110 9

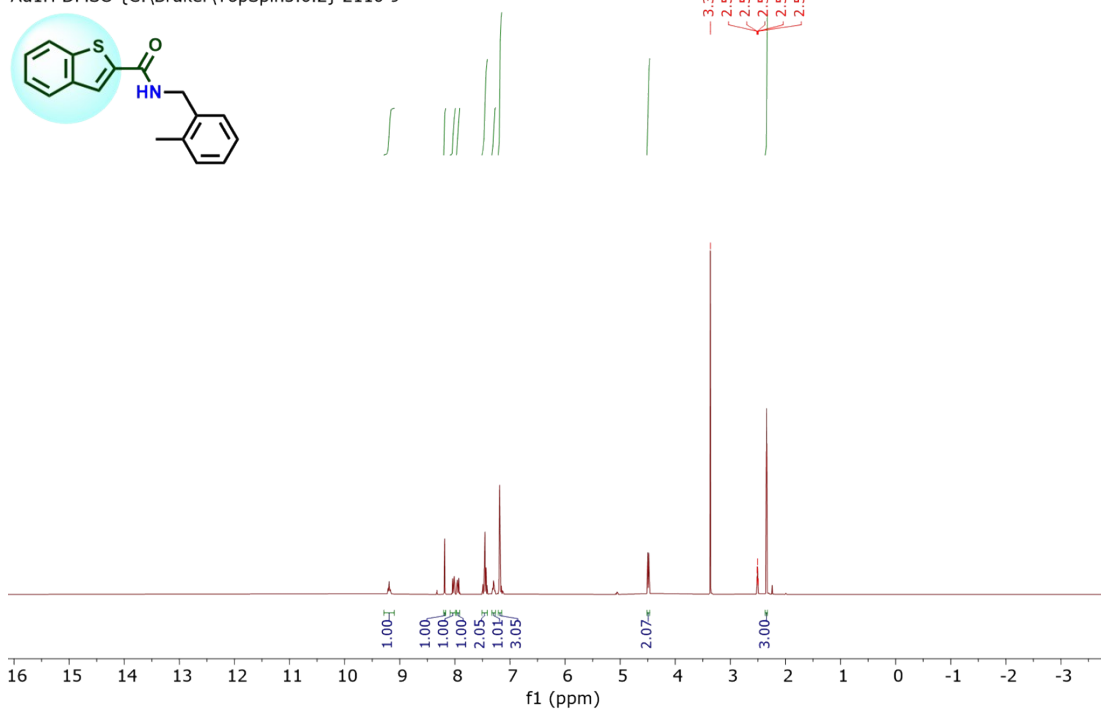

211022.309.11.fid  
 Rui Ma 47-1-10  
 Au13C DMSO {C:\Bruker\TopSpin3.6.2} 2110 9

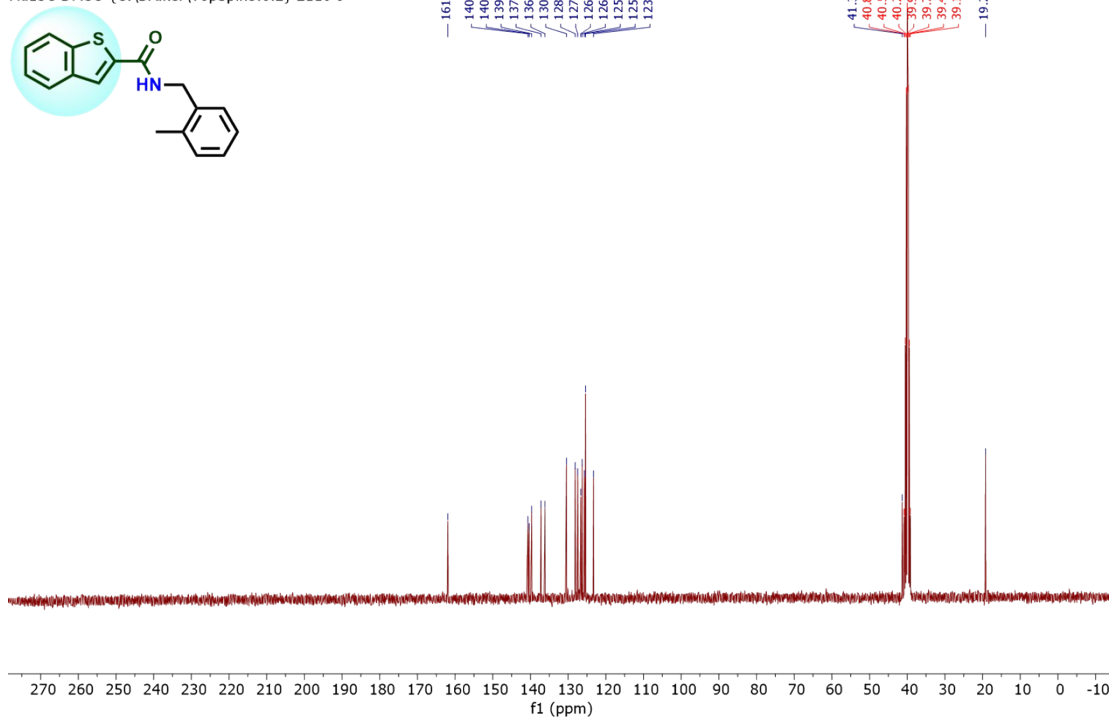

210629.323.10.fid  
Jie Gao 170-3-26  
Au1H CDCl<sub>3</sub> {C:\Bruker\TopSpin3.6.2} 2106 23

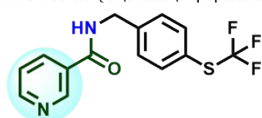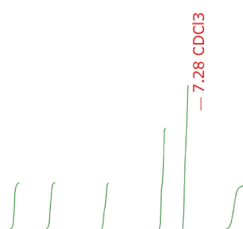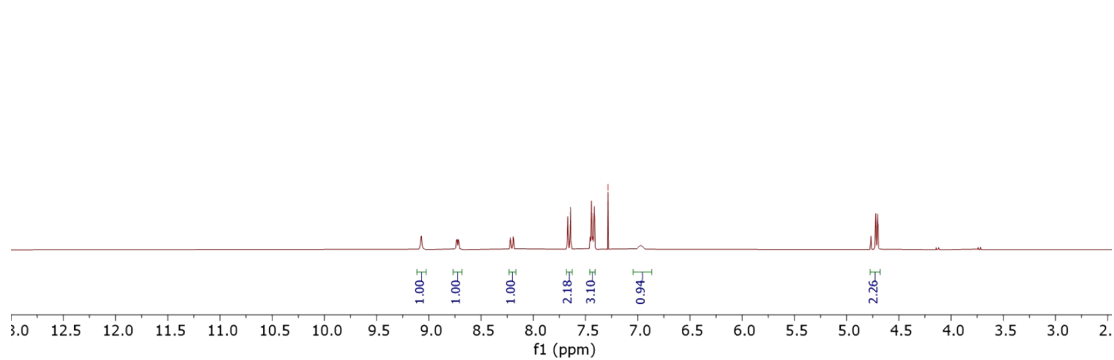

210629.323.11.fid  
Jie Gao 170-3-26  
Au13C CDCl<sub>3</sub> {C:\Bruker\TopSpin3.6.2} 2106 23

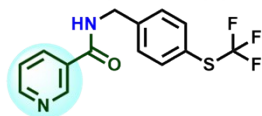

165.47  
152.08  
147.60  
141.02  
136.78  
136.53  
135.74  
129.98  
128.86  
127.65  
123.78

77.46 CDCl<sub>3</sub>  
77.03 CDCl<sub>3</sub>  
76.61 CDCl<sub>3</sub>

43.56

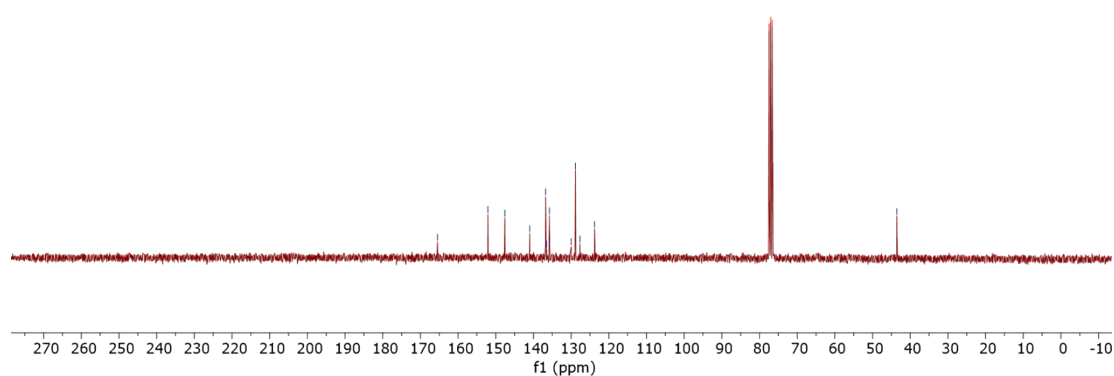

210629.324.10.fid  
Jie Gao 170-3-19  
Au1H CDCl3 {C:\Bruker\TopSpin3.6.2} 2106 24

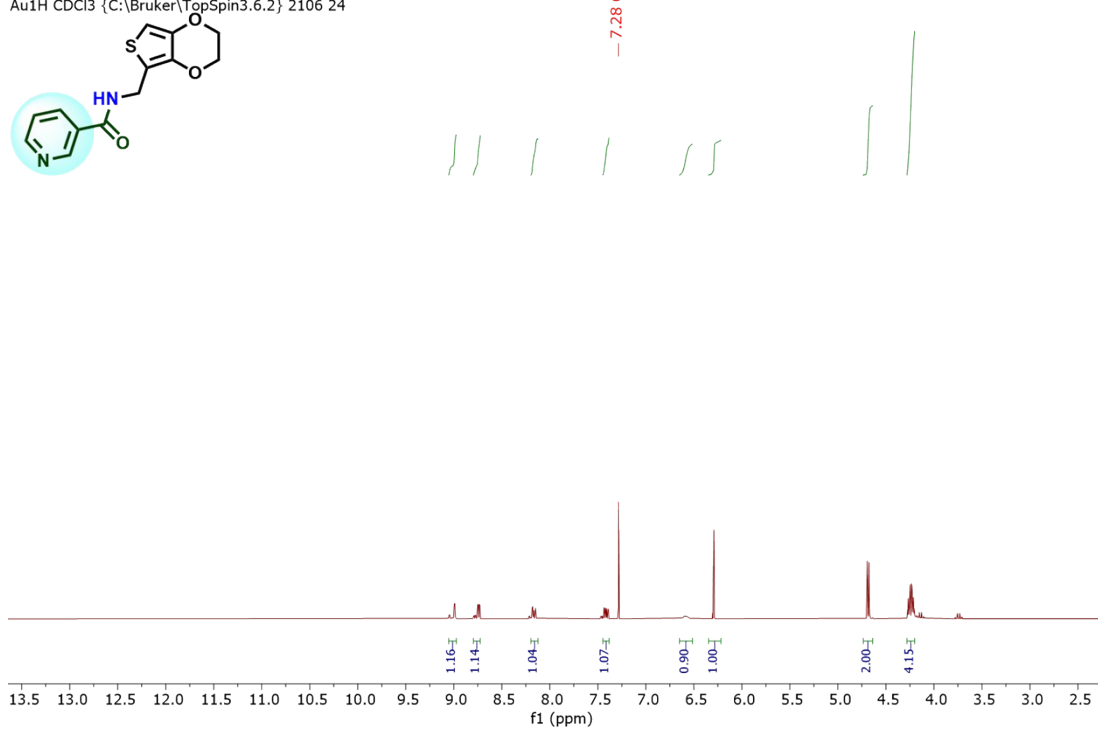

210629.324.11.fid  
Jie Gao 170-3-19  
Au13C CDCl3 {C:\Bruker\TopSpin3.6.2} 2106 24

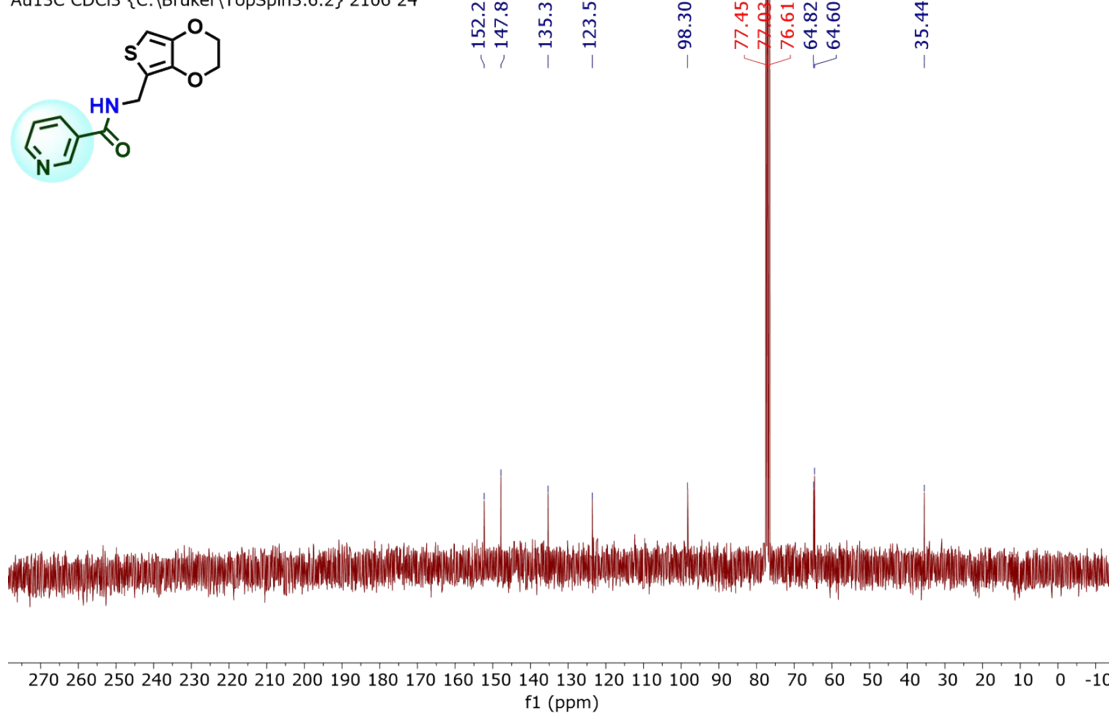

211103.f348.10.fid

Rui Ma 47-1-36

PROTON DMSO {C:\Bruker\TopSpin3.6.2} 2111 48

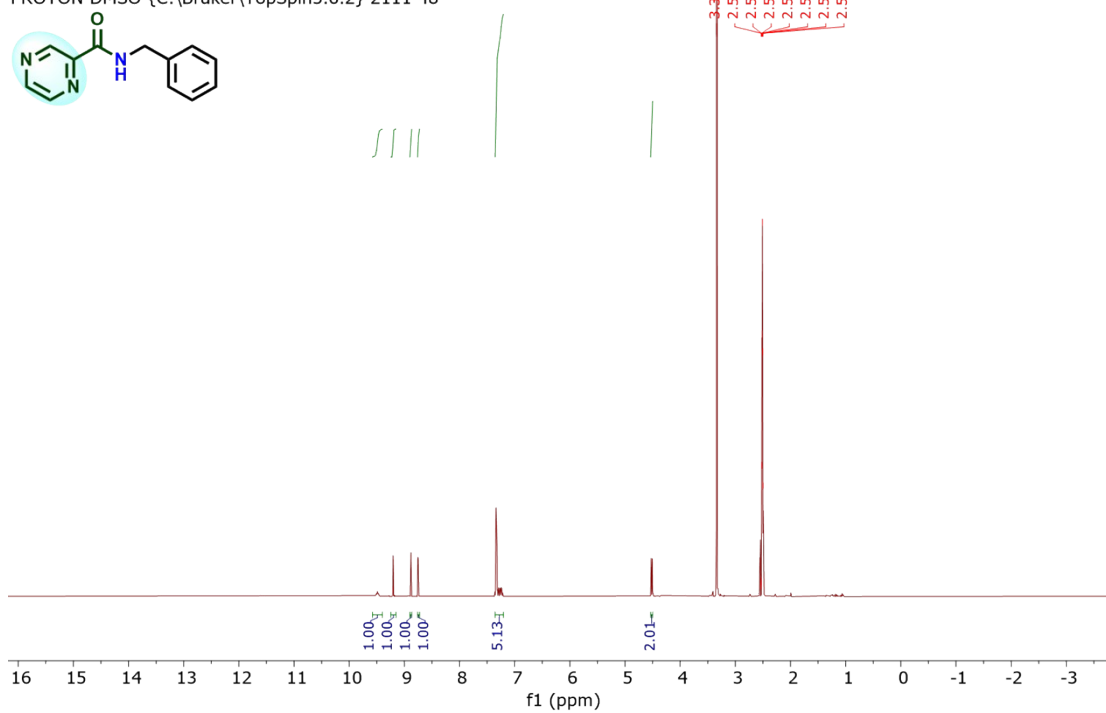

211103.f348.11.fid

Rui Ma 47-1-36

C13CPD DMSO {C:\Bruker\TopSpin3.6.2} 2111

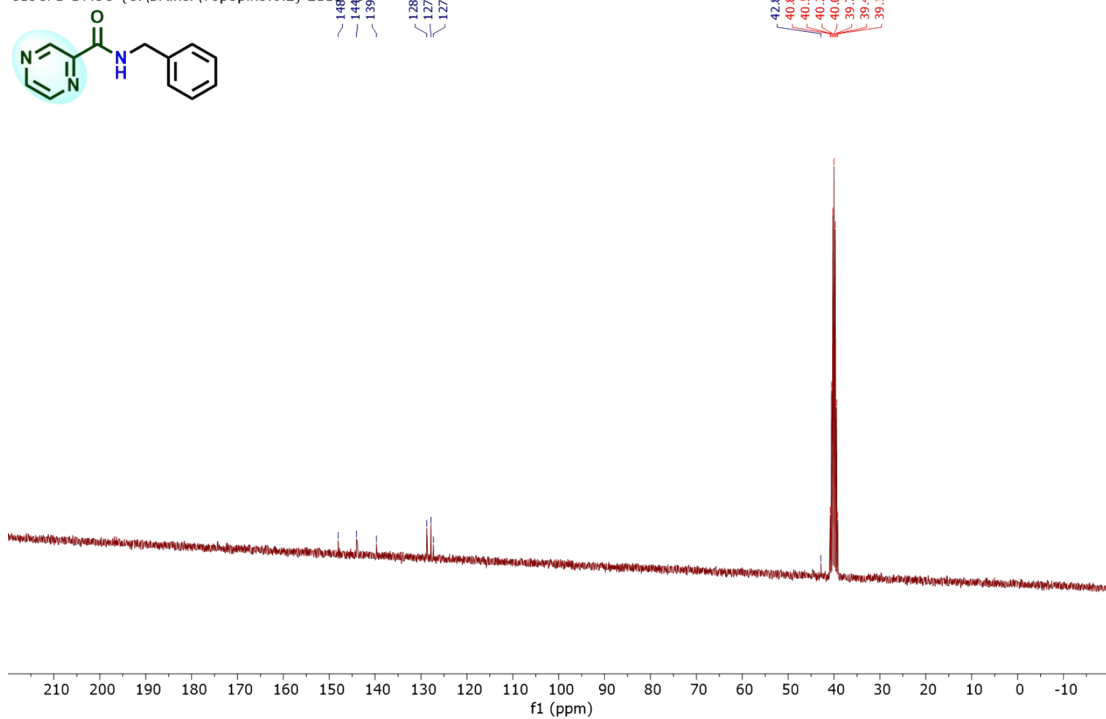

211103.f346.10.fid  
 Rui Ma 47-1-31  
 PROTON DMSO {C:\Bruker\TopSpin3.6.2} 2111 46

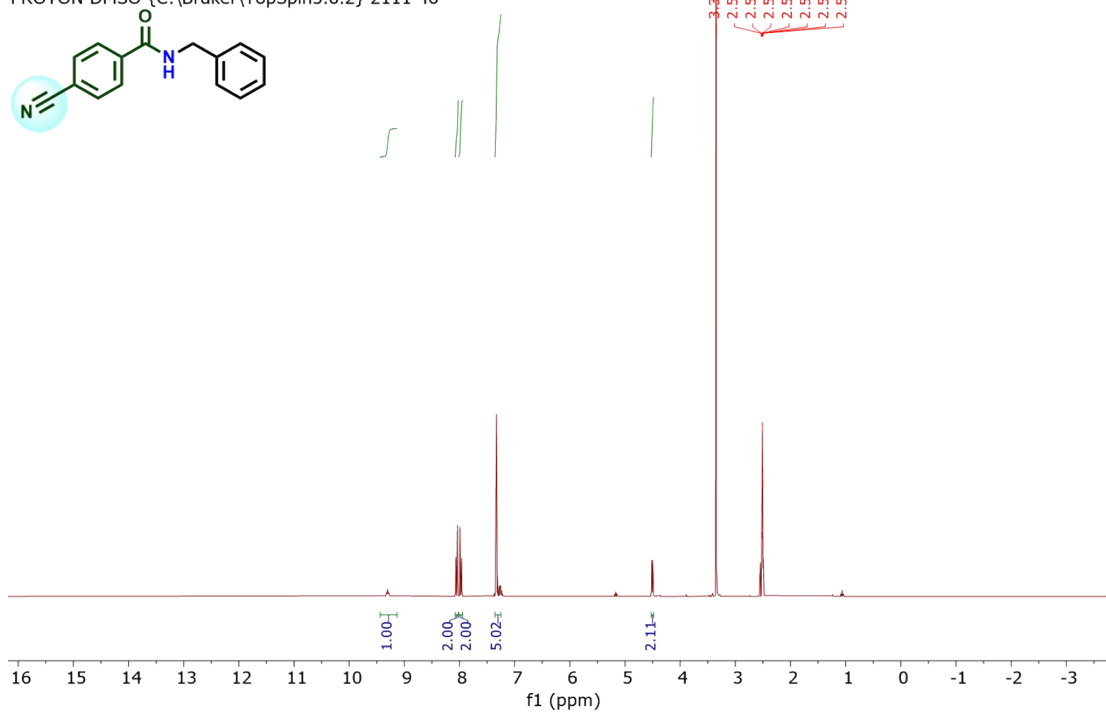

211103.f346.11.fid  
 Rui Ma 47-1-31  
 C13CPD DMSO {C:\Bruker\TopSpin3.6.2} 2111

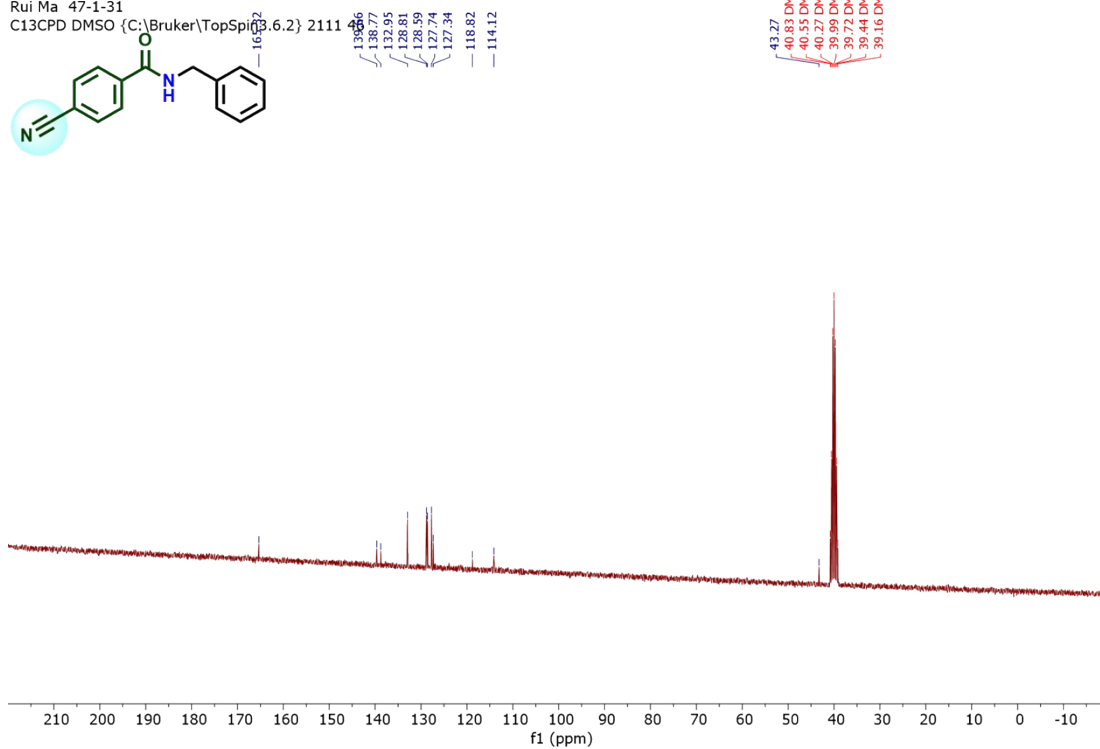

220624.f333.10.fid  
Ma/ 47-1-314  
PROTON CDCl<sub>3</sub> {C:\Bruker\TopSpin3.6.2} 2206 33

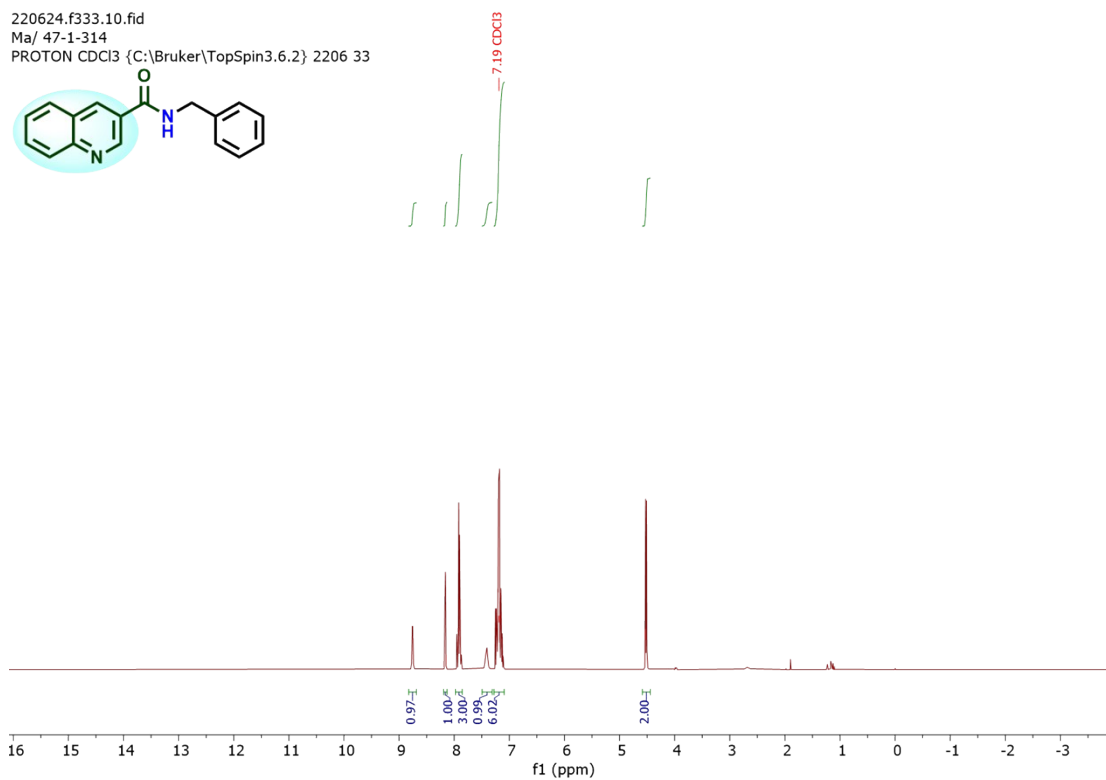

220624.f333.11.fid  
Ma/ 47-1-314  
C13CPD CDCl<sub>3</sub> {C:\Bruker\TopSpin3.6.2}

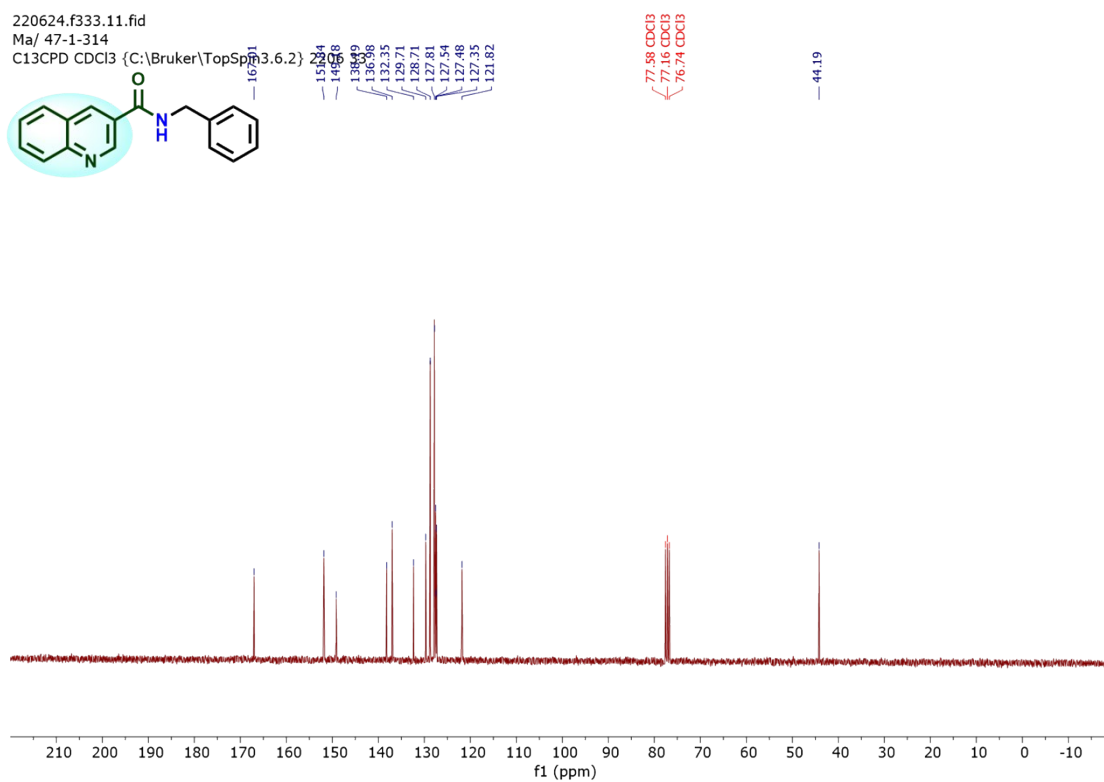

## 8. References

- [1] B. Sardar, R. Jamatia, A. Samanta, D. Srimani, *J Org Chem* **2022**, *87*, 5556-5567.
- [2] J. Das, D. Banerjee, *J Org Chem* **2018**, *83*, 3378-3384.
- [3] M. Trudell, T. Apsunde, *Synthesis* **2013**, *46*, 230-234.
- [4] S. S. Kulkarni, X. Hu, R. Manetsch, *Chem Commun* **2013**, *49*, 1193-1195.
- [5] J. Egly, W. Chen, A. Maisse-François, S. Bellemin-Laponnaz, T. Achard, *Eur. J. Ino. Che.*, **2022**, e202101033.
- [6] N. Wang, X. Zou, J. Ma, F. Li, *Chem Commun* **2014**, *50*, 8303-8305.
- [7] H. Cheng, M. Q. Xiong, C. X. Cheng, H. J. Wang, Q. Lu, H. F. Liu, F. B. Yao, C. Chen, F. Verpoort, *Chem Asian J* **2018**, *13*, 440-448.
- [8] S. Kerdphon, X. Quan, V. S. Parihar, P. G. Andersson, , *J. Org. Chem* **2015**, *80*, 11529-11537.
- [9] S. L. Zultanski, J. Zhao, S. S. Stahl, *J Am Chem Soc* **2016**, *138*, 6416-6419.
- [10] J. A. Forni, N. Micic, T. U. Connell, G. Weragoda, A. Polyzos, *Angew Chem Int Edl* **2020**, *59*, 18646-18654.
- [11] H. Lundberg, F. Tinnis, H. Adolfsson, *Chemistry* **2012**, *18*, 3822-3826.
- [12] S. Thurow, E. J. Lenardao, X. Just-Baringo, D. J. Procter, *Org Lett* **2017**, *19*, 50-53.
- [13] S. Azeez, P. Sureshbabu, S. Sabiah, J. Kandasamy, *Org Biomol Chem* **2022**, *20*, 2048-2053.
- [14] P. V. Ramachandran, H. J. Hamann, *Org Lett* **2021**, *23*, 2938-2942.
- [15] P. Xu, F.-S. Han, Y.-H. Wang, *Adv. Synth. Catal.*, **2015**, *357*, 3441-3446.
- [16] Y. Liang, Z. Zhao, A. Taya, N. Shibata, *Org Lett* **2021**, *23*, 847-852.
- [17] A. Wang, Y. Xie, J. Wang, D. Shi, H. Yu, *Chem Commun.*, **2022**, *58*, 1127-1130.
- [18] V. Zubar, A. Dewanji, M. Rueping, *Org Lett* **2021**, *23*, 2742-2747.
- [19] J.-W. Wu, Y.-D. Wu, J.-J. Dai, H.-J. Xu, *Adv. Synth. Catal.*, **2014**, *356*, 2429-2436.
- [20] A. M. Martinez, N. Rodriguez, R. Gomez Arrayas, J. C. Carretero, *Chem Commun.*, **2014**, *50*, 6105-6107.
- [21] N. Caldwell, C. Jamieson, I. Simpson, A. J. Watson, *Chem Commun.*, **2015**, *51*, 9495-9498.
- [22] N. F. Nikitas, M. K. Apostolopoulou, E. Skolia, A. Tsoukaki, C. G. Kokotos, *Chemistry* **2021**, *27*, 7915-7922.
- [23] W. J. Ang, L.-C. Lo, Y. Lam, *Tetrahedron* **2014**, *70*, 8545-8558.
